# Supplementary material
Source: PubMed Central journal article supplement (PMC3390928)

## Supporting Information

### A Formal Synthesis of (–)-Englerin A by RRCM and Transannular Etherification

Jungyong Lee and Kathlyn A. Parker\*

*Department of Chemistry, State University of New York at Stony Brook,  
Stony Brook, New York, 11794*

|                                                              |          |
|--------------------------------------------------------------|----------|
| General Information.....                                     | S2       |
| Experimental Details and Characterization of Compounds.....  | S2 - 11  |
| NOE diagrams and Table.....                                  | S12      |
| <sup>1</sup> H and <sup>13</sup> C spectra of compounds..... | S13 - 47 |

### Index of Compounds

| Compound No.                       | Experimental | NMR Spec.                                       |
|------------------------------------|--------------|-------------------------------------------------|
| Compound <b>7b</b>                 | S2           | -                                               |
| Compound <b>8</b>                  | S3           | S 13 ( <sup>1</sup> H), S 14 ( <sup>13</sup> C) |
| Aldehyde                           | S3           | S 15 ( <sup>1</sup> H), S 16 ( <sup>13</sup> C) |
| Compound <b>9</b>                  | S4           | S 17 ( <sup>1</sup> H), S 18 ( <sup>13</sup> C) |
| (S) and (R)-MTPA ester of <b>9</b> | -            | S 19 ( <sup>1</sup> H), S 20 ( <sup>1</sup> H)  |
| Compound <b>10</b>                 | S5           | S 21 ( <sup>1</sup> H), S 22 ( <sup>13</sup> C) |
| Compound <b>11</b>                 | S5           | S 23 ( <sup>1</sup> H), S 24 ( <sup>13</sup> C) |
| Compound <b>5a</b> + <b>13a</b>    | S6           | S 25 ( <sup>1</sup> H)                          |
| Compound <b>5a</b>                 | S6           | S 26 ( <sup>1</sup> H), S 27 ( <sup>13</sup> C) |
| Compound <b>13a</b>                | S6           | S 28 ( <sup>1</sup> H), S 29 ( <sup>13</sup> C) |
| Compound <b>5b</b> + <b>13b</b>    | S7           | S 30 ( <sup>1</sup> H)                          |
| Compound <b>5b</b>                 | S7           | S 31 ( <sup>1</sup> H), S 32 ( <sup>13</sup> C) |
| Compound <b>13b</b>                | S7           | S 33 ( <sup>1</sup> H), S 34 ( <sup>13</sup> C) |
| Compound <b>14</b>                 | S8           | S 35 ( <sup>1</sup> H), S 36 ( <sup>13</sup> C) |
| Compound <b>15</b>                 | S8           | S 37 ( <sup>1</sup> H), S 38 ( <sup>13</sup> C) |
| Compound <b>3</b> (R=H)            | S9           | S 39 ( <sup>1</sup> H), S 40 ( <sup>13</sup> C) |
| Compound <b>3</b> (R=TBS)          | S9           | S 41 ( <sup>1</sup> H), S 42 ( <sup>13</sup> C) |
| Compound <b>16</b>                 | S10          | S 43 ( <sup>1</sup> H)                          |
| Compound <b>17</b>                 | S10          | S 44 ( <sup>1</sup> H), S 45 ( <sup>13</sup> C) |
| Compound <b>18</b>                 | S10          | S 46 ( <sup>1</sup> H), S 47 ( <sup>13</sup> C) |
| 2-(1-methylethyl)-2-propene-1-ol   | S11          | -                                               |

## General Information

All air- and moisture sensitive reactions were performed under argon in oven-dried or flame-dried glassware. Unless stated otherwise, commercially available reagents were used as supplied and solvents were dried over molecular sieves prior to use. HPLC grade hexane and HPLC grade ethyl acetate (EtOAc) were used in chromatography. Tetrahydrofuran (THF) and diethyl ether (Et<sub>2</sub>O) were distilled from sodium-benzophenone ketyl and dichloromethane was distilled from calcium hydride under argon gas. All experiments were monitored by thin layer chromatography (TLC) performed on Whatman precoated AL SIL G/UV 250 μm layer aluminum-supported flexible plates. Flash chromatography was carried out with Sorbent Technologies silica gel (porosity 60 Å, 230-400 mesh, surface area 500-600 m<sup>2</sup>/g, bulk density 0.4 g/mL, pH range 6.5-7.5). Infrared spectra were recorded with a Perkin-Elmer 1600 Series FT-IR instrument. Samples were scanned as neat liquids or dissolved in CH<sub>2</sub>Cl<sub>2</sub> on sodium chloride (NaCl) salt plates. Frequencies are reported in reciprocal centimeters (cm<sup>-1</sup>). Nuclear magnetic resonance (NMR) spectra were recorded with a Varian Inova-600 (600 MHz for <sup>1</sup>H), a Varian Inova-500 (500 MHz for <sup>1</sup>H and 125 MHz for <sup>13</sup>C), Varian Inova-400 (400 MHz for <sup>1</sup>H and 100 MHz for <sup>13</sup>C), or Gemini-2300 (300 MHz for <sup>1</sup>H) spectrometer. Chemical shifts for proton NMR spectra are reported in parts per million (ppm) relative to the singlet at 7.26 ppm for chloroform-*d*. Chemical shifts for carbon NMR spectra are reported in ppm with the center line of the triplet for chloroform-*d* set at 77.00 ppm. COSY and NOE experiments were measured on Varian Inova-400 and Varian Inova-600 spectrometer. High-resolution mass spectra were obtained on a Micromass Q-ToF Ultima spectrometer by the Mass Spectrometry Laboratory at the University of Illinois Urbana Champaign.<sup>1</sup>

## Experimental Procedures and Characterization of Compounds

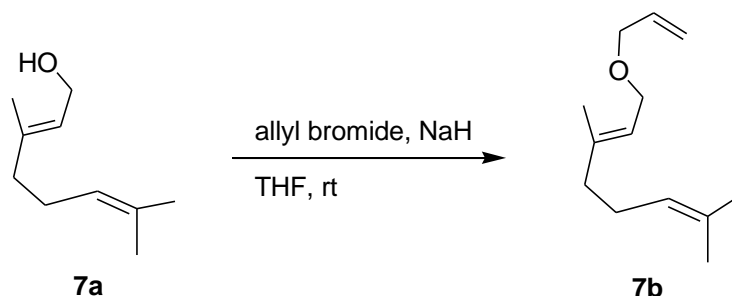

**Ether 7b.** To a stirred solution of geraniol (**7a**, 5.00 g, 32.4 mmol) in THF (50 mL) were added allyl bromide (4.71 g, 38.9 mmol) and slowly NaH (1.43 g, 60 %, 35.7 mmol) under argon.

<sup>1</sup> <http://www.scs.uiuc.edu/~msweb/instrum/qtof.php>



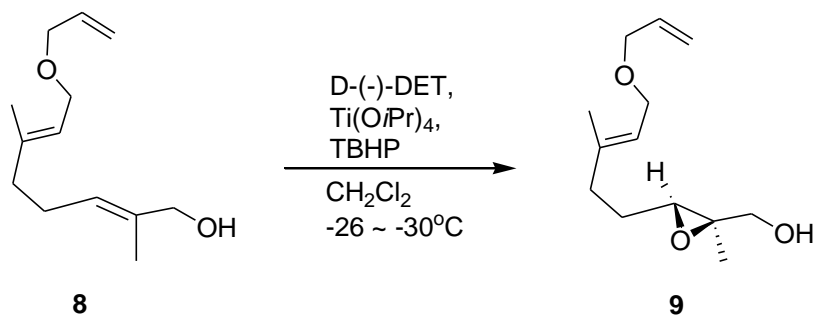

**Epoxy Alcohol 9.** Regio- and stereoselective epoxidation was accomplished by the catalytic procedure of Sharpless.<sup>4</sup> To a stirred suspension of activated 4 Å molecular sieves (1.6 g) in CH<sub>2</sub>Cl<sub>2</sub> (124 mL) under argon were added alcohol **8** (2.59 g, 12.3 mmol) and D-(-)-DET (381 mg, 1.85 mmol). The resulting mixture was stirred and cooled to -20 °C. A solution of Ti(O<sup>*i*</sup>Pr)<sub>4</sub> (350 mg, 1.23 mmol) in CH<sub>2</sub>Cl<sub>2</sub> (2 mL) was added dropwise and stirred at -20 °C for 30 min. Then TBHP (4.50 mL, 24.7 mmol, 5.5 M in decane with molecular sieves) was added dropwise and the resulting mixture was cooled to -26 to -30 °C. After 2.5 h, it was warmed to 0 °C, water (7 mL) was added, and the solution was allowed to warm to room temperature. A 30% NaOH solution saturated with solid NaCl was prepared. Of this, 1.4 mL was added to the reaction mixture. Vigorous stirring was continued for 30 min. Then the reaction mixture was filtered through Celite and the filter cake was washed with CH<sub>2</sub>Cl<sub>2</sub>. The combined organic solution was concentrated under reduced pressure and subjected to silica gel flash column chromatography (elution with EtOAc : Hexane = 1 : 4 to 1 : 1) to afford epoxide **9** (2.42 g, 83 %) as a colorless oil. <sup>1</sup>H NMR (500 MHz, CDCl<sub>3</sub>) δ 1.28 (s, 3H), 1.69 (s, 3H), 1.79 – 1.65 (m, 2H), 1.84 (d, *J* = 5.0 Hz, 1H), 2.20 (m, 1H), 3.03 (t, *J* = 6.5 Hz, 1H), 3.60 (dd, *J* = 12.3, 8.3 Hz, 1H), 3.61 (dd, *J* = 12.5, 4.3 Hz, 1H), 3.98 (t, 4H), 5.18 (d, *J* = 10.5 Hz, 1H), 5.27 (d, *J* = 17.5 Hz, 1H), 5.41 (t, *J* = 6.5 Hz, 1H), 5.92 (m, 1H). <sup>13</sup>C NMR (125 MHz, CDCl<sub>3</sub>) δ 14.2, 16.3, 26.3, 36.1, 60.0, 60.9, 65.6, 66.4, 71.1, 117.0, 121.5, 134.8, 138.9.; IR (neat) ν<sub>max</sub> 3441, 2925, 2857, 1741, 1670, 1647, 1449, 1384 cm<sup>-1</sup>. HRMS[ES<sup>+</sup>] calcd for C<sub>13</sub>H<sub>22</sub>O<sub>3</sub> [M + Na]<sup>+</sup> 249.1467, found 249.1456. The enantiomeric excess was determined to be 93 % ee by comparison of the <sup>1</sup>H NMR of the (*S*)-MTPA and the (*R*)-MTPA ester.

<sup>4</sup> (a) Gao, Y.; Hanson, R.M.; Klunder, J.M.; Ko, S.Y.; Masamune, H.; Sharpless, K.B. *J. Am. Chem. Soc.* **1987**, *109*, 5765. (b) Ichige, T.; Okano, Y.; Kanoh, N.; Nakata, M. *J. Org. Chem.* **2009**, *74*, 230. (c) Bravo, F.; McDonald, F. E.; Neiwert, W. A.; Hardcastle, K. I. *Org. Lett.* **2004**, *6*, 4487.

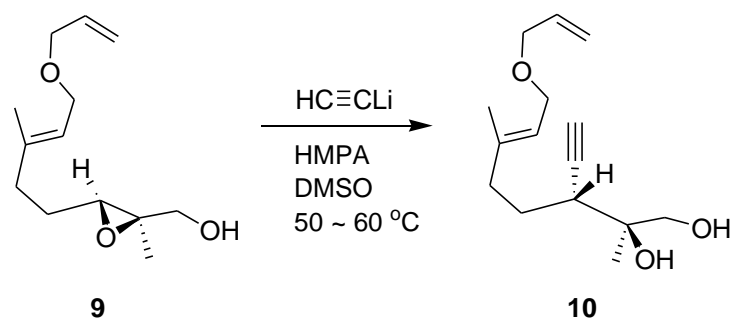

**Diol 10.** To a stirred solution of epoxide **9** (933 mg, 3.95 mmol) in DMSO (13 mL) and HMPA (13 mL) under argon was added Li-acetylide-ethylenediamine complex (2.02 g, 19.8 mmol, 90 %) at room temperature. The mixture was warmed to 55 °C and stirred for 3.5 h. The reaction was carefully quenched with saturated aq.  $\text{NH}_4\text{Cl}$  (3 mL) at 0 °C and the resulting mixture was diluted with  $\text{Et}_2\text{O}$  (45 mL). Then saturated aq.  $\text{LiCl}$  was added very carefully. The resulting mixture was separated and the aqueous solution was extracted with  $\text{Et}_2\text{O}$  (20 mL X 5). The combined organic solution was dried over  $\text{MgSO}_4$ , decolorized with activated charcoal, and concentrated under reduced pressure. Silica gel flash column chromatography (elution with  $\text{EtOAc}$  : Hexane = 1 : 1) provided diol **10** (814 mg, 82 %) as a pale yellow oil.  $^1\text{H}$  NMR (400 MHz,  $\text{CDCl}_3$ )  $\delta$  1.10 (s, 3H), 1.43 (m, 1H), 1.61 (s, 3H), 1.84 (m, 1H), 2.03 (m, 1H), 2.07 (d,  $J$  = 2.8 Hz, 1H), 2.28 (m, 1H), 2.43 (dt,  $J$  = 11.6, 2.6 Hz, 1H), 3.05 (br, 1H), 3.40 (d,  $J$  = 11.2 Hz, 1H), 3.70 (d,  $J$  = 11.2 Hz, 1H), 3.92 (m, 4H), 5.12 (dd,  $J$  = 10.4, 4.0 Hz, 1H), 5.21 (dd,  $J$  = 17.2, 1.2 Hz, 1H), 5.35 (td,  $J$  = 7.2, 1.2 Hz, 1H), 5.85 (ddt,  $J$  = 17.2, 10.4, 5.6 Hz, 1H).  $^{13}\text{C}$  NMR (100 MHz,  $\text{CDCl}_3$ )  $\delta$  16.3, 19.3, 26.3, 37.5, 38.3, 66.3, 68.4, 70.8, 71.4, 73.9, 84.5, 117.0, 120.9, 134.6, 139.6.; IR (neat)  $\nu_{\text{max}}$  3418, 3080, 2935, 2110, 1668, 1646, 1455, 1381  $\text{cm}^{-1}$ . HRMS[ES<sup>+</sup>] calcd for  $\text{C}_{15}\text{H}_{24}\text{O}_3$  [ $\text{M} + \text{Na}$ ]<sup>+</sup> 275.1623, found 275.1615.

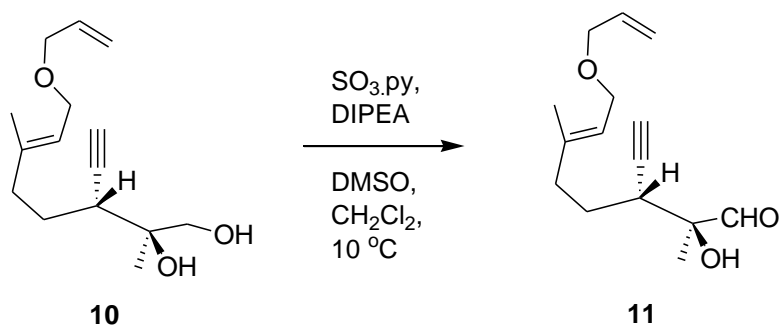

**Aldehyde 11.** Oxidation was performed by the Parikh-Doering method.<sup>5</sup> To a stirred solution of diol **10** (200 mg, 0.793 mmol) in  $\text{CH}_2\text{Cl}_2$  (5.5 mL) were added DMSO (495 mg, 6.34 mmol) and *N,N*-diisopropylamine (DIPEA) (410 mg, 3.17 mmol). Then the reaction mixture was cooled to 0 °C under argon. The  $\text{SO}_3\cdot\text{Py}$  complex (322 mg, 1.98 mmol) was added and the reaction mixture was stirred for 1 h at 0 °C. Then it was warmed to 10 °C and stirred for 2 h. Additional DMSO (0.14 mL, 1.97 mmol), DIPEA (0.10 mL, 0.57 mmol), and  $\text{SO}_3\cdot\text{Py}$  complex (130 mg, 98%, 0.80 mmol) were added and stirring was

<sup>5</sup> Parikh, J.R.; von Doering, W. E. *J. Am. Chem. Soc.* **1967**, *89*, 5505

continued for 1h. The reaction mixture was quenched with 1N HCl (3 mL) and extracted with CH<sub>2</sub>Cl<sub>2</sub> (5 mL X 2). The combined organic solution was washed with saturated aq. NaHCO<sub>3</sub> and brine, dried over MgSO<sub>4</sub>, and concentrated under reduced pressure. The residue was purified by silica gel flash column chromatography (elution with EtOAc : Hexane = 1 : 4) to afford aldehyde **11** as a colorless oil (142 mg, 71 %). <sup>1</sup>H NMR (400 MHz, CDCl<sub>3</sub>) δ 1.34 (s, 3H), 1.59 (s, 3H), 1.61 (m, 1H), 2.01 – 2.10 (m, 1H), 2.18 (d, *J* = 2.4 Hz, 1H), 2.24 – 2.31 (m, 1H), 2.46 (ddd, *J* = 10.4, 4.4, 2.4 Hz, 1H), 3.35 (br, 1H), 3.91 (m, 4H), 5.12 (dd, *J* = 10.2, 1.6 Hz, 1H), 5.21 (dd, *J* = 17.2, 1.6 Hz, 1H), 5.34 (td, *J* = 6.4, 0.8 Hz, 1H), 5.86 (m, 1H), 9.66 (s, 1H). <sup>13</sup>C NMR (100 MHz, CDCl<sub>3</sub>) δ 16.2, 19.6, 26.8, 36.9, 38.4, 66.2, 70.8, 73.2, 78.0, 81.9, 116.8, 121.7, 134.8, 138.6, 203.3.; IR (neat) ν<sub>max</sub> 3430, 3295, 3080, 2935, 2859, 1732, 1669, 1646, 1452, 1349 cm<sup>-1</sup>. HRMS[ES<sup>+</sup>] calcd for C<sub>15</sub>H<sub>22</sub>O<sub>3</sub> [M + H]<sup>+</sup> 251.1647, found 251.1657.

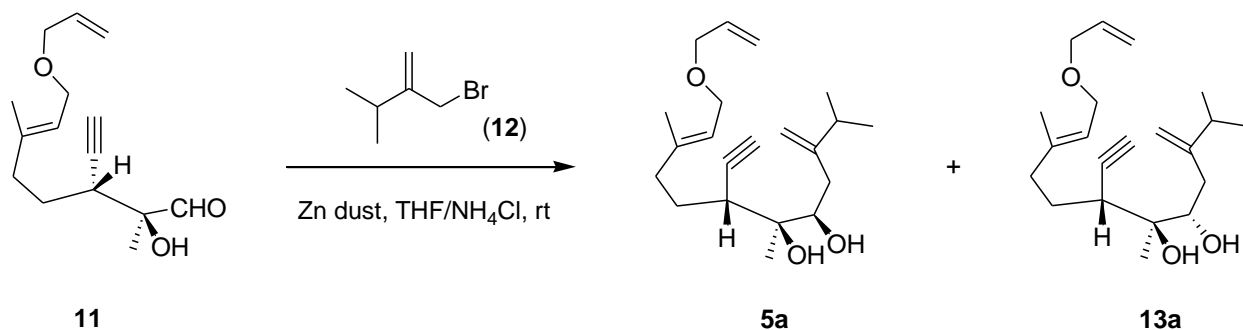

**Diols 5a and 13a.** The allylation procedure of Luche et al. was used.<sup>6</sup> To a stirred solution of aldehyde **11** (374 mg, 1.43 mmol) in THF (10 mL) and saturated aq. NH<sub>4</sub>Cl (5 mL) were added 2-bromo-methyl-3-methyl-1-butene **12** (1.07 g, 6.57 mmol) and activated Zn dust (683 mg, 10.5 mmol). The reaction mixture was stirred for 12 h under argon and diluted with Et<sub>2</sub>O (10 mL). The resulting mixture was filtered through Celite and the filter cake was washed with Et<sub>2</sub>O. After separation of the layers, the aqueous phase was extracted with Et<sub>2</sub>O (10 mL X 3). The combined organic solution was washed with brine, dried over MgSO<sub>4</sub>, and concentrated under reduced pressure. The crude product was subjected to column chromatography (elution with EtOAc : Hexane = 1 : 4) to afford a mixture of **5a** and **13a** (398 mg, 80 %, d.r. **5a** : **13a** = 1.8 : 1.0)<sup>7</sup>.

A sample of the mixture was subjected to additional chromatography and spectroscopic data were obtained for each isomer.

**Slower moving isomer, later shown to be 5a** (colorless oil) : <sup>1</sup>H NMR (500 MHz, CDCl<sub>3</sub>) δ 1.07 (d, *J* = 7.0 Hz, 3H), 1.08 (d, *J* = 7.0 Hz, 3H), 1.32 (s, 3H), 1.57 (m, 1H), 1.69 (s, 3H), 1.97 (m, 1H), 2.02 (m, 1H), 2.07 – 2.14 (m, 3H), 2.29 (m, 1H), 2.37 (m, 1H), 2.47 (dt, *J* = 11.5, 2.6 Hz, 1H), 2.58 (d, *J* = 13.5 Hz, 1H), 3.79 (dd, *J* = 9.0, 2.0 Hz, 1H), 3.98 (dd, *J* = 11.5, 6.0 Hz, 4H), 4.84 (s, 1H), 4.98 (s, 1H), 5.17 (d, *J* = 10.5 Hz, 1H), 5.27 (dd, *J* = 15.5, 1.5 Hz, 1H), 5.43 (td, *J* = 5.5, 1.0 Hz, 1H), 5.89 – 5.97 (m, 1H). <sup>13</sup>C NMR (125 MHz, CDCl<sub>3</sub>) δ 16.5, 20.7, 21.4, 22.2, 26.9, 33.0, 36.2, 37.7, 38.4, 66.5, 70.9, 71.8, 71.9, 74.7, 84.2, 110.8, 116.9, 121.3, 135.0,

<sup>6</sup> Petrier, C.; Einhorn, J.; Luche, J.L. *Tetraheron Lett.* **1985**, *26*, 1449.

<sup>7</sup> The diastereomer ratio was determined by <sup>1</sup>H NMR.

139.7, 153.2.; IR (neat)  $\nu_{\max}$  3454, 3307, 3081, 2962, 2871, 1640, 1455, 1379  $\text{cm}^{-1}$ . HRMS[ES+] calcd for  $\text{C}_{21}\text{H}_{34}\text{O}_3$  [M + Na]<sup>+</sup> 357.2406, found 357.2398.

**Faster moving isomer, later shown to be 13a** (white solid) : <sup>1</sup>H NMR (400 MHz,  $\text{CDCl}_3$ )  $\delta$  1.07 (d,  $J$  = 6.8 Hz, 3H), 1.08 (d,  $J$  = 6.8 Hz, 3H), 1.16 (s, 3H), 1.53 (m, 1H), 1.68 (s, 3H), 1.96 (m, 1H), 2.05 – 2.11 (m, 1H), 2.11 (d,  $J$  = 2.4 Hz, 1H), 2.13 – 2.19 (m, 1H), 2.18 (d,  $J$  = 2.0 Hz, 1H), 2.25 (s, 1H), 2.25 – 2.30 (m, 1H), 2.33 – 2.40 (m, 1H), 2.41 (d,  $J$  = 14.0 Hz, 1H), 2.71 (dt,  $J$  = 11.6, 2.8 Hz, 1H), 3.96 (dt,  $J$  = 6.0, 1.2 Hz, 2H), 3.99 – 4.02 (m, 3H), 4.85 (s, 1H), 4.99 (s, 1H), 5.17 (dd,  $J$  = 10.4, 1.6 Hz, 1H), 5.27 (dq,  $J$  = 17.6, 1.6 Hz, 1H), 5.42 (td,  $J$  = 6.8, 0.8 Hz, 1H), 5.93 (m, 1H). <sup>13</sup>C NMR (100 MHz,  $\text{CDCl}_3$ )  $\delta$  16.5, 17.6, 21.5, 22.2, 26.7, 33.3, 36.4, 37.9, 39.5, 66.5, 70.8, 70.9, 71.3, 75.2, 85.3, 110.6, 116.9, 121.3, 135.0, 139.8, 153.0.; IR (neat)  $\nu_{\max}$  3382, 3304, 3229, 2961, 2916, 2850, 1643, 1455, 1391  $\text{cm}^{-1}$ . HRMS[ES+] calcd for  $\text{C}_{21}\text{H}_{34}\text{O}_3$  [M + Na]<sup>+</sup> 357.2406, found 357.2401. mp = 53 - 55 °C.

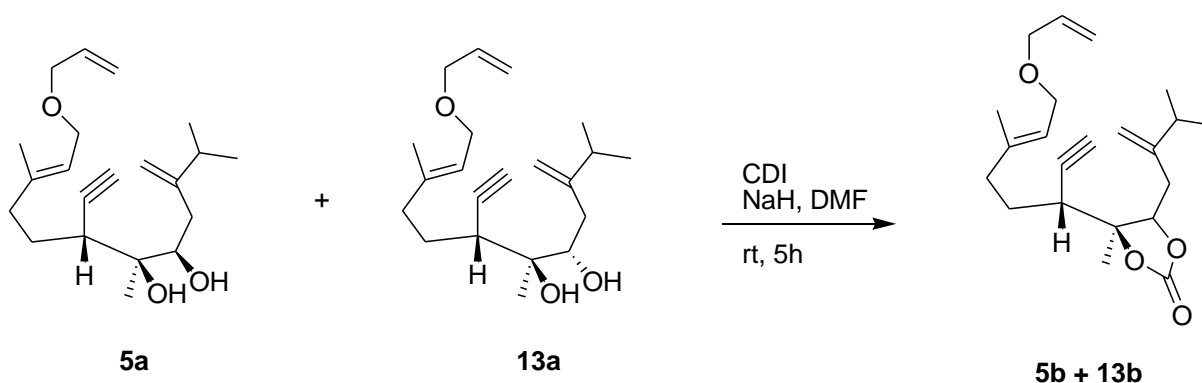

**Carbonates 5b+13b.** To a stirred solution of the mixture of **5a** and **13a** (177 mg, 0.528 mmol) in DMF (1.7 mL) under argon was added NaH (44.3 mg, 60%, 1.11 mmol). The reaction mixture was stirred for 15 min and then 1,1'-carbonyldiimidazole (CDI) (530 mg, 3.17 mmol) was added slowly. The resulting mixture was stirred at room temperature for 4 h.  $\text{Et}_2\text{O}$  and saturated aq.  $\text{NH}_4\text{Cl}$  were added and the resulting mixture was stirred for 10 min. After separation of the two layers, the organic solution was washed with water (1.5 mL X 3) and brine and then dried over  $\text{MgSO}_4$  and concentrated under reduced pressure. The residue was purified by silica gel column chromatography (elution with  $\text{EtOAc}$  : hexane = 1 : 4) to provide a mixture of carbonates **5b** and **13b** (175 mg, 92 %) as a colorless oil. Without further purification, the mixture of carbonate **5b** and **13b** was directly used for the next step.

For the purpose of characterization, each carbonate isomer was prepared from the corresponding diol (see above).

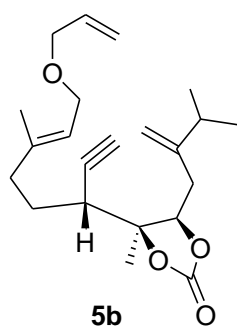

**5b** : <sup>1</sup>H NMR (600 MHz,  $\text{CDCl}_3$ )  $\delta$  1.04 (t,  $J$  = 6.6 Hz, 6H), 1.56 (s, 3H), 1.65 (m, 1H), 1.66 (s, 3H), 1.87 – 1.94 (m, 1H), 2.11 (m, 1H), 2.24 – 2.37 (m, 4H), 2.69 (d,  $J$  = 11.4 Hz, 1H), 2.81 (d,  $J$  = 15.0 Hz, 1H), 3.97 (dd,  $J$  = 12.6, 6.0 Hz, 4H), 4.46 (d,  $J$  = 12.0, 1H), 4.85 (s, 1H), 4.93 (s, 1H), 5.15 (d,  $J$  = 10.2 Hz, 1H), 5.28 (d,  $J$  = 18.0 Hz, 1H), 5.41 (t,  $J$  = 6.6 Hz, 1H), 5.87 – 5.94 (m, 1H). <sup>13</sup>C NMR (125 MHz,  $\text{CDCl}_3$ )  $\delta$  16.3, 20.5, 21.4, 21.6, 27.4, 33.5, 33.7, 35.3, 36.9, 66.3, 71.0, 73.5, 81.9, 84.9, 85.7, 110.6,

116.9, 122.2, 134.8, 138.4, 149.5, 153.4.; IR (neat)  $\nu_{\max}$  3288, 3083, 2964, 2872, 1808, 1646, 1455, 1384  $\text{cm}^{-1}$ . HRMS[ES+] calcd for  $\text{C}_{22}\text{H}_{32}\text{O}_4$  [M + Na]<sup>+</sup> 383.2198, found 383.2199

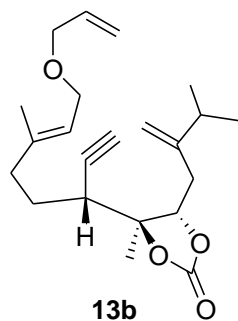

**13b**

**13b** : <sup>1</sup>H NMR (400 MHz,  $\text{CDCl}_3$ )  $\delta$  1.04 (d,  $J$  = 4.8 Hz, 3H), 1.06 (d,  $J$  = 4.8 Hz, 3H), 1.43 (s, 3H), 1.59 (m, 1H), 1.67 (s, 3H), 1.86 – 1.94 (m, 1H), 2.12 (m, 1H), 2.22 (d,  $J$  = 2.4 Hz, 1H), 2.26 – 2.38 (m, 2H), 2.40 (d,  $J$  = 10.4 Hz, 1H), 2.51 (d,  $J$  = 15.2 Hz, 1H), 2.65 (dt,  $J$  = 8.8, 2.4 Hz, 1H), 3.98 (m, 4H), 4.64 (dd,  $J$  = 8.0, 2.4 Hz, 1H), 4.90 (s, 1H), 4.94 (s, 1H), 5.18 (dd,  $J$  = 10.4, 1.2 Hz, 1H), 5.28 (dd,  $J$  = 17.6, 1.6 Hz, 1H), 5.42 (t,  $J$  = 6.4 Hz, 1H), 5.88 – 5.98 (m, 1H). <sup>13</sup>C NMR (125 MHz,  $\text{CDCl}_3$ )  $\delta$  15.7, 16.3, 21.5, 21.6, 27.0, 33.5, 35.4, 36.9, 41.3, 66.5, 71.1, 73.5, 81.2, 83.8, 85.8, 110.5, 117.0, 122.4, 134.9, 138.2, 149.9, 153.2.; IR (neat)  $\nu_{\max}$  3288, 2962, 2871, 1805, 1646, 1455, 1385  $\text{cm}^{-1}$ . HRMS[ES+] calcd for  $\text{C}_{22}\text{H}_{32}\text{O}_4$  [M + Na]<sup>+</sup> 383.2198, found

383.2194.

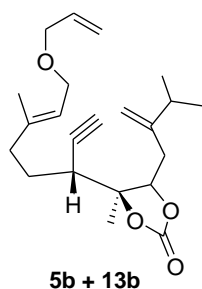

**5b + 13b**

Stewart - Grubbs  
catalyst, Toluene  
80°C, 24h

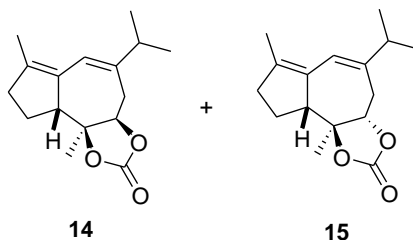

**14**

**15**

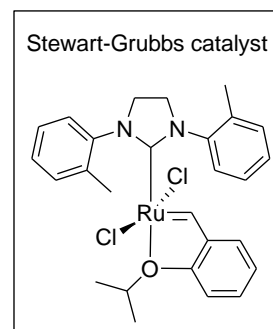

**Bicyclic Dienes 14 and 15.** To a stirred solution of the mixture of carbonates **5b** and **13b** (31.7 mg, 0.088 mmol) in toluene (8.8 mL) under Argon was added 30 mol % Stewart -Grubbs catalyst<sup>8</sup> (15.0 mg, 0.026 mmol). The resulting mixture was stirred at 80 °C for 24 h. After cooling down to room temperature, the reaction mixture was concentrated. The residue was subjected to silica gel flash column chromatography (elution with EtOAc : hexane = 1 : 4) to give diene **14** (10.3 mg, 45 %) as an oil and diene **15** (7.4 mg, 32 %) as an oil.

**14** : <sup>1</sup>H NMR (400 MHz,  $\text{CDCl}_3$ )  $\delta$  1.26 (d, 3.2 Hz, 1H), 1.35 (d,  $J$  = 3.6 Hz, 3H), 1.33 (s, 3H), 1.74 (s, 3H), 1.89 – 1.95 (m, 1H), 1.99 – 2.07 (m, 1H), 2.31 (dd,  $J$  = 14.8, 4.0 Hz, 1H), 2.35 – 2.37 (m, 3H), 2.97 (t,  $J$  = 12.8 Hz, 1H), 3.64 (d,  $J$  = 8.0 Hz, 1H), 4.27 (dd,  $J$  = 12.2, 3.8 Hz, 1H), 6.07 (s, 1H). <sup>13</sup>C NMR (100 MHz,  $\text{CDCl}_3$ )  $\delta$  14.2, 20.9, 20.9, 21.2, 23.3, 30.2, 37.5, 37.8, 50.8, 84.6, 87.1, 120.1, 131.2, 139.3, 139.6, 153.9.; IR (neat)  $\nu_{\max}$  2960, 2927, 1805, 1466, 1383  $\text{cm}^{-1}$ . HRMS[ES+] calcd for  $\text{C}_{16}\text{H}_{22}\text{O}_3$  [M + Na]<sup>+</sup> 285.1467, found 285.1462.

**15** : <sup>1</sup>H NMR (400 MHz,  $\text{CDCl}_3$ )  $\delta$  1.04 (t,  $J$  = 7.6 Hz, 6H), 1.17 (s, 3H), 1.73 – 1.78 (m, 1H), 1.77 (s, 3H), 2.03 (m, 1H), 2.38 (sext, 4H), 2.67 (dd,  $J$  = 17.2, 4.4 Hz, 1H), 3.03 (m, 1H), 4.42 (dd,  $J$  = 12.0, 4.4 Hz, 1H), 6.19 (s, 1H). <sup>13</sup>C NMR (100 MHz,  $\text{CDCl}_3$ )  $\delta$  13.0, 14.5, 21.5, 22.1, 23.8, 28.4, 37.7, 39.0, 54.9, 84.9, 87.5, 118.5,

<sup>8</sup> Stewart, I.C.; Ung, T.; Pletnev, A.A.; Berlin, J.M.; Grubbs, R.H.; Schrodi, Y. *Org. Lett.* **2007**, *9*, 1589.



129.4, 137.1, 142.6, 154.9.; IR (neat)  $\nu_{\max}$  2961, 2930, 1809, 1462, 1382  $\text{cm}^{-1}$ . HRMS[ES+] calcd for  $\text{C}_{16}\text{H}_{22}\text{O}_3$  [M + Na]<sup>+</sup> 285.1467, found 285.1470.

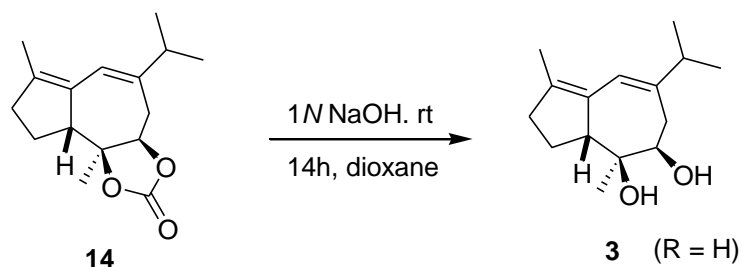

**Diol 3 (R = H).** To a stirred solution of carbonate **14** (67.2 mg, 0.256 mmol) in dioxane (3.2 mL) was added 1N NaOH (0.7 mL) and the resulting mixture was stirred for 14 h at room temperature. The reaction was quenched with saturated aq.  $\text{NH}_4\text{Cl}$  and the resulting mixture was diluted with  $\text{Et}_2\text{O}$ . After separation of layers, the aqueous layer was extracted with  $\text{Et}_2\text{O}$  (5 mL X 2) and the combined organic solution was washed with brine and water, dried over  $\text{MgSO}_4$ , and concentrated under reduced pressure. The crude product was purified by silica gel flash column chromatography to provide diol **3** (R = H) (58.7 mg, 97 %) as a colorless oil.  $^1\text{H}$  NMR (600 MHz,  $\text{CDCl}_3$ )  $\delta$  1.02 (s, 3H), 1.04 (s, 3H), 1.13 (s, 3H), 1.73 (s, 3H), 1.90 – 2.02 (m, 2H), 2.06 (dd,  $J = 16.8, 1.2$  Hz, 1H), 2.14 (s, 1H), 2.20 (dd,  $J = 16.8, 9.6$  Hz, 1H), 2.33 (quint,  $J = 6.6$  Hz, 1H), 2.41 (quint,  $J = 8.4$  Hz, 1H), 2.56 (br, 1H), 2.73 (dd,  $J = 16.2, 10.2$  Hz, 1H), 3.04 (d,  $J = 9.0$  Hz, 1H), 3.45 (d,  $J = 9.0$  Hz, 1H), 6.03 (s, 1H).  $^{13}\text{C}$  NMR (100 MHz,  $\text{CDCl}_3$ )  $\delta$  14.4, 20.7, 21.1, 21.5, 24.3, 34.4, 37.6, 37.8, 53.7, 76.8, 77.2, 119.0, 132.7, 137.2, 144.6.; IR (neat)  $\nu_{\max}$  3396, 2959, 2924, 1714, 1557, 1463, 1379  $\text{cm}^{-1}$ . HRMS[ES+] calcd for  $\text{C}_{15}\text{H}_{24}\text{O}_2$  [M + Na]<sup>+</sup> 259.1674, found 259.1685.

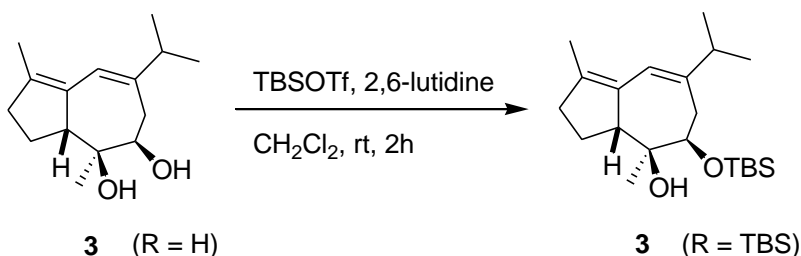

**Cyclization Substrate 3 (R = TBS).** To a stirred solution of diol **3** (R = H) (8.5 mg, 36  $\mu\text{mol}$ ) in  $\text{CH}_2\text{Cl}_2$  (2.0 mL) under argon was added 2,6-lutidine (9.2 mg, 86  $\mu\text{mol}$ ). Then TBSOTf (11.4 mg, 43.0  $\mu\text{mol}$ ) was added dropwise and the resulting mixture was stirred for 2 h, quenched with water, and diluted with  $\text{CH}_2\text{Cl}_2$ . The aqueous layer was extracted with  $\text{CH}_2\text{Cl}_2$  (1 mL X 3) and the combined organic solution was dried over  $\text{MgSO}_4$ , concentrated under reduced pressure, and subjected to silica gel flash column chromatography (elution with  $\text{EtOAc} : \text{hexane} = 1 : 20$ ). Alcohol **3** (R = TBS) (11.7 mg, 93 %) was isolated as a pale yellow oil.  $^1\text{H}$  NMR (400 MHz,  $\text{CDCl}_3$ )  $\delta$  0.08 (s, 3H), 0.12 (s, 3H), 0.92 (s, 9H), 1.03 (dd,  $J = 6.8, 1.6$  Hz, 6H), 1.04 (s, 3H), 1.74 (s, 3H), 1.81 (dd,  $J = 20.8, 1.6$  Hz, 1H), 1.90 – 1.98 (m, 1H), 2.02 – 2.07 (m,

1H), 2.17 (dd,  $J = 16.7, 9.6$  Hz, 1H), 2.31 (quint,  $J = 6.8$  Hz, 1H), 2.37 – 2.46 (m, 1H), 2.89 (dd,  $J = 16.8, 9.6$ , 1H), 3.03 (d,  $J = 4.8$  Hz, 1H), 3.11 (s, 1H), 3.43 (dd,  $J = 10.8, 1.6$  Hz, 1H), 6.02 (s, 1H).  $^{13}\text{C}$  NMR (100 MHz,  $\text{CDCl}_3$ )  $\delta$  -4.8, -3.8, 14.3, 18.0, 21.2, 21.5, 21.9, 24.7, 25.9, 34.3, 37.8, 37.9, 53.1, 76.0, 78.8, 119.1, 133.1, 136.8, 145.2. IR (neat)  $\nu_{\text{max}}$  3544, 2956, 2930, 2857, 1651, 1472, 1361  $\text{cm}^{-1}$ . HRMS[ES+] calcd for  $\text{C}_{21}\text{H}_{38}\text{O}_2\text{Si}$  [ $\text{M} + \text{Na}$ ] $^+$  373.2539, found 373.2535.

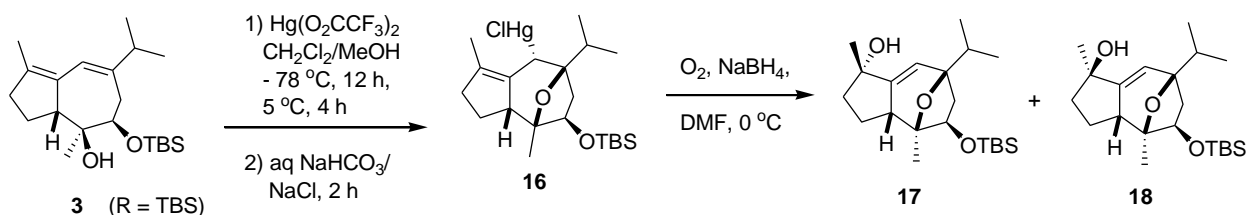

**Alcohols 17 and 18.** Oxymercuration was carried out according to a hybrid procedure derived from related literature.<sup>9</sup> To a stirred solution of alcohol **3** (R = TBS, 16.0 mg, 45.6  $\mu\text{mol}$ ) in  $\text{CH}_2\text{Cl}_2$  (2 mL) under argon was added MeOH (5.0 mg) at room temperature. The reaction mixture was cooled to  $-78\text{ }^\circ\text{C}$ ,  $\text{Hg(O}_2\text{CCF}_3)_2$  (23.8 mg, 54.8  $\mu\text{mol}$ ) was added, and stirring was continued for 24 h. Then additional  $\text{Hg(O}_2\text{CCF}_3)_2$  (5.9 mg, 14  $\mu\text{mol}$ ) was added and the reaction mixture was slowly warmed to  $5\text{ }^\circ\text{C}$  over 3.5 h. The reaction was quenched with saturated aq.  $\text{NaHCO}_3$  (2 mL) and then saturated aq.  $\text{NaCl}$  (2 mL). The resulting mixture was stirred at room temperature for 2 h, and then extracted with  $\text{Et}_2\text{O}$  (5 mL X 3). The ether solution was washed with brine and then with water, dried over  $\text{MgSO}_4$ , and concentrated under reduced pressure to provide an organomercurial intermediate **16**. Without further purification, the crude product was directly used for the next step. **16**:  $^1\text{H}$  NMR (600 MHz,  $\text{CDCl}_3$ )  $\delta$  0.02 (s, 3H), 0.30 (s, 3H), 0.88 (s, 9H), 1.2 (d,  $J = 6.0$  Hz, 1H), 1.45 (s, 3H), 1.17 (d,  $J = 6.6$  Hz, 1H), 1.26 – 1.34 (m, 1H), 1.81 – 1.96 (m, 4H), 2.00 (s, 3H), 2.31 – 2.40 (m, 2H), 2.71 (m, 1H), 2.93 (s, 1H), 3.99 (dd,  $J = 7.2, 3.0$  Hz, 1H).

Oxidative demercuration was accomplished according to Hill and Whitesides.<sup>10</sup> A stream of oxygen gas was bubbled into a solution of  $\text{NaBH}_4$  (9.5 mg, 0.11 mmol) in DMF (3.5 mL) at  $0\text{ }^\circ\text{C}$  for 30 min. To the resulting mixture was added dropwise a solution of the alkylmercurial **16** in DMF (0.7 mL) by syringe pump at  $0\text{ }^\circ\text{C}$  for 1 h. During this time, oxygen bubbling was continued. The syringe was filled with DMF (0.2 mL) and this wash was added dropwise (oxygen bubbling continued). When addition was complete, the resulting mixture was warmed slowly to room temperature over 2.5 h (oxygen bubbling continued). The reaction mixture was quenched with 1N HCl, diluted with  $\text{Et}_2\text{O}$  (15 mL), and filtered through Celite. Water and  $\text{Et}_2\text{O}$  were added to the filtrate and the layers were separated. The organic solution was dried over  $\text{MgSO}_4$  and concentrated under reduced pressure. The residue was subjected to silica gel

<sup>9</sup> (a) Broka, C. A.; Lim, Y.-T. *J. Org. Chem.* **1988**, *53*, 5876. (b) Kang, S.H.; Kim, M.; Kang, S. Y. *Angew. Chem. Int. Ed.* **2004**, *43*, 6177 (c) Ushakov, D. B.; Navickas, V.; Ströbele, M.; Maichle-Mössmer, C.; Sasse, F.; Maier, M.E. *Org. Lett.* **2011**, *13*, 2090.

<sup>10</sup> Hill, C. L.; Whitesides, G.M. *J. Am. Chem. Soc.* **1974**, *96*, 870.

Flash column chromatography (elution with EtOAc : hexane = 1 : 3) to afford the known **17** (9.2 mg, 55 % for 2 steps) as an oil and its isomer **18** (6.2 mg, 37 % for 2 steps), also as an oil.

Compound **17** :  $^1\text{H}$  NMR (600 MHz,  $\text{CDCl}_3$ )  $\delta$  0.02 (s, 6H), 0.88 (s, 9H), 0.93 (d,  $J$  = 6.0 Hz, 3H), 0.97 (d,  $J$  = 6.0 Hz, 3H), 1.26 (s, 3H), 1.36 (s, 3H), 1.39 – 1.41 (m, 1H), 1.56 – 1.58 (m, 2H), 1.73 – 1.78 (m, 3H), 1.91 (hept,  $J$  = 6.6 Hz, 1H), 2.30 (dd,  $J$  = 11.4, 7.8 Hz, 1H), 2.70 (m, 1H), 4.13 (t,  $J$  = 6.0, 1H), 5.72 (s, 1H).  $^{13}\text{C}$  NMR (100 MHz,  $\text{CDCl}_3$ )  $\delta$  -4.9, -4.5, 17.8, 17.7, 18.0, 20.7, 23.5, 25.8, 28.0, 34.1, 41.0, 50.2, 51.0, 73.4, 77.4, 83.3, 85.1, 119.3, 148.9.; IR (neat)  $\nu_{\text{max}}$  3419, 2959, 2929, 2857, 1472, 1386  $\text{cm}^{-1}$ .  $^1\text{H}$  NMR and  $^{13}\text{C}$  NMR data were consistent with the reported values.<sup>11</sup>

Compound **18** :  $^1\text{H}$  NMR (400 MHz,  $\text{CDCl}_3$ )  $\delta$  0.01 (s, 3H), 0.02 (s, 3H), 0.88 (s, 9H), 0.94 (d,  $J$  = 6.8 Hz, 3H), 0.97 (d,  $J$  = 6.8 Hz, 3H), 1.17 – 1.24 (m, 1H), 1.26 (s, 3H), 1.37 (s, 3H), 1.60 (m, 1H), 1.70 (m, 1H), 1.84 – 1.97 (m, 1H), 2.26 (dd,  $J$  = 11.2, 7.2, 1H), 3.07 (td,  $J$  = 9.2, 2.4 Hz, 1H), 4.01 (m, 1H), 5.65 (d,  $J$  = 2.8 Hz, 1H).  $^{13}\text{C}$  NMR (100 MHz,  $\text{CDCl}_3$ ) -5.0, -4.5, 17.7, 17.8, 18.0, 20.7, 22.9, 25.5, 25.8, 34.0, 40.8, 49.5, 50.8, 73.4, 77.1, 83.1, 85.2, 120.0, 146.7.; IR (neat)  $\nu_{\text{max}}$  3373, 2959, 2930, 2857, 1463, 1386  $\text{cm}^{-1}$ .

## 2-(1-Methylethyl)-2-propen-1-ol

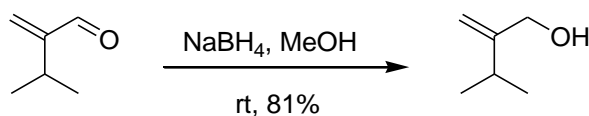

2-(1-Methylethyl)-2-propenal, was prepared according to Breit et al.<sup>12</sup> To a stirred solution of this aldehyde (3.04 g, 30.1 mmol) in MeOH (50 mL) was added NaBH<sub>4</sub> (1.17 g, 30.1 mmol) at 0 °C. After stirring at room temperature for 1 h, the reaction was quenched with saturated NH<sub>4</sub>Cl (8 mL). The resulting mixture was diluted with H<sub>2</sub>O (12 mL) and Et<sub>2</sub>O (20 mL) then filtered through Celite to remove the white solids. Volatile organic solvent was carefully removed under reduced pressure (note the volatility of the product) and the residue was extracted with CH<sub>2</sub>Cl<sub>2</sub> (15 mL X 4). The combined organic solution was concentrated and purified by silica gel column chromatography (elution with EtOAc : Hexane = 1 : 9) to provide 2-(1-methylethyl)-2-propen-1-ol (2.51 g, 81 %).  $^1\text{H}$  NMR (400 MHz,  $\text{CDCl}_3$ )  $\delta$  1.00 (s, 3H), 1.01 (s, 3H), 2.26 (sept,  $J$  = 6.8 Hz, 1H), 2.43 (br, 1H), 4.05 (s, 2H), 4.82 (m, 1H), 4.94 (m, 1H).  $^1\text{H}$  NMR data were consistent with the reported values.<sup>13</sup>

2-Bromo-methyl-3-methyl-1-butene (**12**) was prepared from this alcohol according to Barton et al.<sup>13</sup>

<sup>11</sup> Molawi, K.; Delpont, N; Echavarren, A. M. *Angew. Chem. Int. Ed.* **2010**, *49*, 3517-3519

<sup>12</sup> Breit, B.; Heckmann, G.; Zahn, S. K. *Chem. Euro. J.* **2003**, *9*, 425.

<sup>13</sup> Barton, D. H.; Shioiri, T.; Widdowson, D. A.; *J. Chem. Soc. C*, **1971**, 1968

Difference NOE for compound **14**

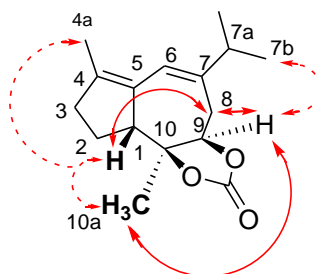

Difference NOE chart for compound **14**

| Inverted peak (C <sub>number</sub> , ppm) | Enhanced peaks (C <sub>number</sub> , ppm)                                                                                                                                         |
|-------------------------------------------|------------------------------------------------------------------------------------------------------------------------------------------------------------------------------------|
| CH <sub>3</sub> (10a, 1.33)               | CH <sub>2</sub> (2, 1.89 – 1.95), CH <sub>2</sub> (2.35 – 2.37), CH (9, 4.27)                                                                                                      |
| CH (1, 3.64)                              | CH <sub>3</sub> (10a, 1.33), CH <sub>3</sub> (4a, 1.74), CH <sub>2</sub> (1.89 – 1.95), CH <sub>2</sub> (2, 1.99 – 2.07), CH <sub>2</sub> (2.35 – 2.37), CH <sub>2</sub> (8, 2.97) |
| CH (9, 4.27)                              | CH <sub>3</sub> (7b, 1.04), CH <sub>3</sub> (10a, 1.33), CH <sub>2</sub> (2.31), CH <sub>2</sub> (8, 2.97)                                                                         |

Difference NOE for compound **15**

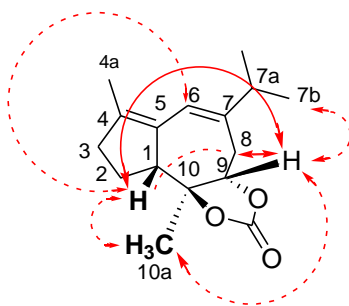

Difference NOE chart for compound **15**

| Inverted peak (C <sub>number</sub> , ppm) | Enhanced peaks (C <sub>number</sub> , ppm)                                                                                    |
|-------------------------------------------|-------------------------------------------------------------------------------------------------------------------------------|
| CH (10a, 1.17)                            | CH <sub>2</sub> (2, 1.73 – 1.78), CH <sub>2</sub> (2, 2.03), CH <sub>2</sub> (2.38), CH (1, 3.03), CH (9, 4.42), CH (6, 6.19) |
| CH (1, 3.03)                              | CH (10a, 1.17), CH <sub>2</sub> (1.73 – 1.78), CH <sub>2</sub> (2.38), CH <sub>2</sub> (2, 2.03), CH (9, 4.42), CH (6, 6.19)  |
| CH (9, 4.42)                              | CH <sub>3</sub> (7b, 1.04), CH (10a, 1.17), CH <sub>2</sub> (2.38), CH <sub>2</sub> (8, 2.67), CH (1, 3.03), CH (6, 6.19)     |



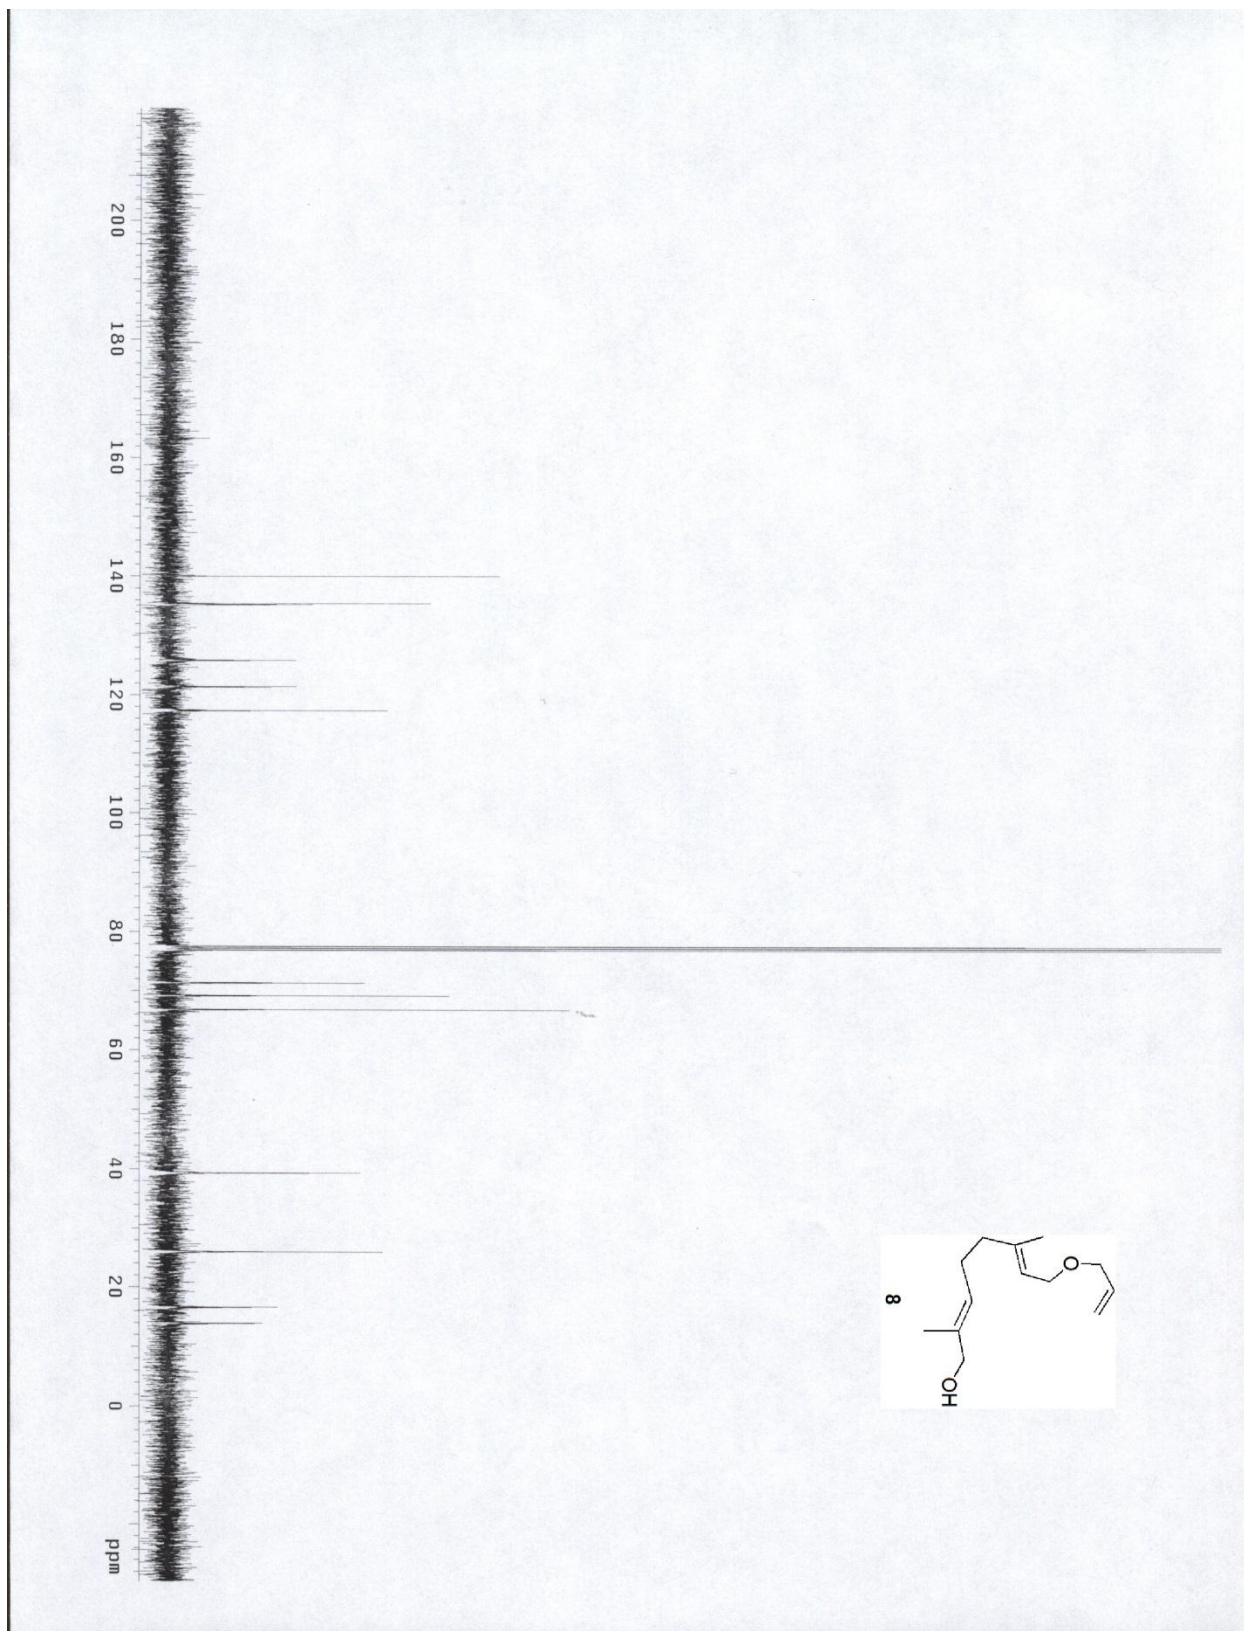

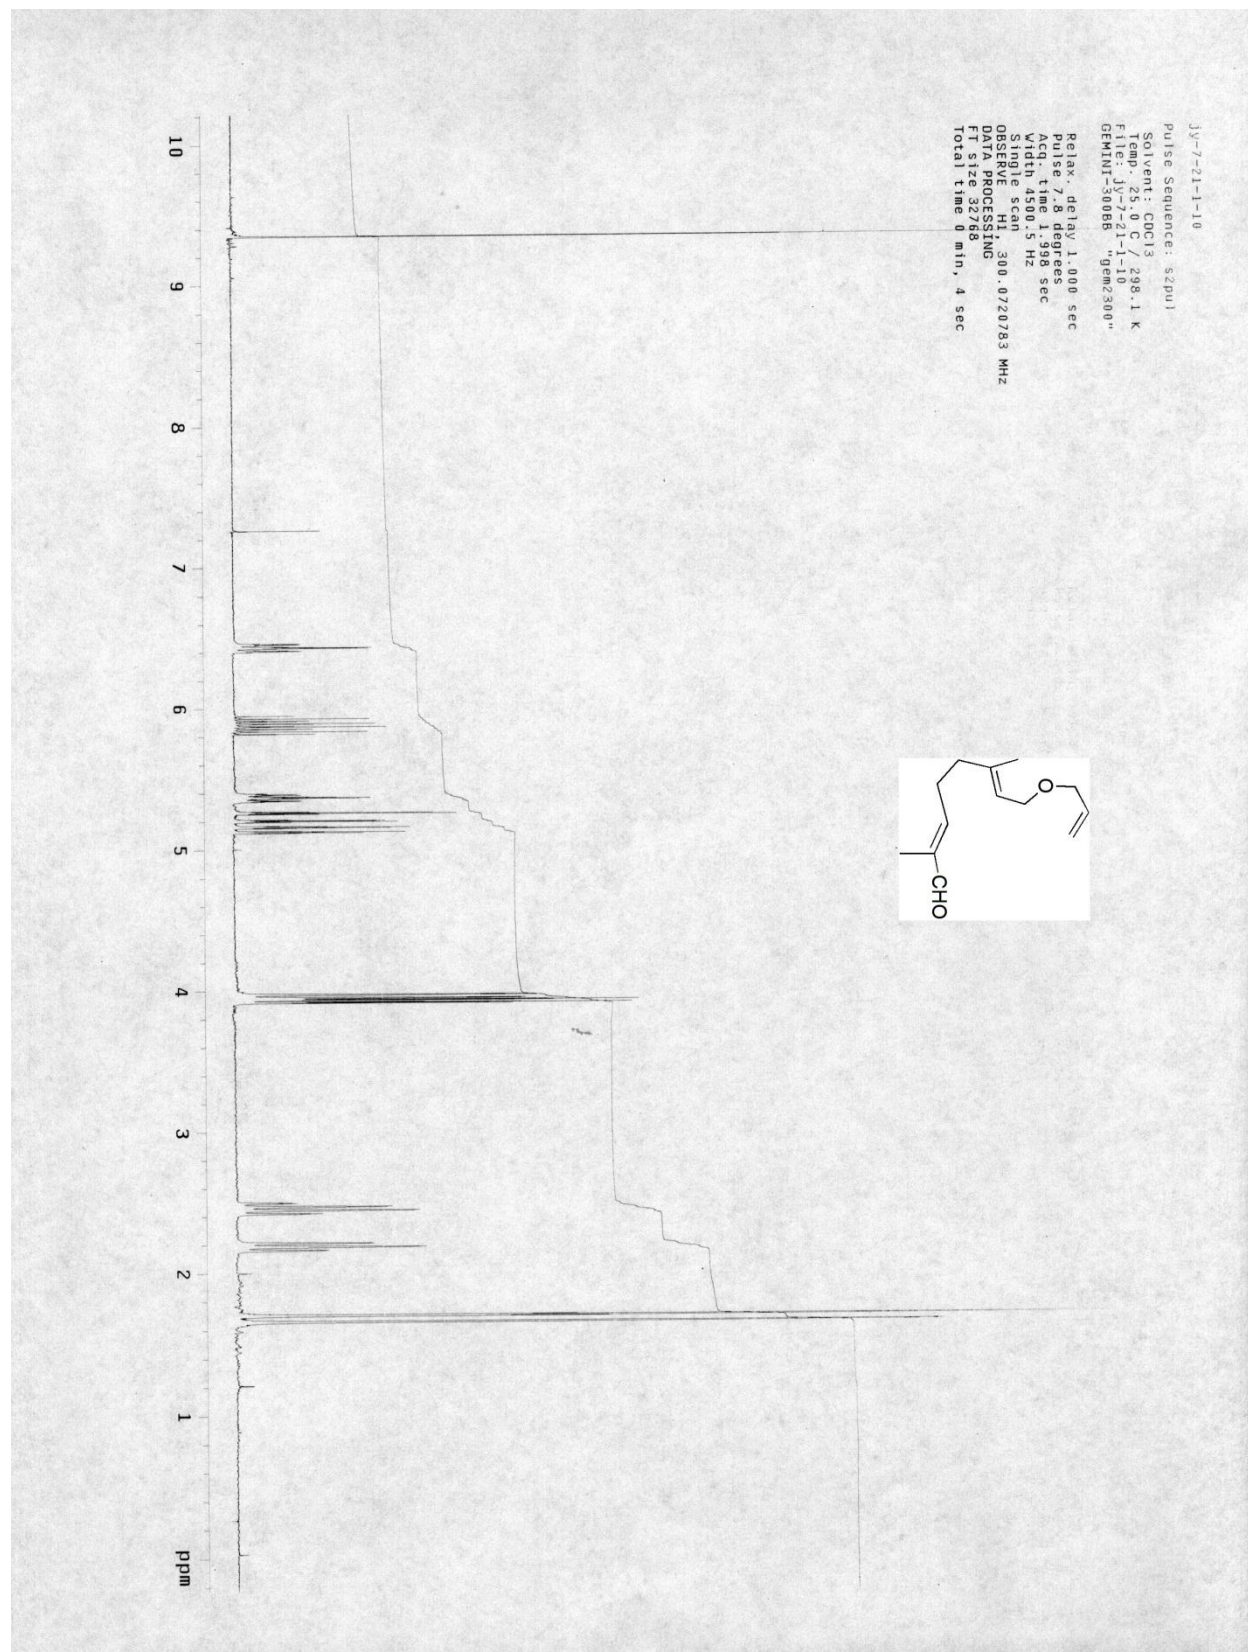

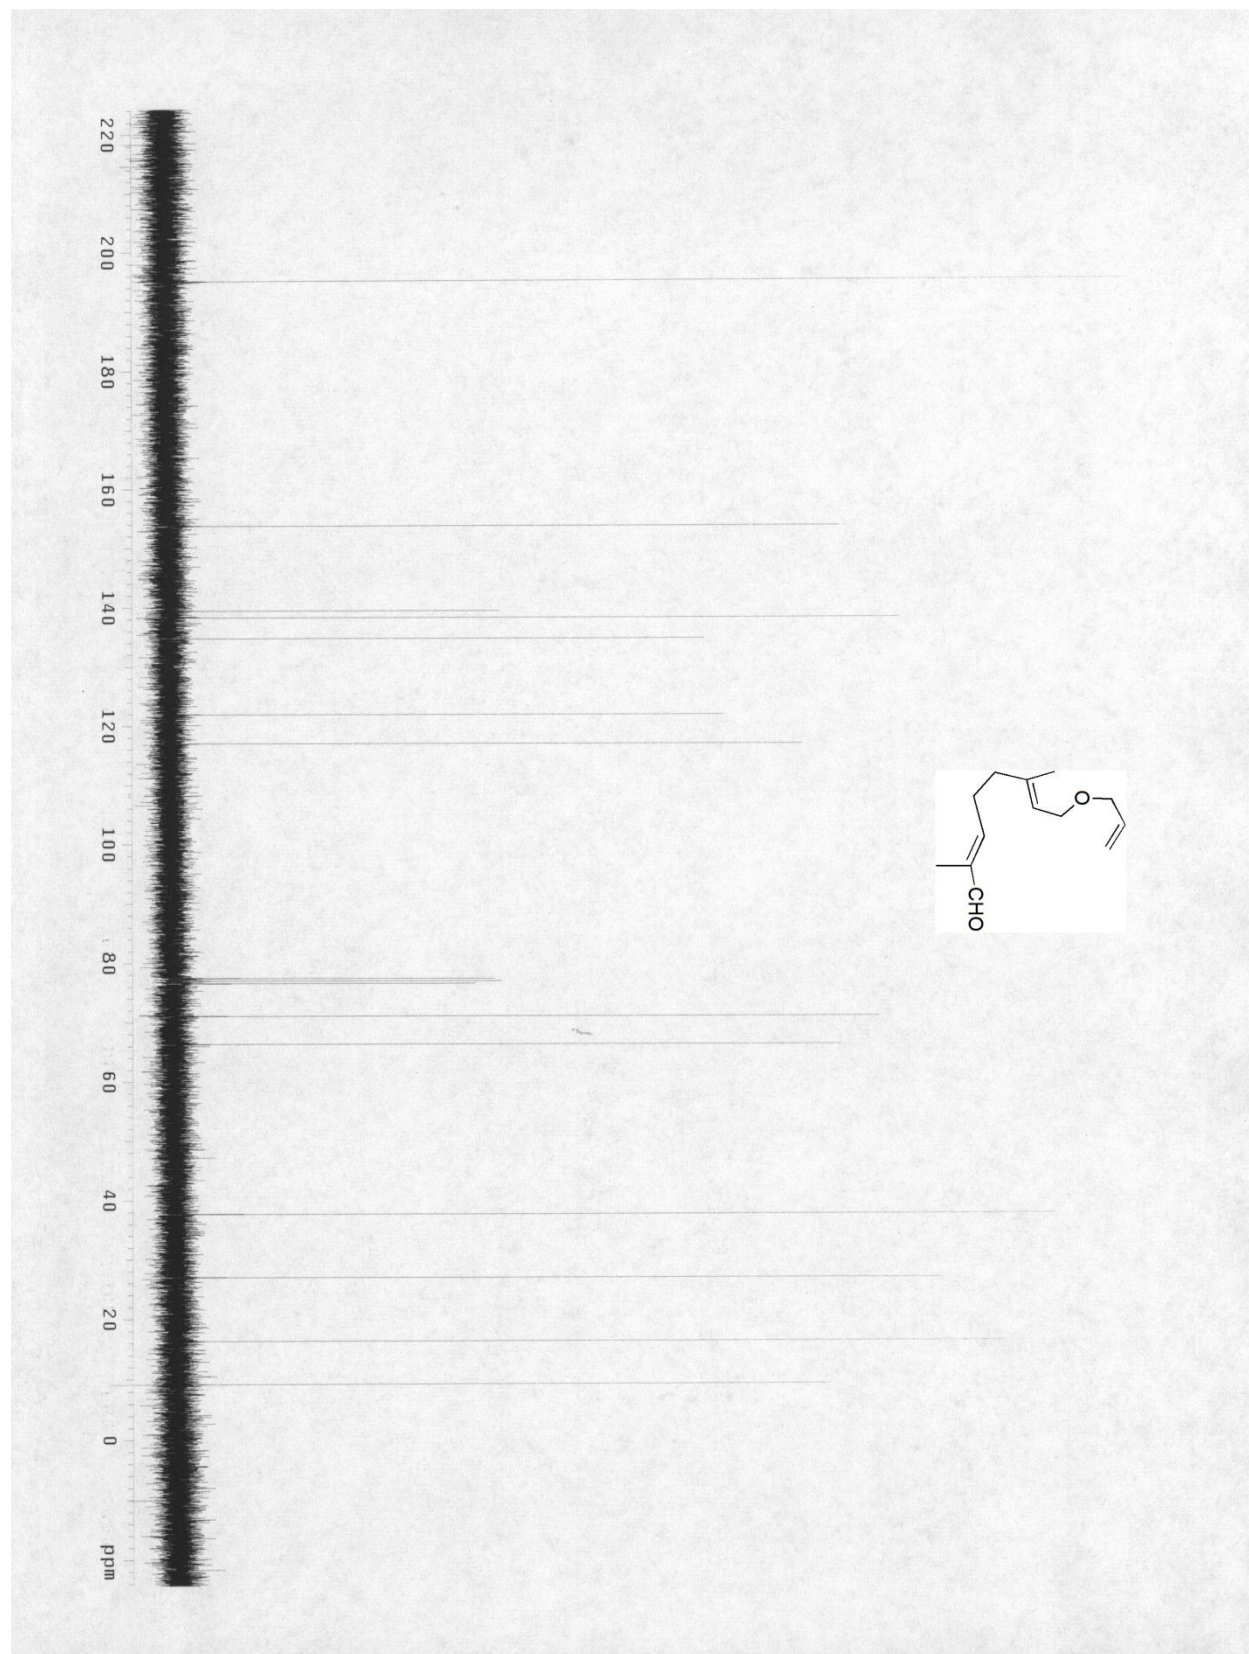



Jy-6-14-3-11  
 Data Collected on:  
 InV500-1nova500  
 Archive directory:  
 /export/home/jungylee/vnmr/sys/data  
 Sample directory:  
 File: PROTON  
 Pulse Sequence: s2pu1  
 Solvent: CDCl3  
 Temp: 25.0 C / 298.1 K  
 Relax. delay 1.000 sec  
 Pulse 45.0 degrees  
 Acq. time 1.892 sec  
 Aq. date 03/04/04  
 Aq. time 13:38:14 Hz  
 MAg 200.130 MHz  
 OBSERVE H1 499.8948180 MHz  
 DATA PROCESSING  
 FT size 32768  
 Total time 3 min

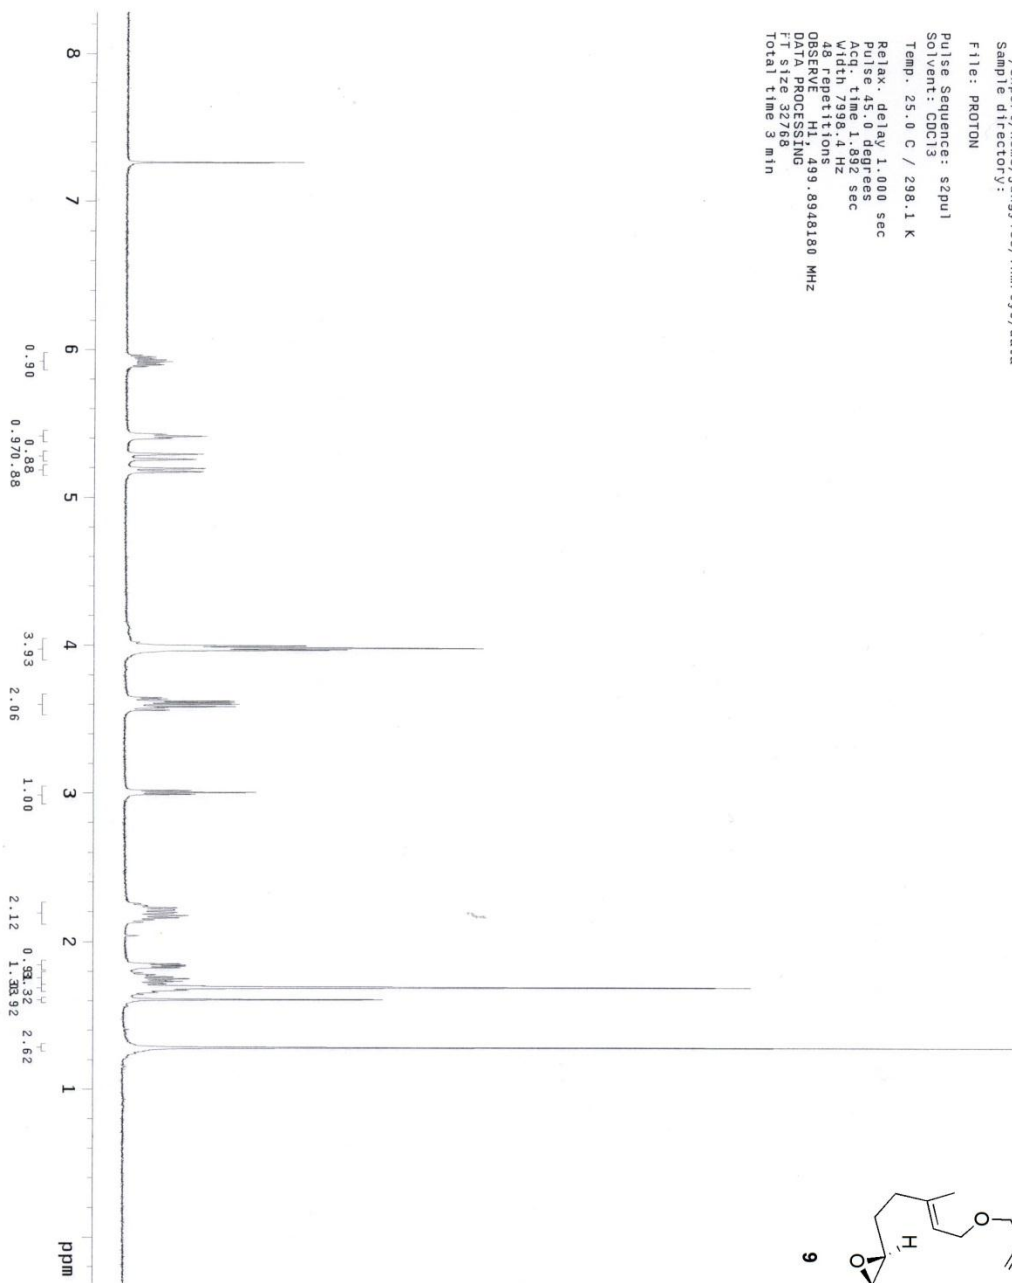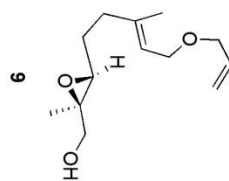

## STANDARD CARBON PARAMETERS

JY-6-14-3-11 (4623)

Data Collected on:  
Invs00-1novas00  
Archive directory:  
/export/home/jungylee/vnmr/sys/data  
Sample directory:

File: CARBON

Pulse Sequence: szpul

Solvent: CDCl3

Temp: 25.0 C / 298.1 K

User: 1-14-87

Relax. delay 1.000 sec

Pulse 45.0 degrees

Acq. time 1.300 sec

Width 31421.8 Hz

V1 prog C13

OBSERVE H1 499.8979075 MHz

DECOUPLE H1 499.8979075 MHz

Power 45 db

continuously on

WALTZ-16 modulated

DATA PROCESSING

Line broadening 0.5 Hz

F size 1.01074

Total time 1 hr, 16 min

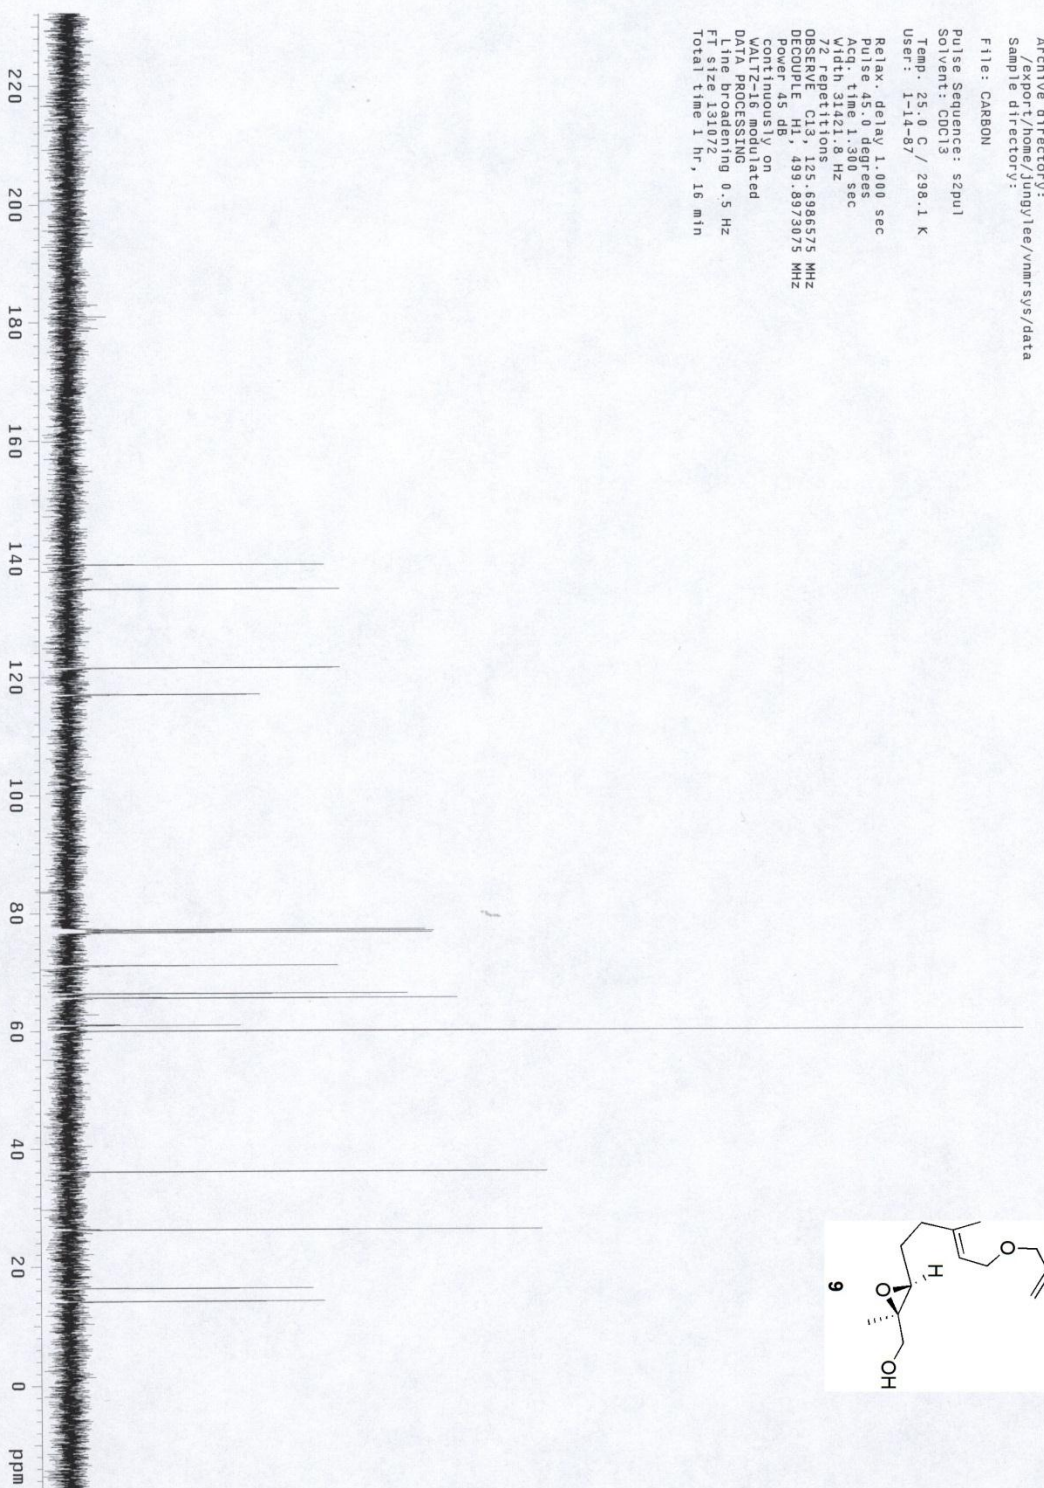

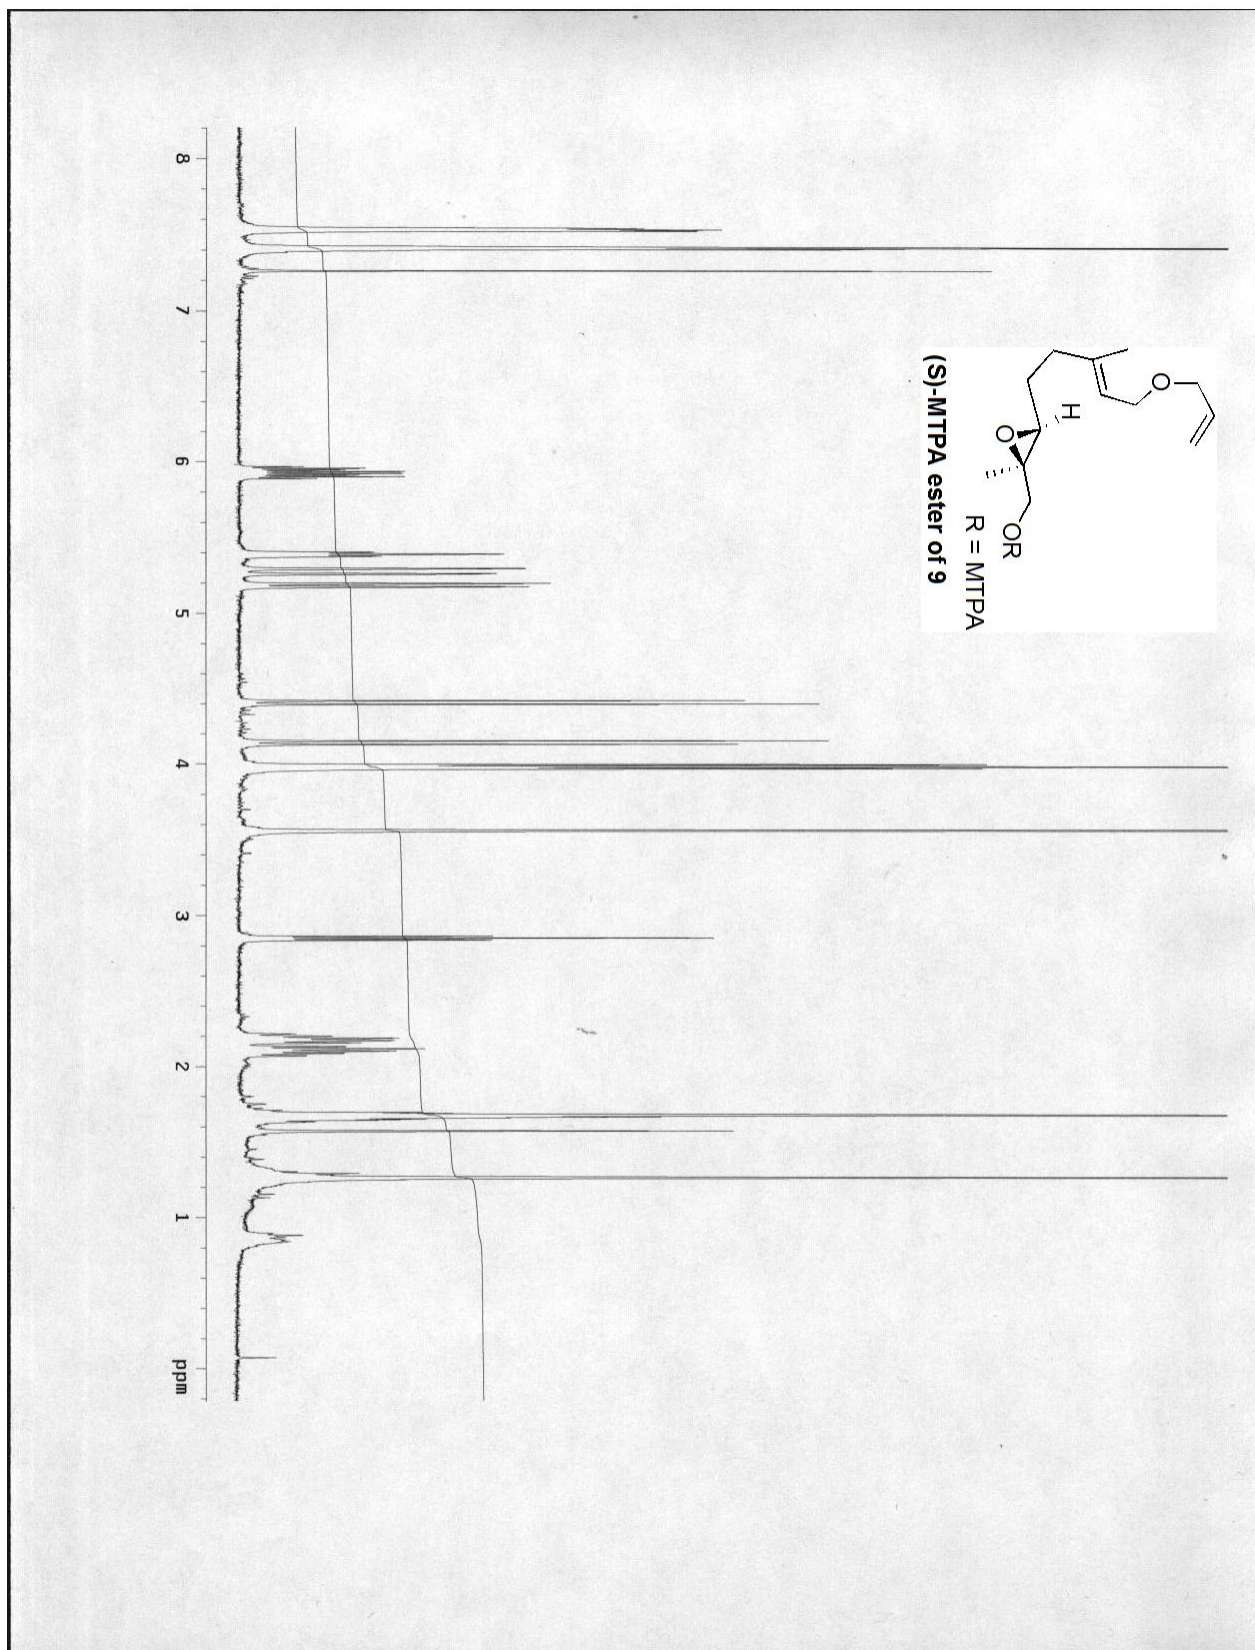

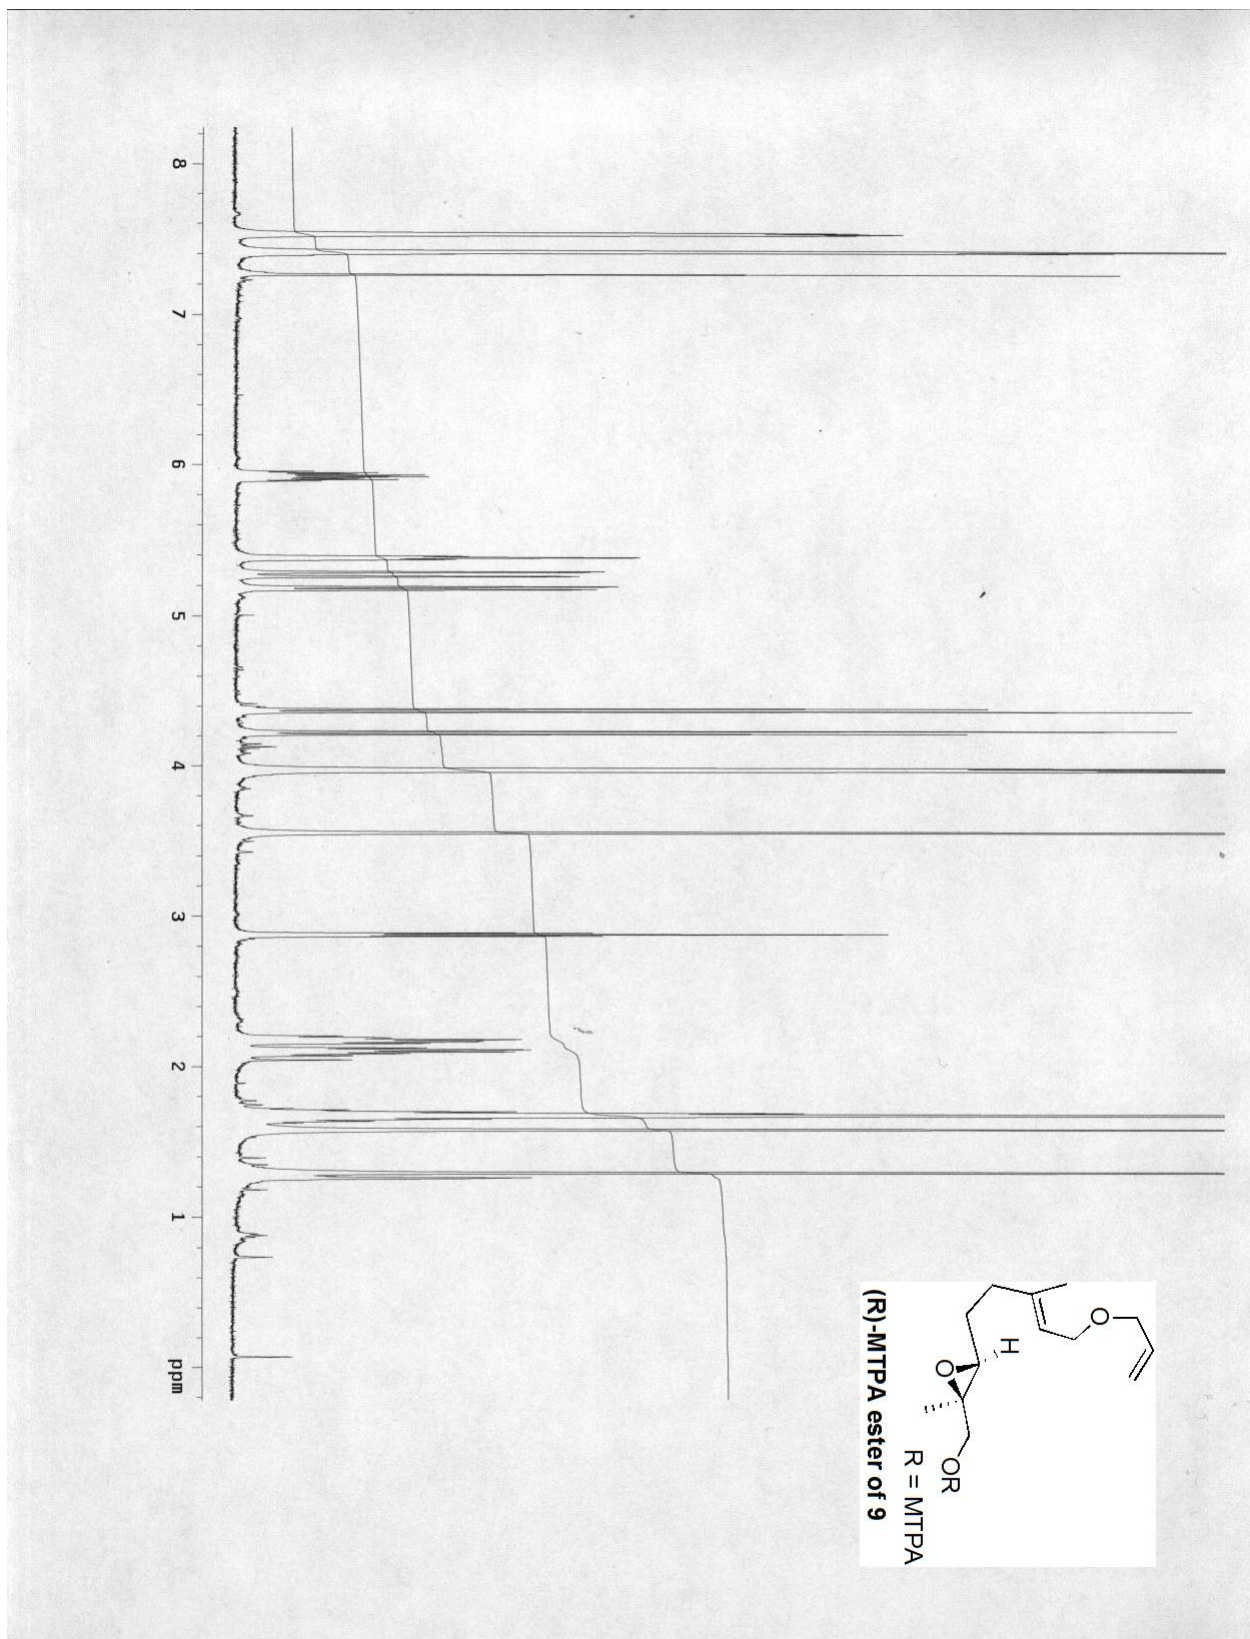

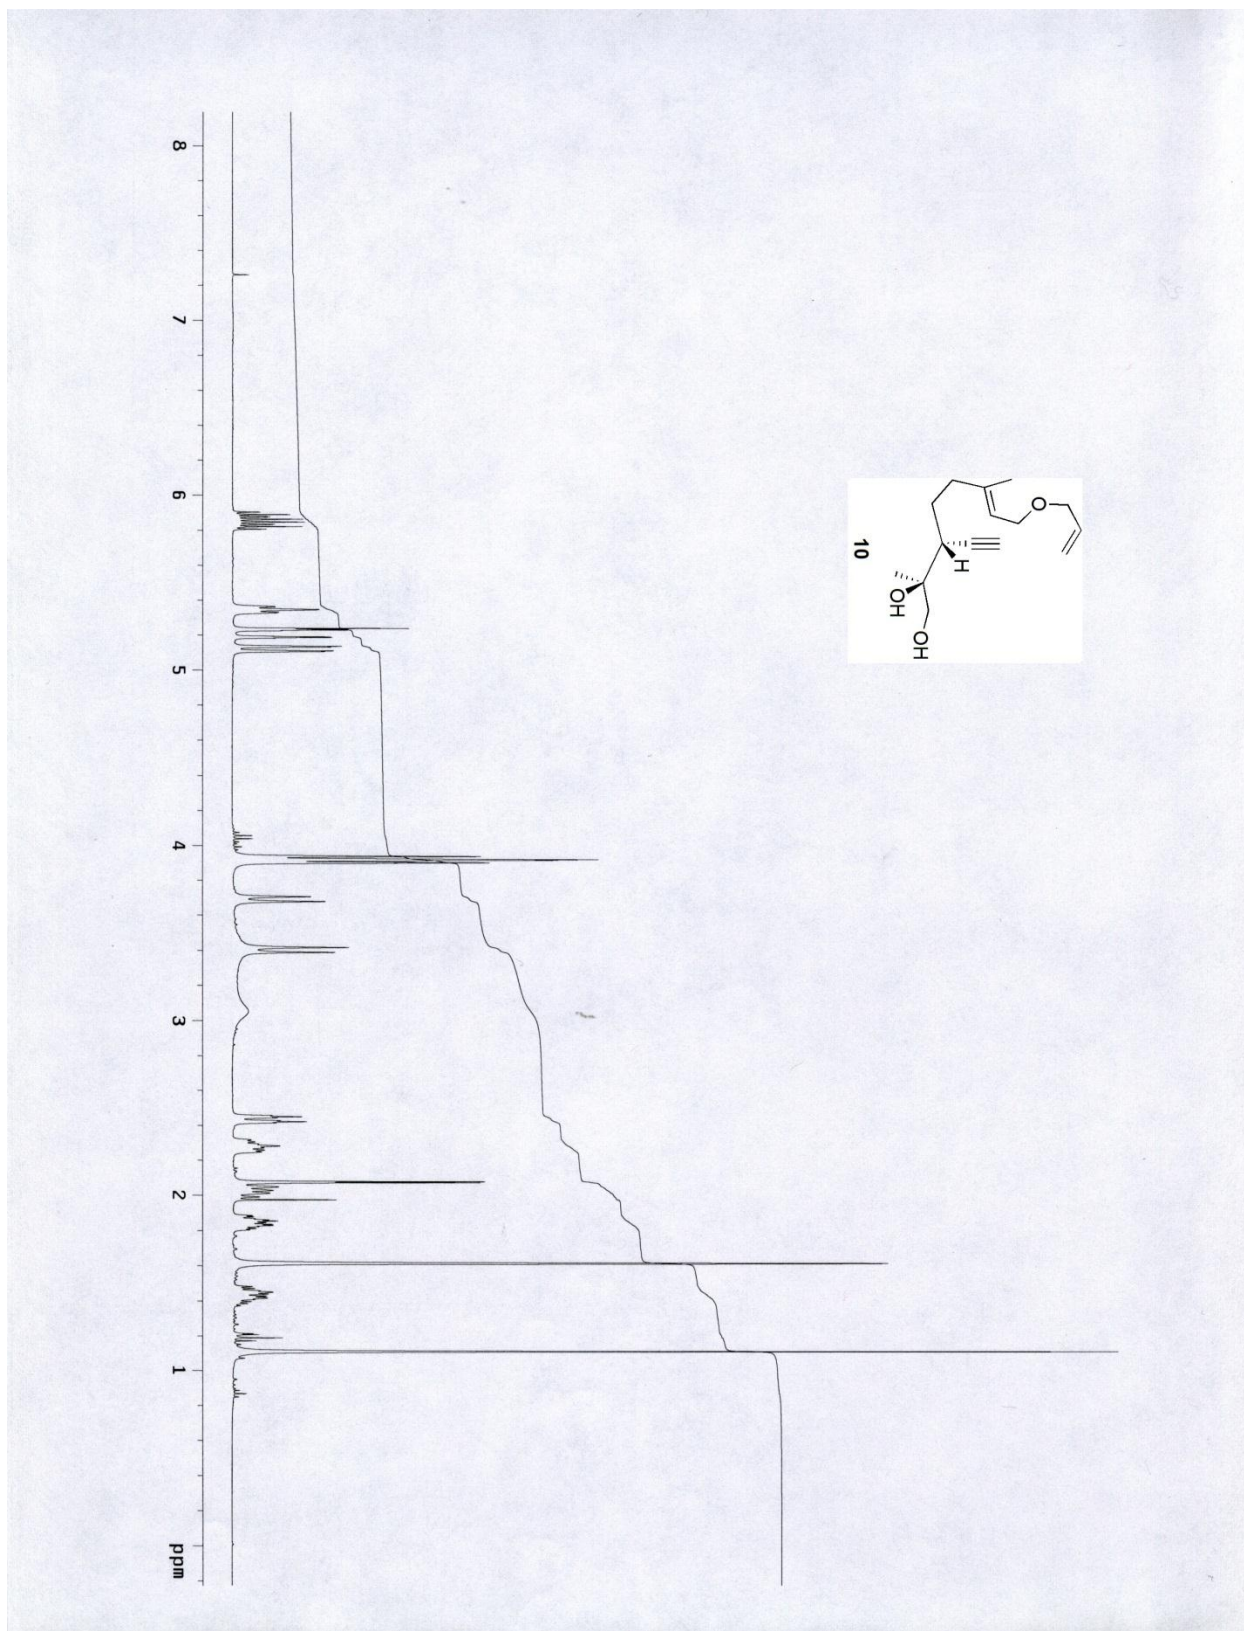

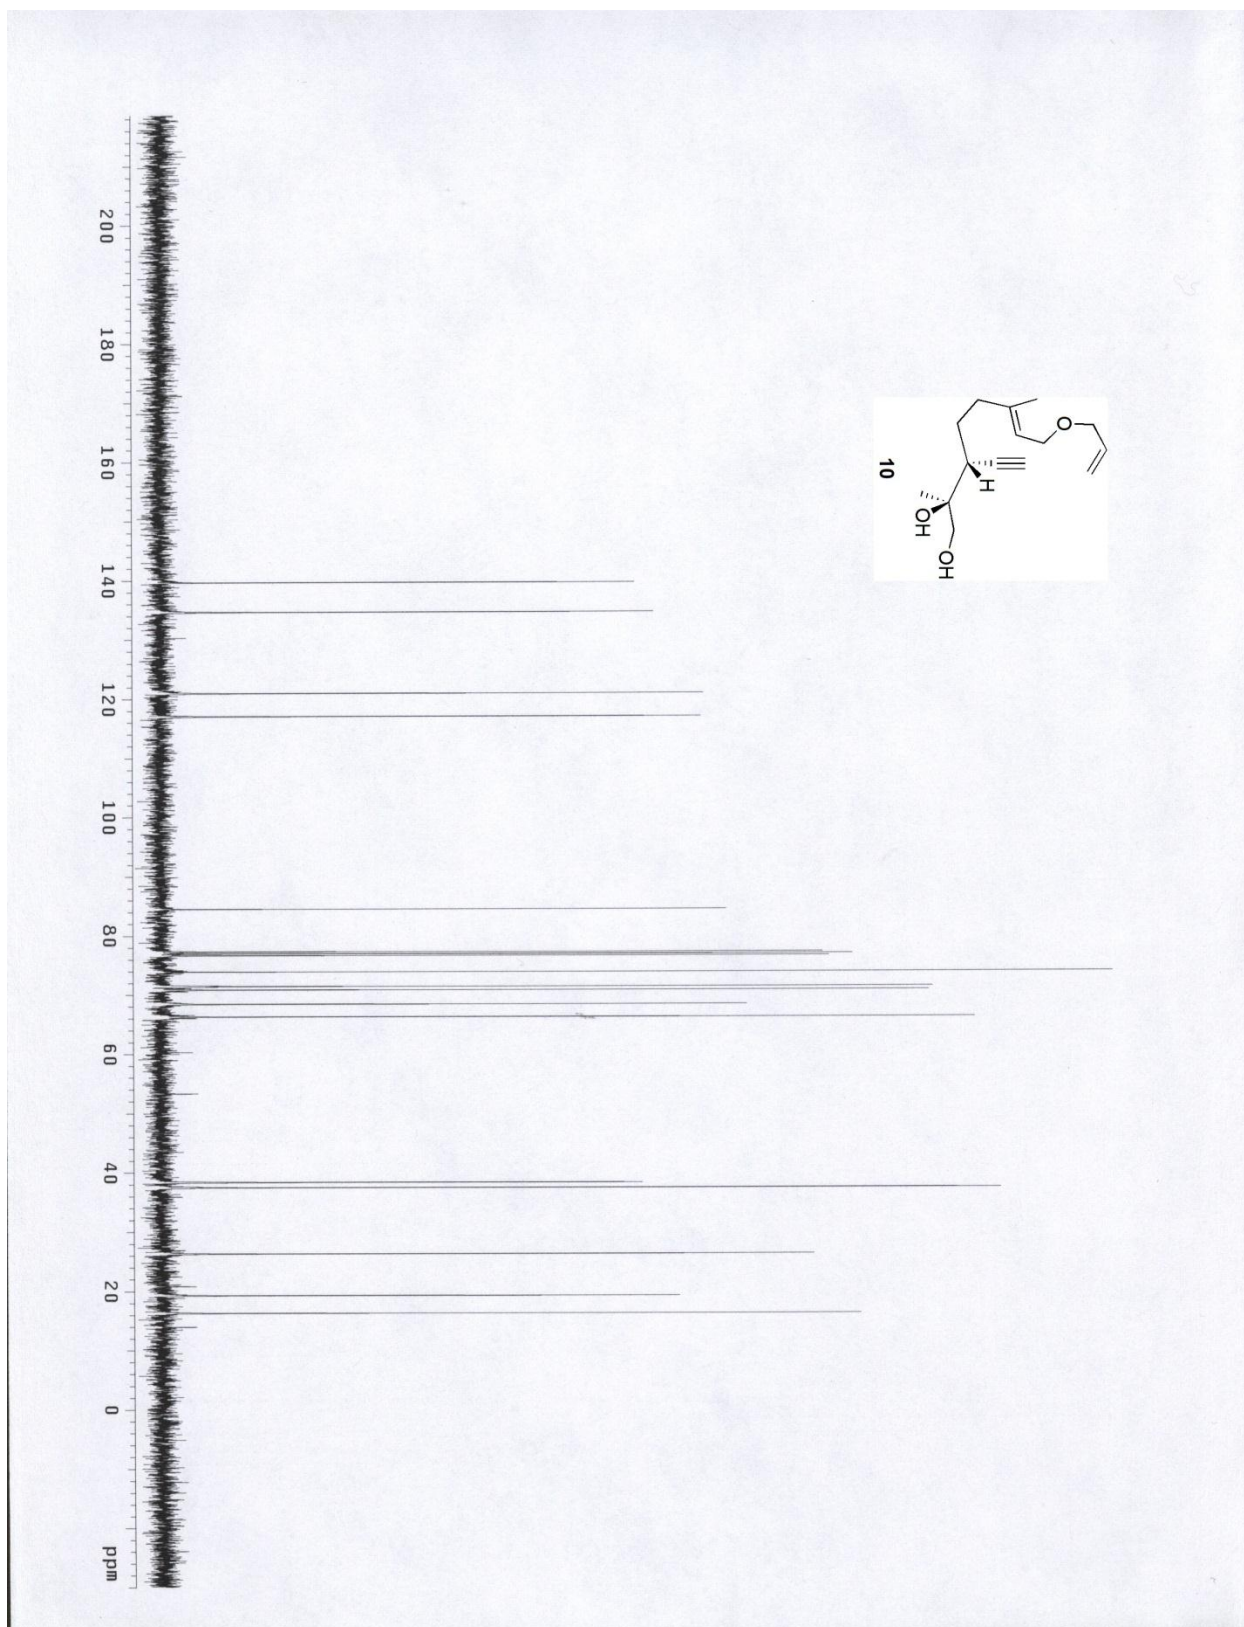

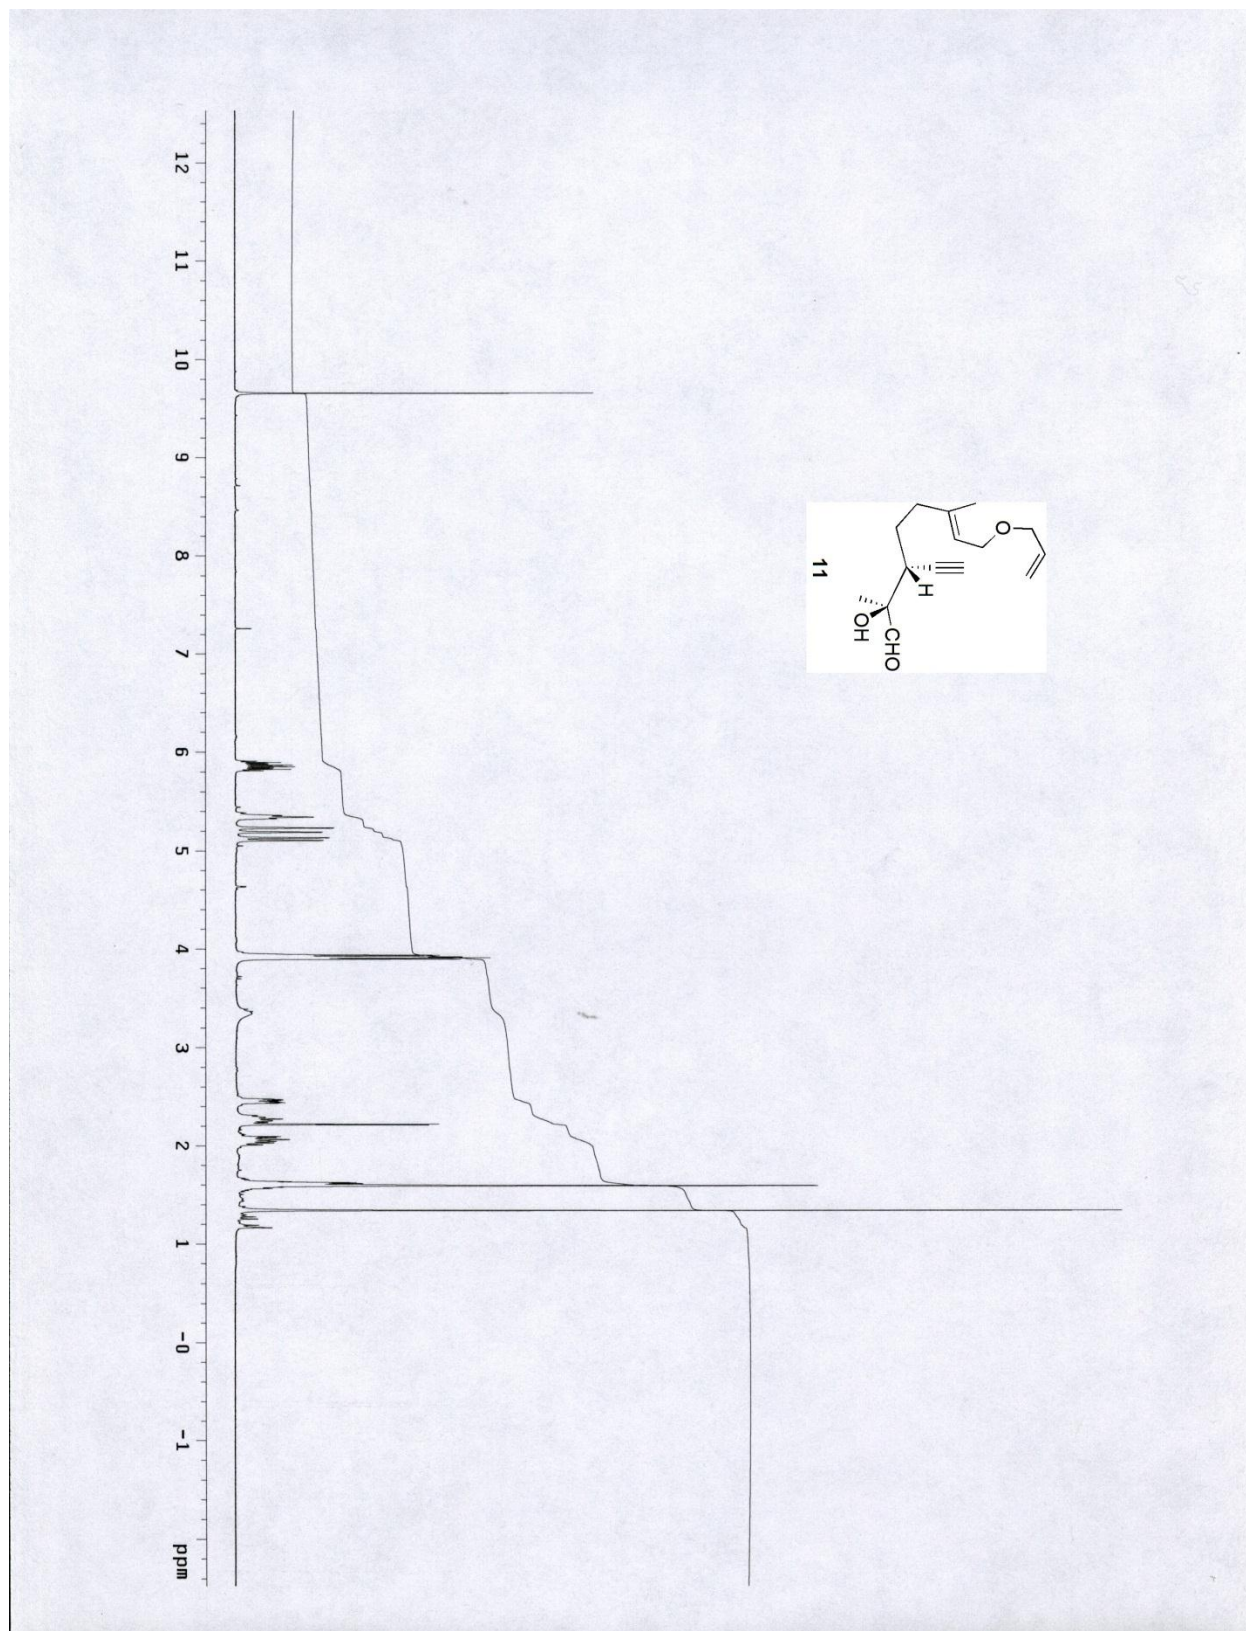

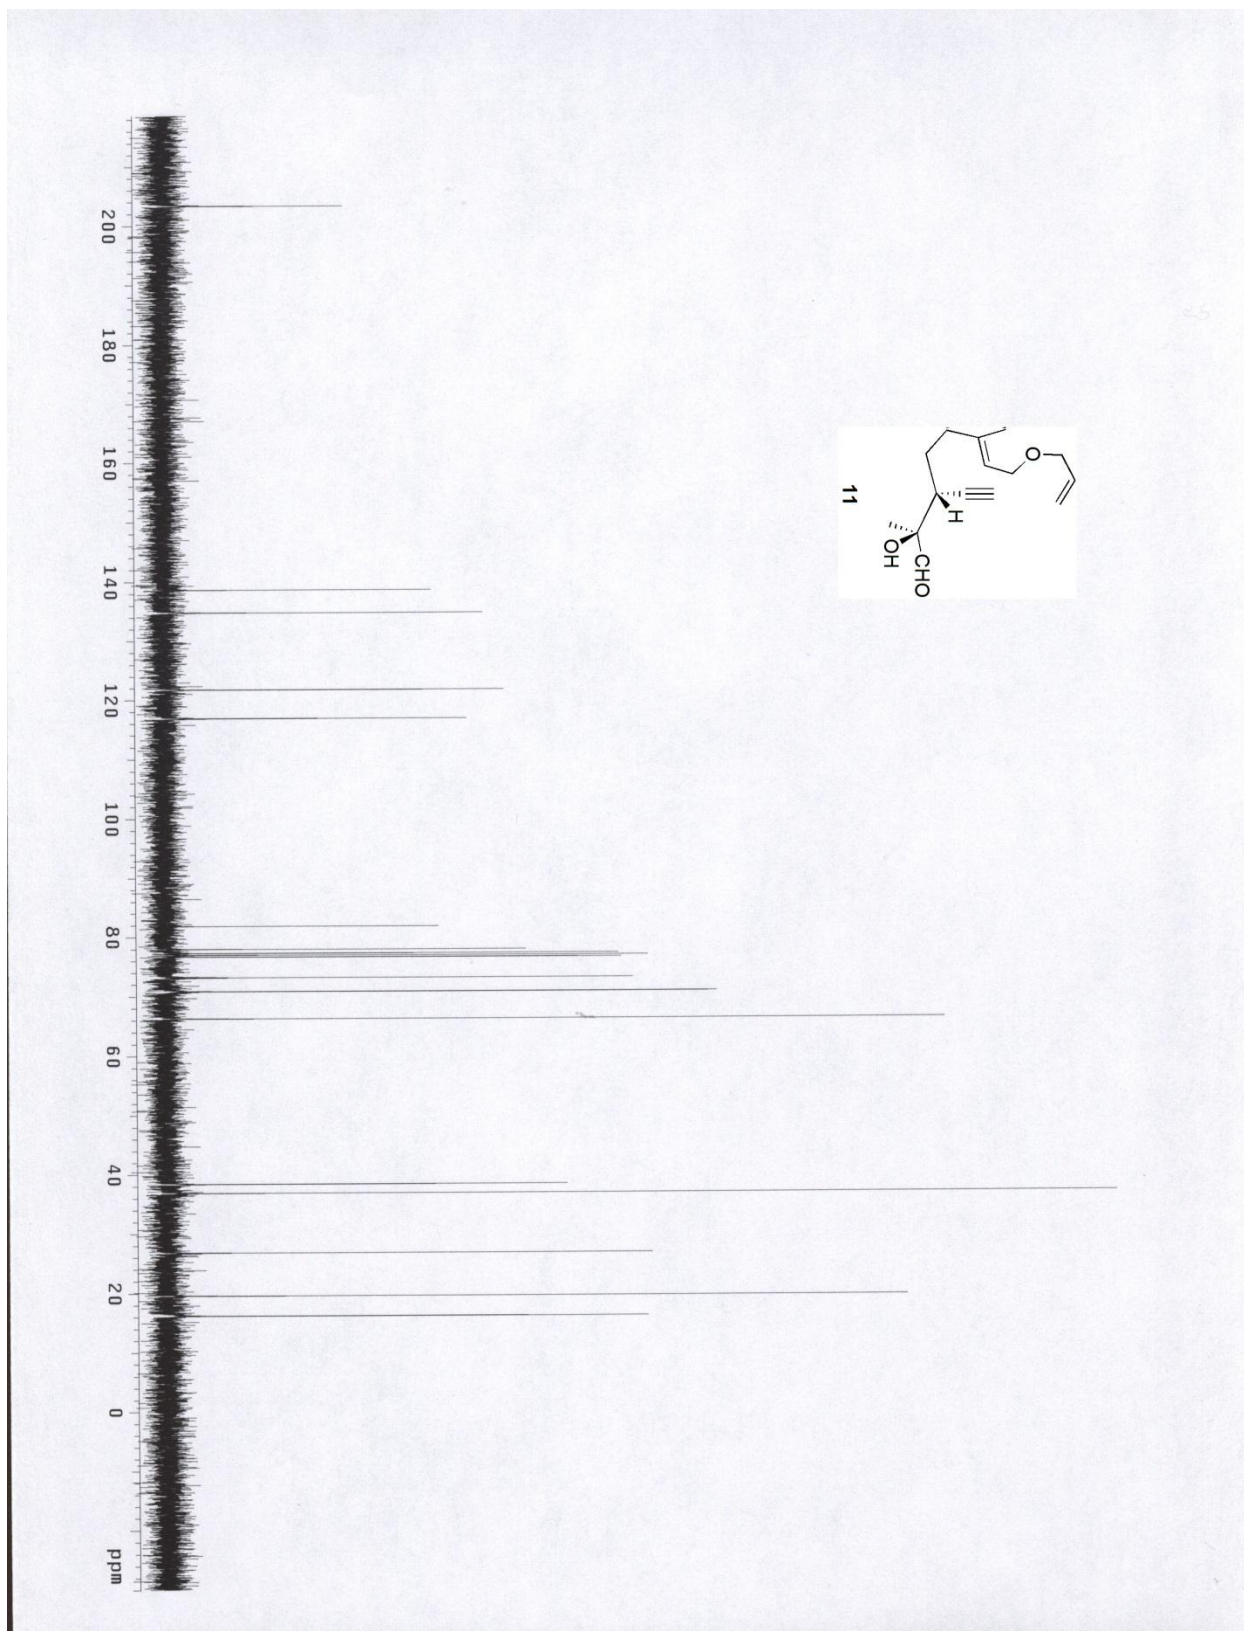



JV-12-16-1-11  
 Pulse Sequence: s2pul1  
 Solvent: CDCl3  
 Temp: 23.2-87 / 298.1 K  
 Use: 1312-87  
 INOVA-400 "Inv400"  
 Relax: delay 1.000 sec  
 Pulse: 30.0 degrees  
 Acq. time 3.279 sec  
 Width 6000.6 Hz  
 16 repetitions  
 OBSERVE H1, 399.8314100 MHz  
 DATA PROCESSING  
 FT size 131072  
 Total time 2 min, 17 sec

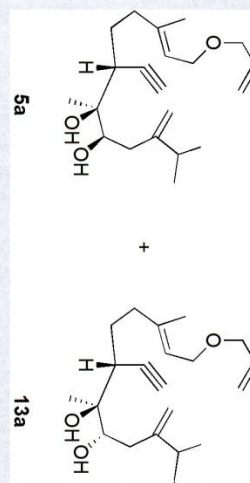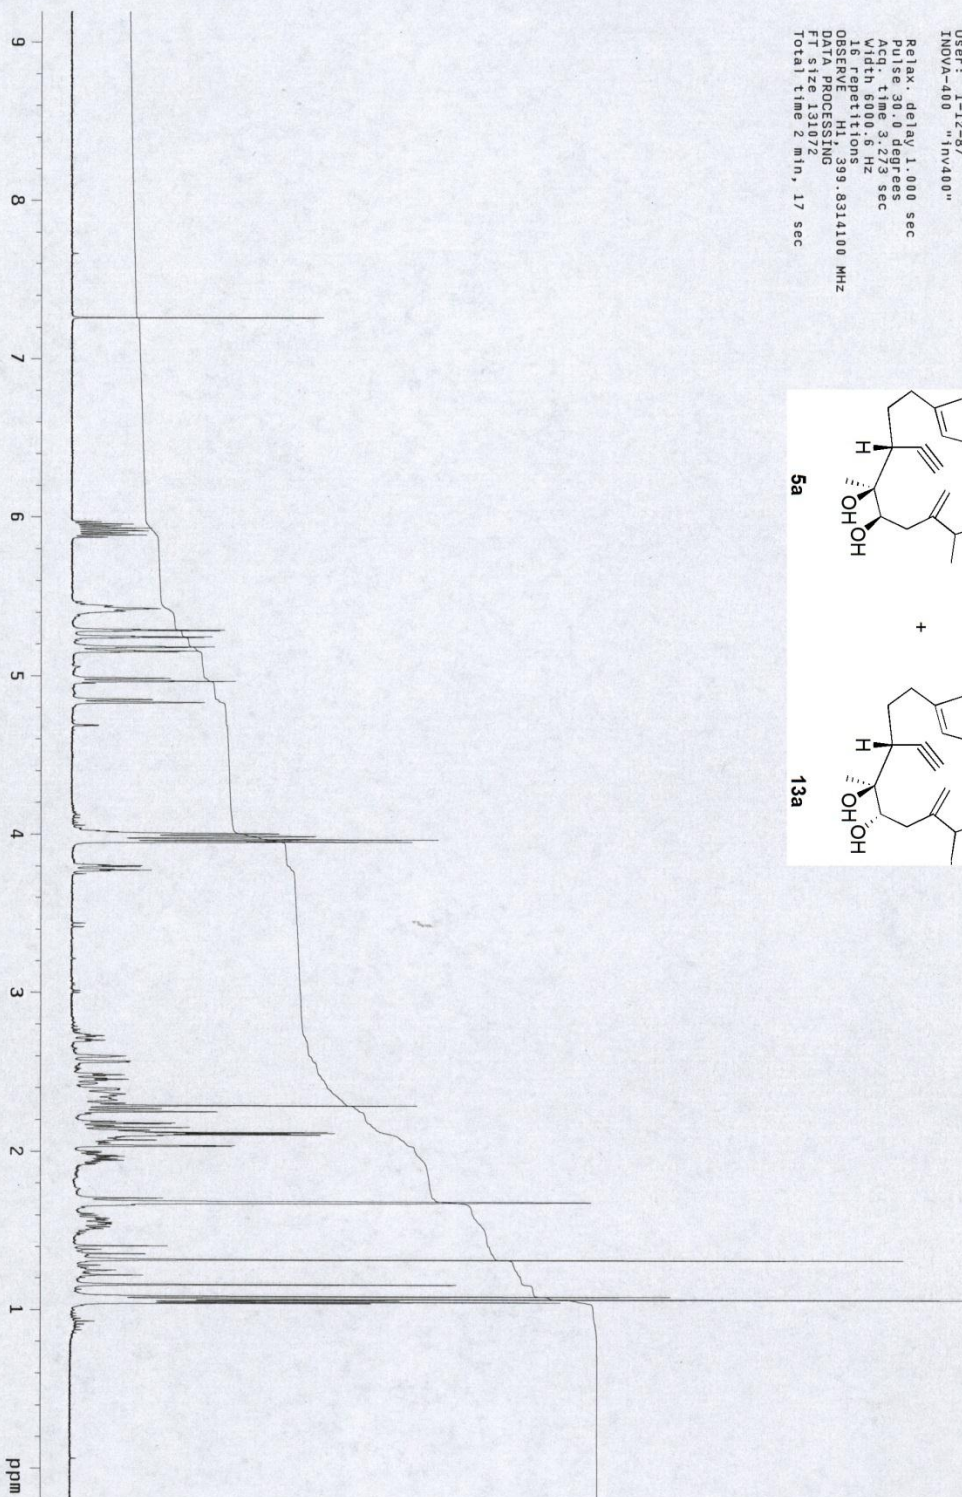

Jy-5-5-1-11  
Data Collected on:  
InV500-Innovas00  
Archive directory:  
/export/home/JungyLee/vmrsys/data  
Sample directory:  
File: Jy-5-5-1-11  
Pulse Sequence: s2pul  
Solvent: CDCl3  
Temp. 25.0 C / 298.1 K  
Relax. delay 1.000 sec  
Pulse 45.0 degrees  
Acq. time 1.892 sec  
Width 7998.4 Hz  
100 repetitions  
OBSERVE H1, 499.8948175 MHz  
DATA PROCESSING  
F1 size 32768  
Total time 4 min

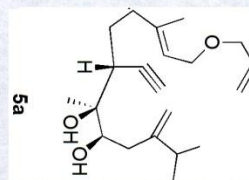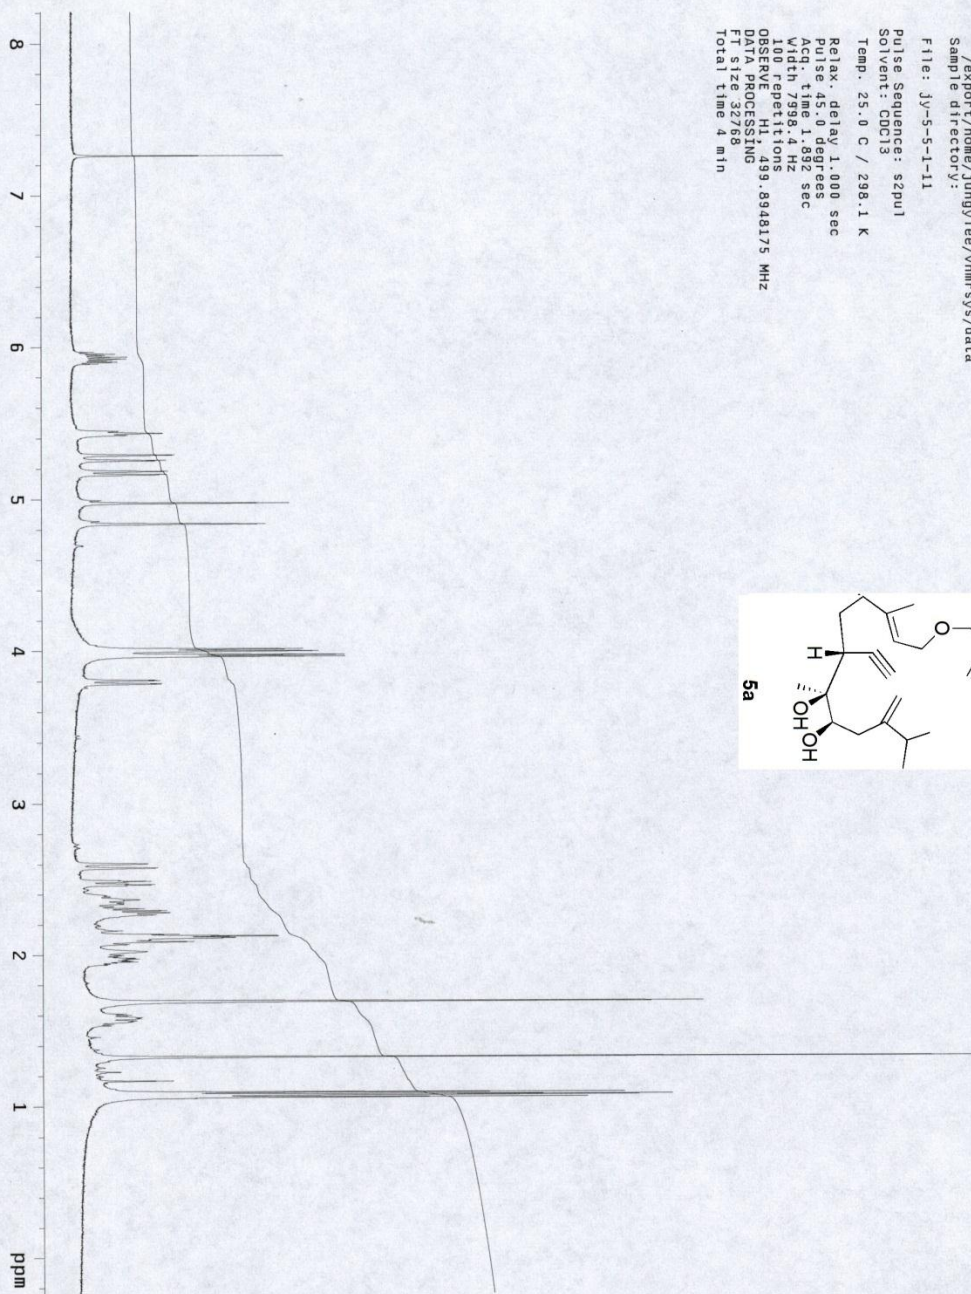



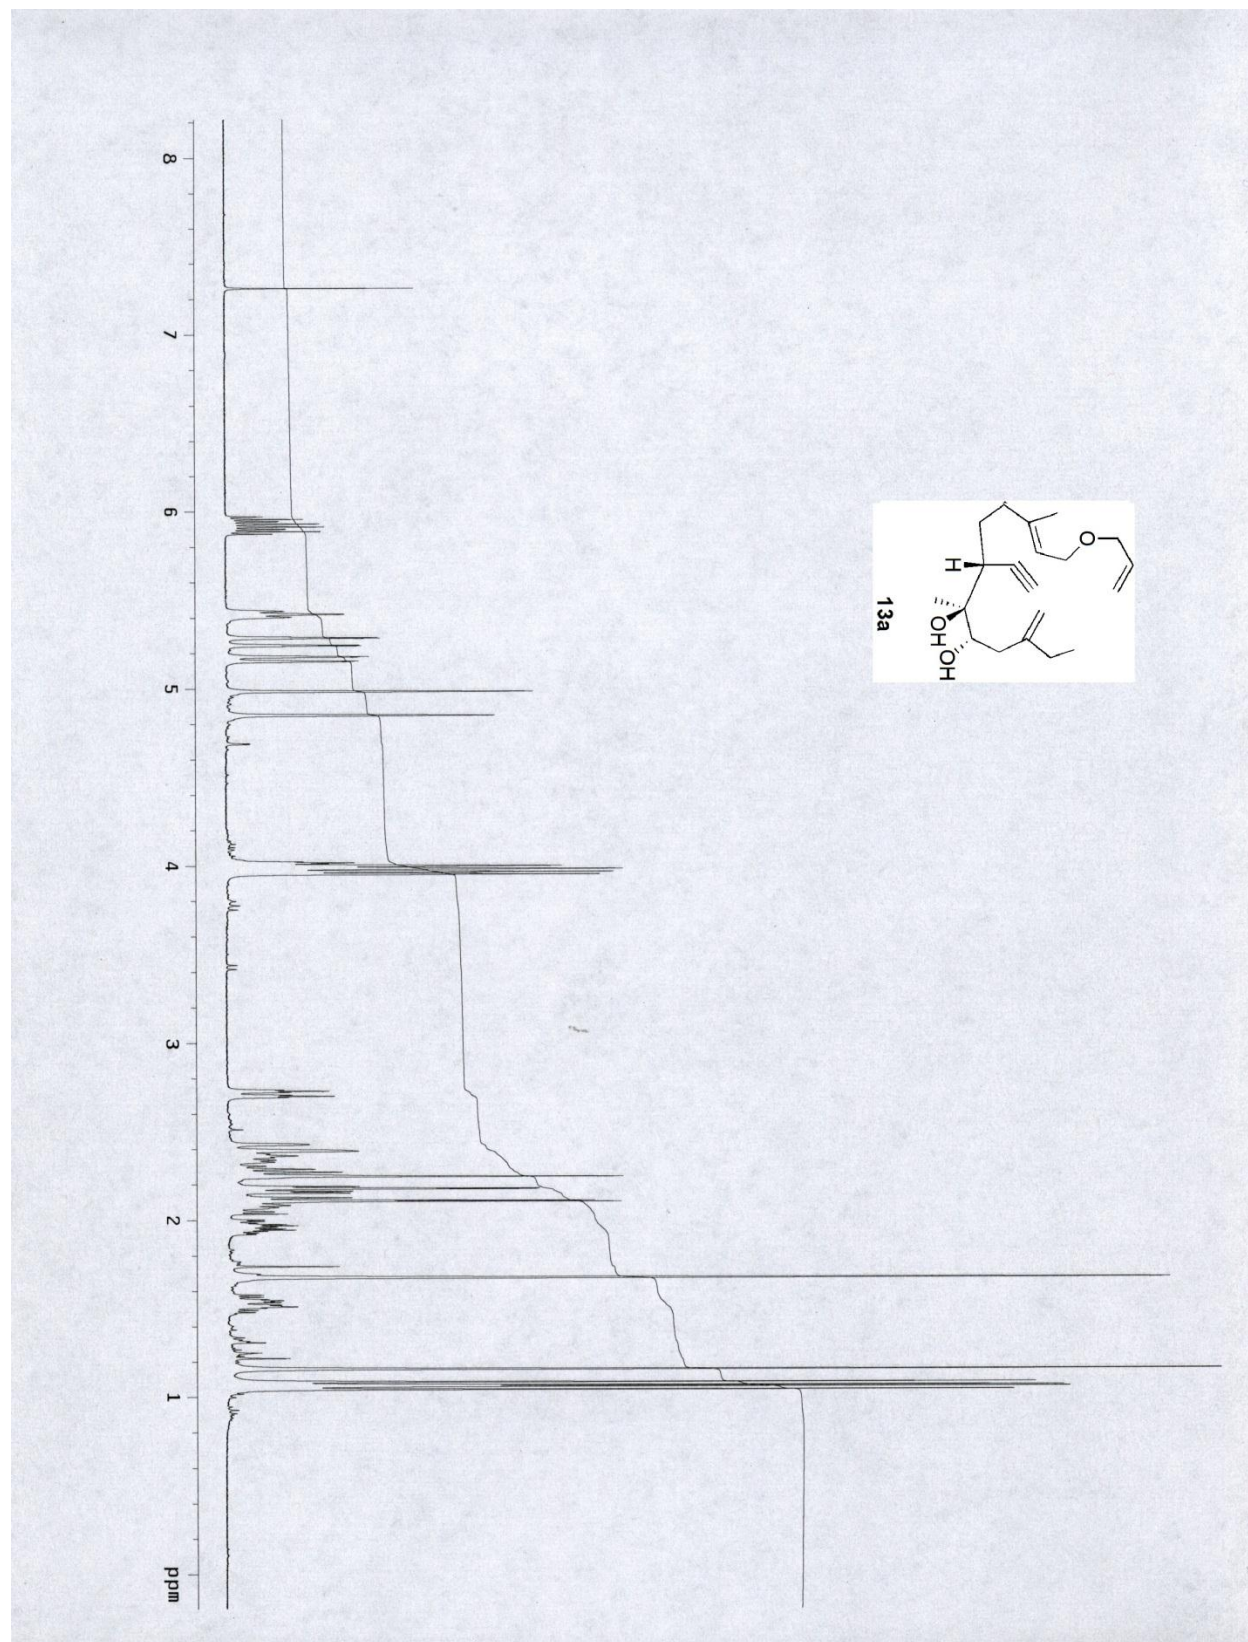

13C OBSERVE

Pulse Sequence: scpu1  
Solvent: CDCl3  
Temp: 25.0 C / 298.1 K  
INOVA-400 "Inv400"

Relax: delay 1.000 sec  
Pulse: 82.1 degrees  
Acq: time 1.199 sec  
Width 25000.0 Hz  
1688 repetitions  
OBSERVE C13, 100.5376902 MHz  
DECUPLE H1, 399.8364198 MHz  
Power 48 dB  
Pulse program on  
WALTZ-16 modulated  
DATA PROCESSING  
FT size 65536  
Total time 12 hr, 16 min, 4 sec

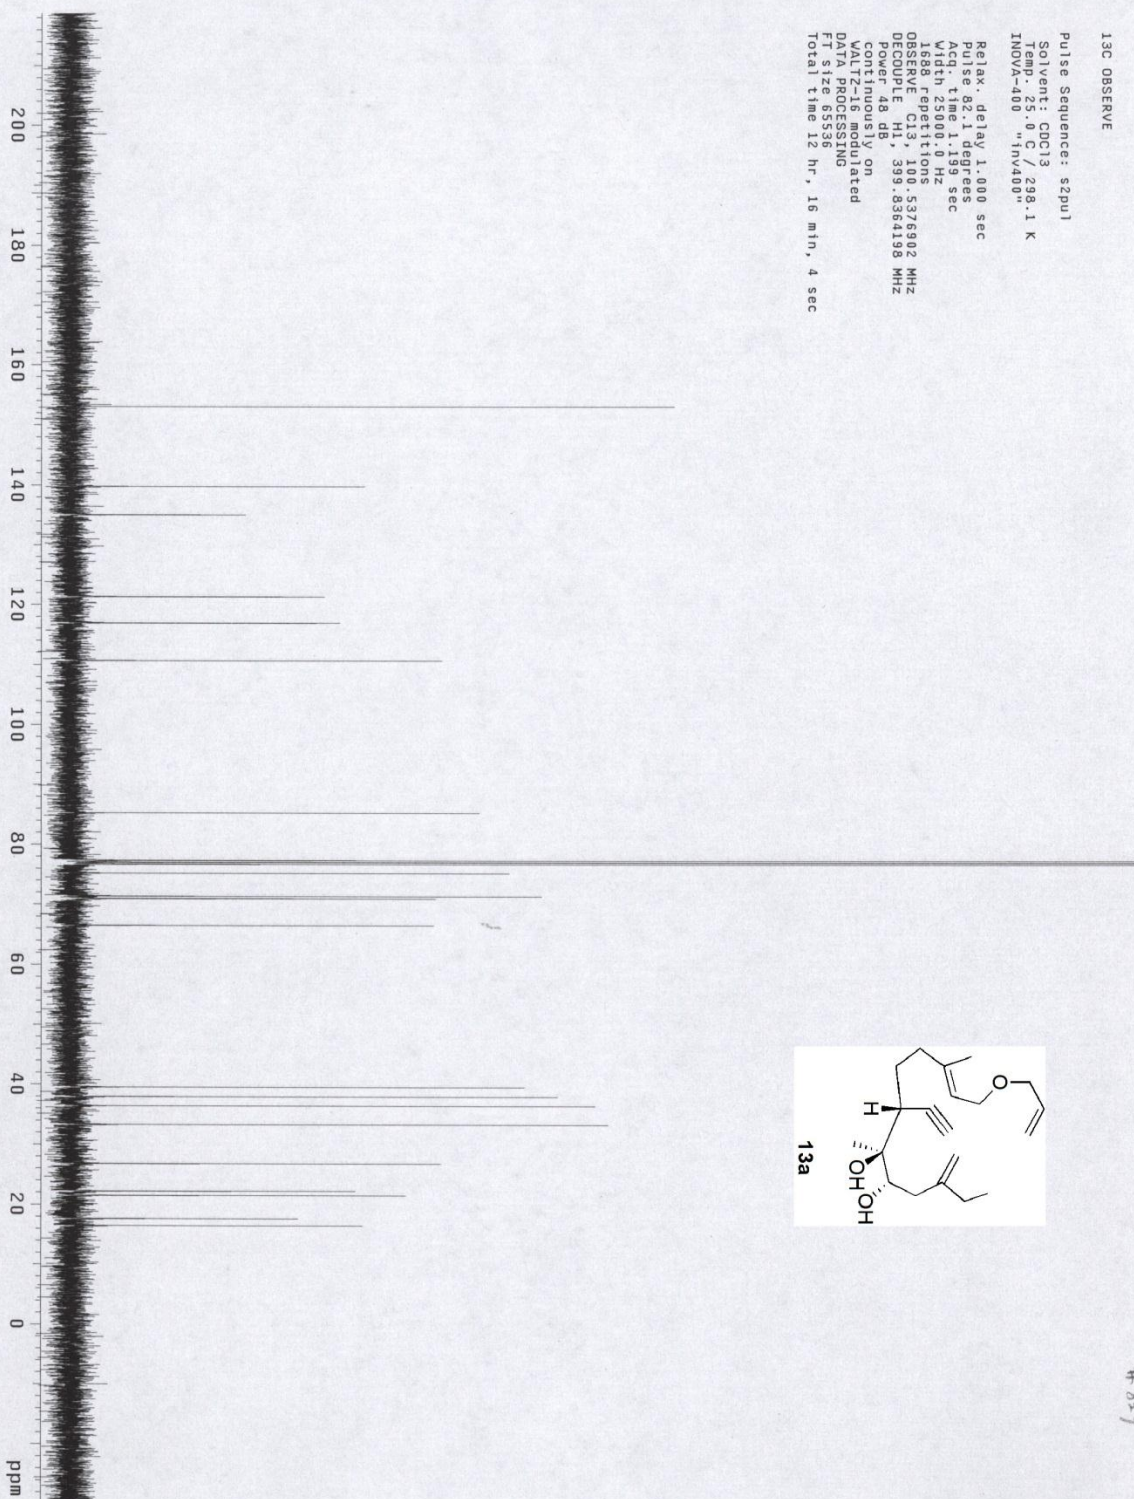

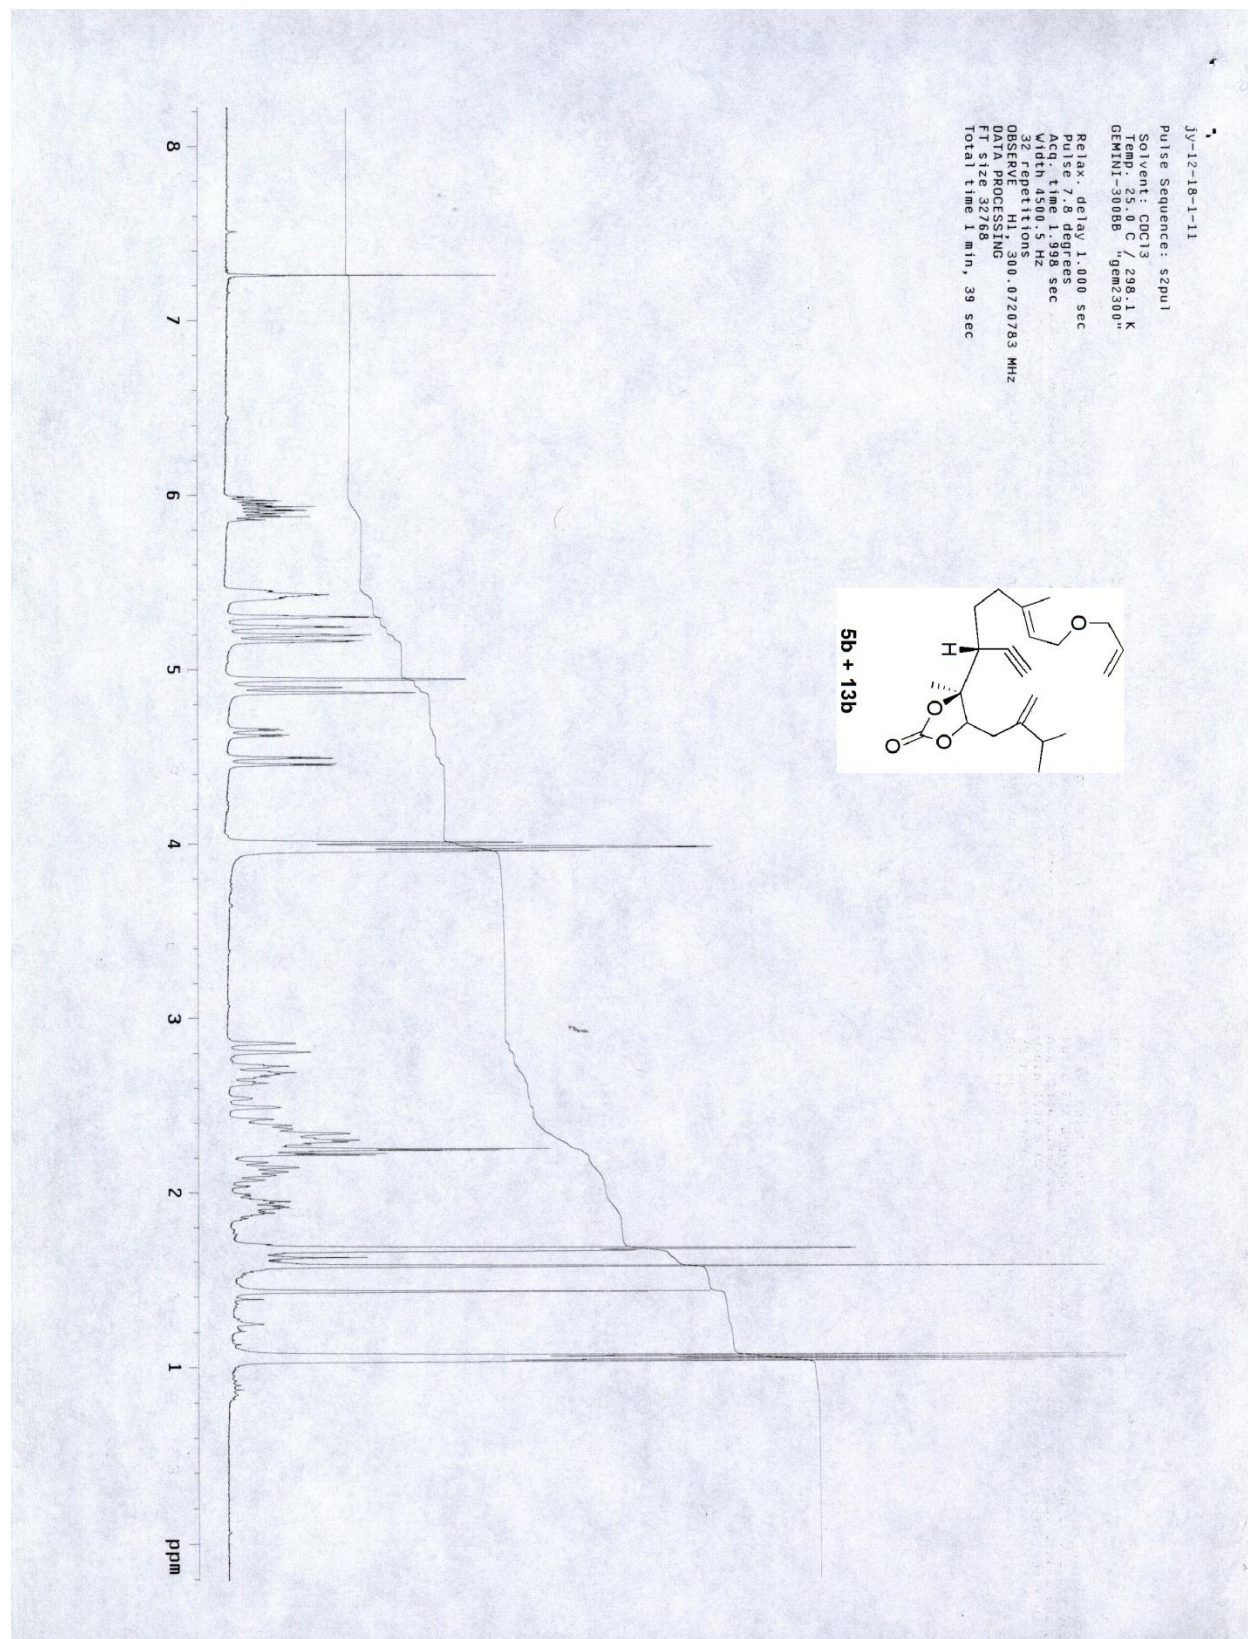

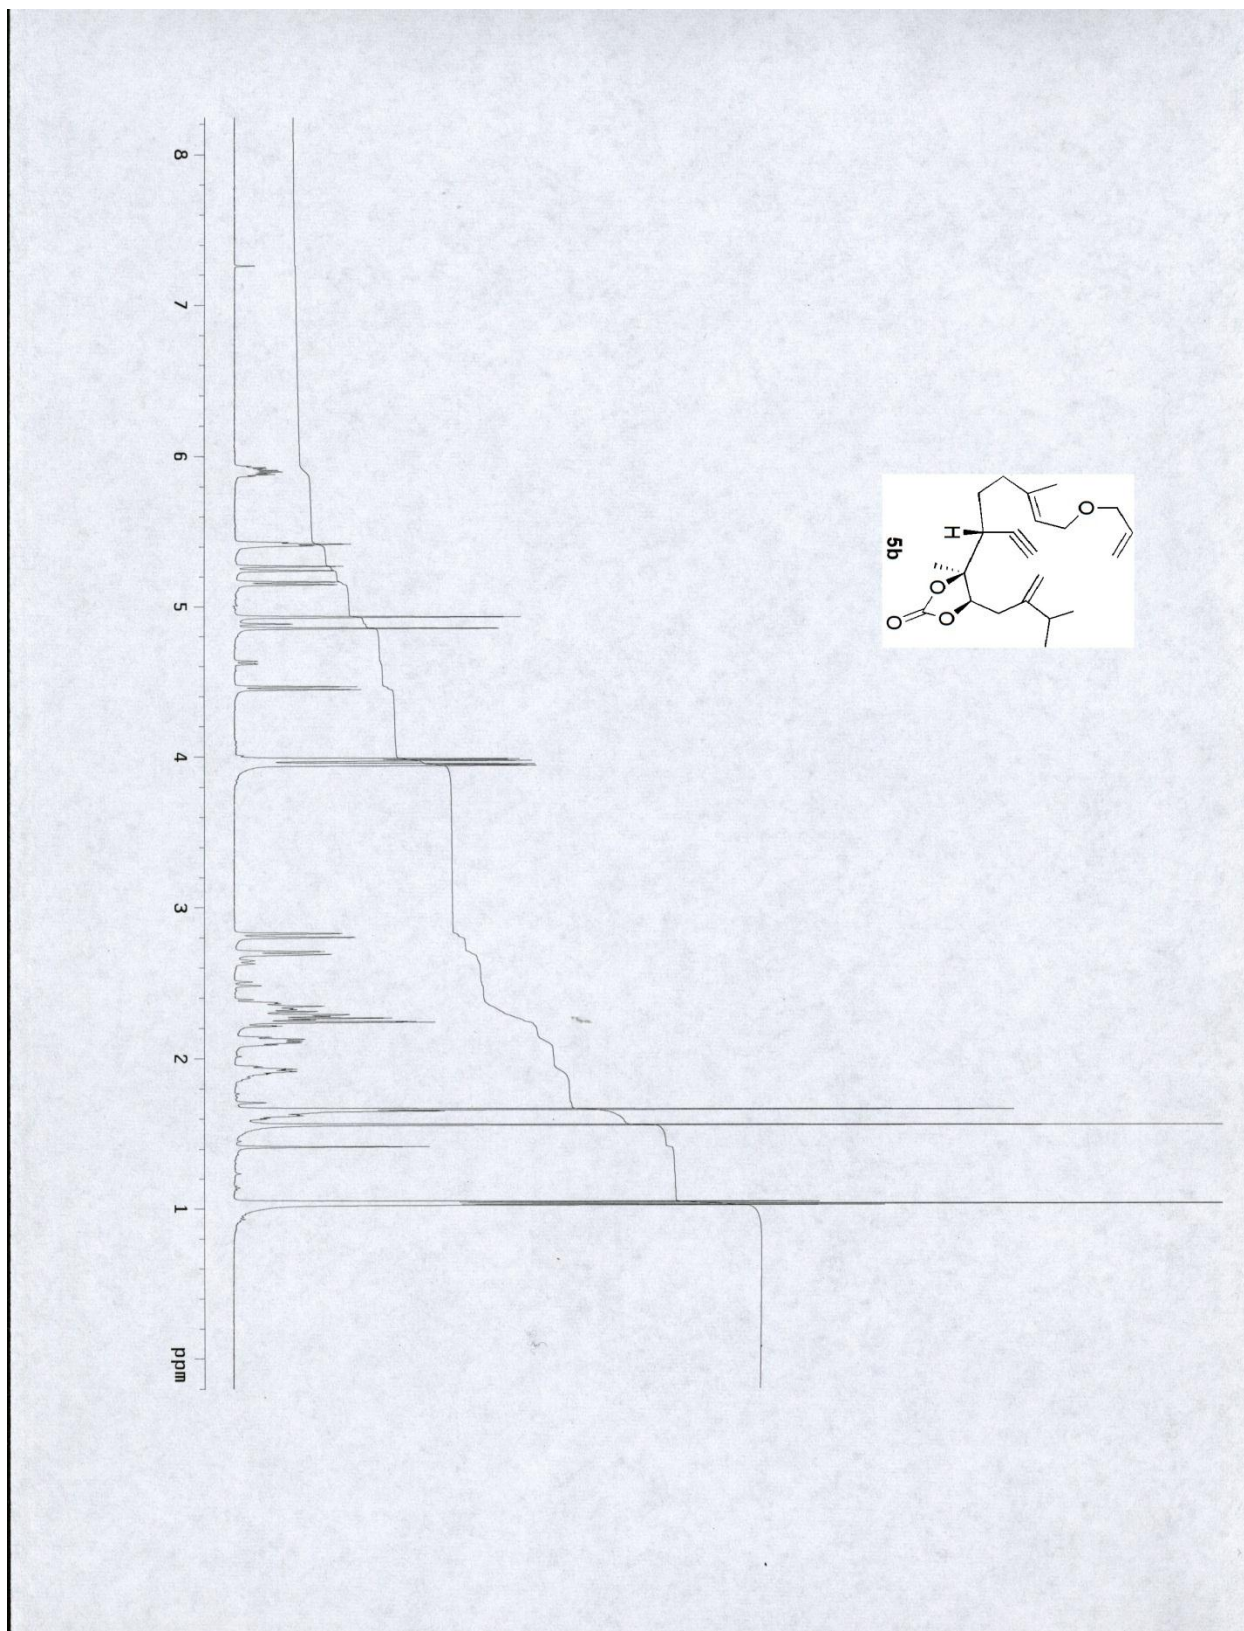

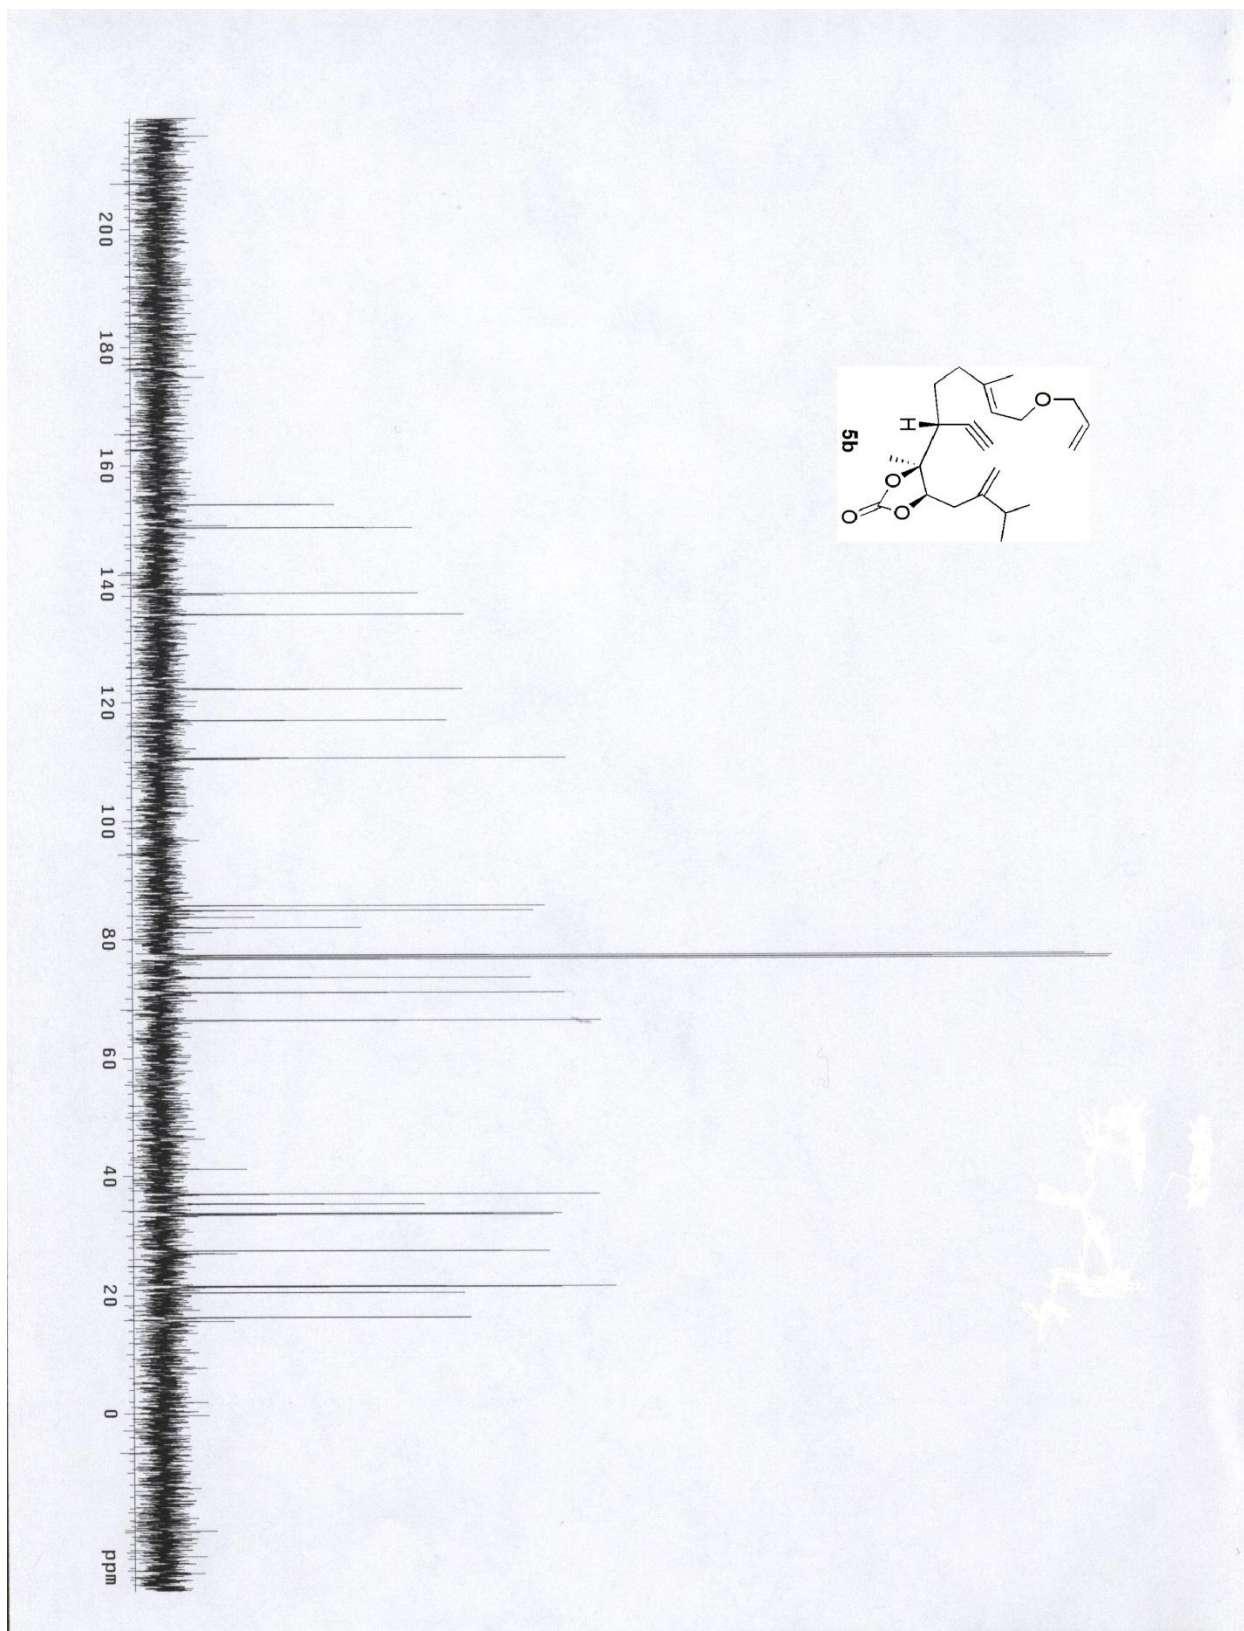



Jy-12-22-1-11  
Pulse Sequence: s2pu1  
Solvent: CDCl3  
Temp: 0 C / 298.1 K  
User: J-12-87  
INOVA-400 "inv400"  
Relax. delay 1.000 sec  
Pulse 30.0 degrees  
Acq. time 3.273 sec  
Width 6000.6 Hz  
24 repetitions  
OBSERVE: H1, 399.8314203 MHz  
PULSEPROG: zgpg30  
FT: 61260151972  
Total time 2 min, 17 sec

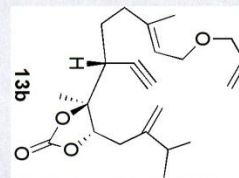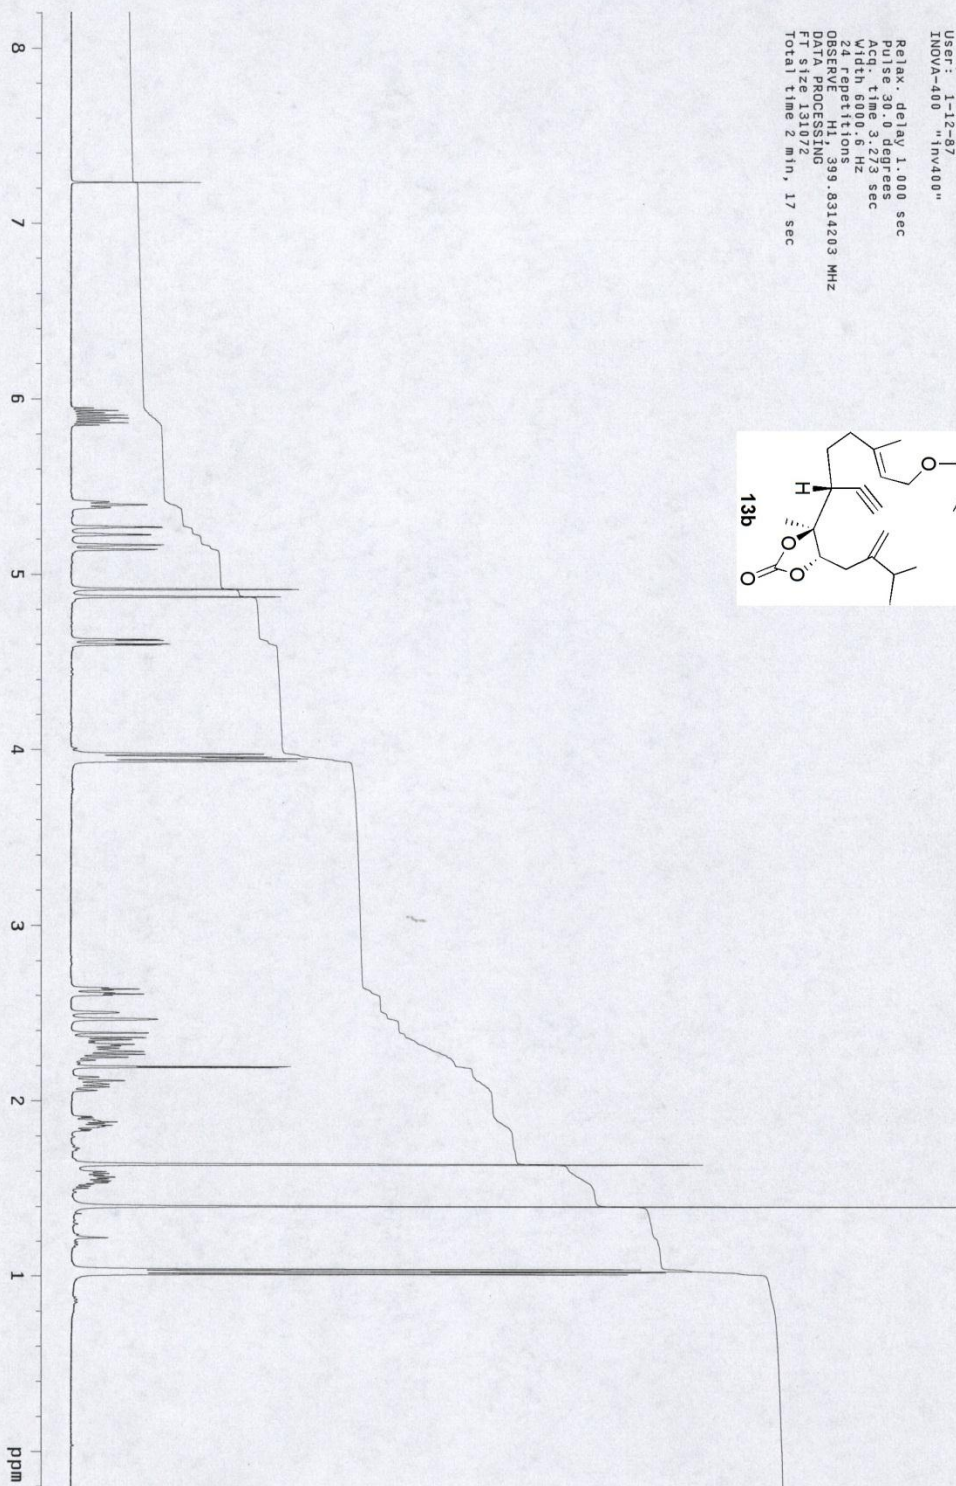

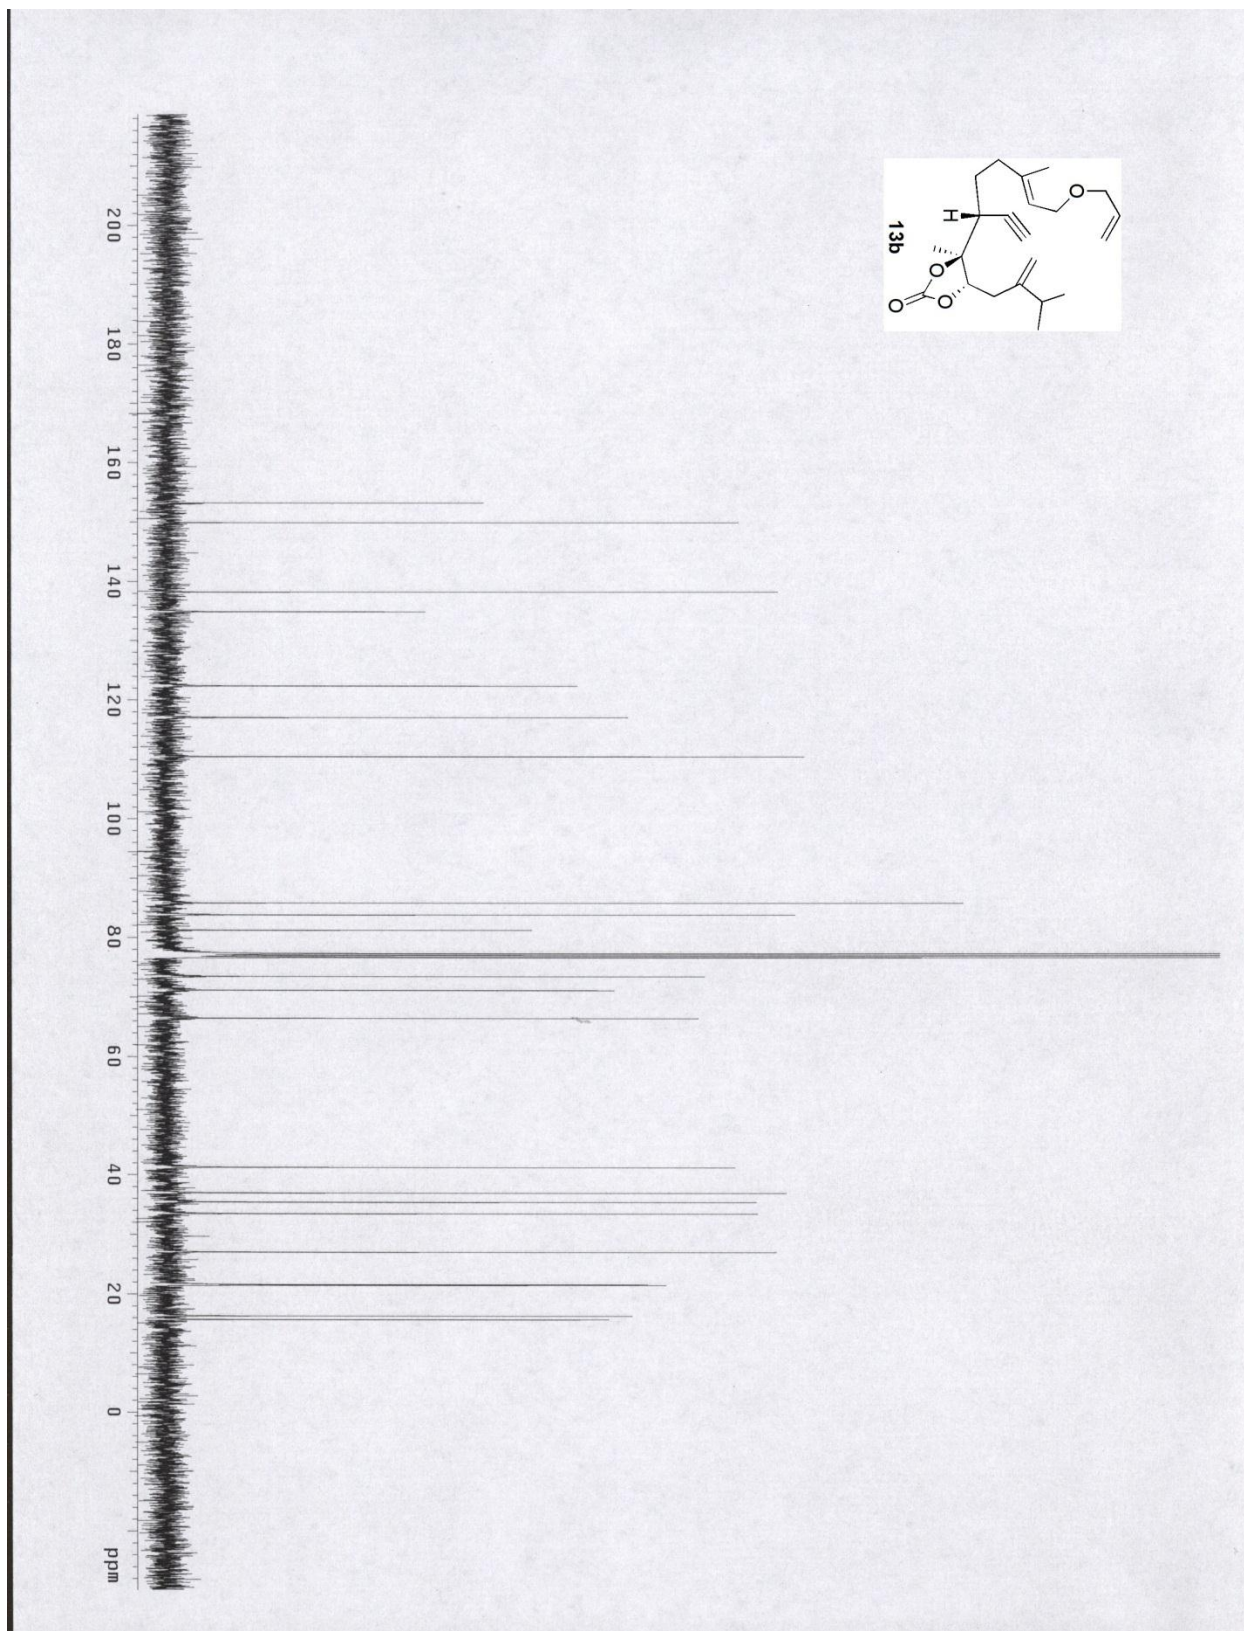

JY-10-5-1-11  
Pulse Sequence: s2pul1  
Solvent: CDCl3  
Temp: 25.0 C / 298.1 K  
UNO: -12 "inv/400"  
INOVA-400  
Pulprog: delay 1.000 sec  
Pulse: 30 deg, 0.000 sec  
Acq time: 3.293 sec  
Width: 6000.6 Hz  
40 repetitions  
OBSERVE: H1, 399.8314100 MHz  
DATA PROCESSING  
FT size 131072  
Total time 4 min, 34 sec

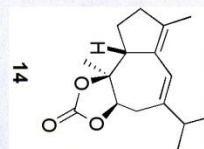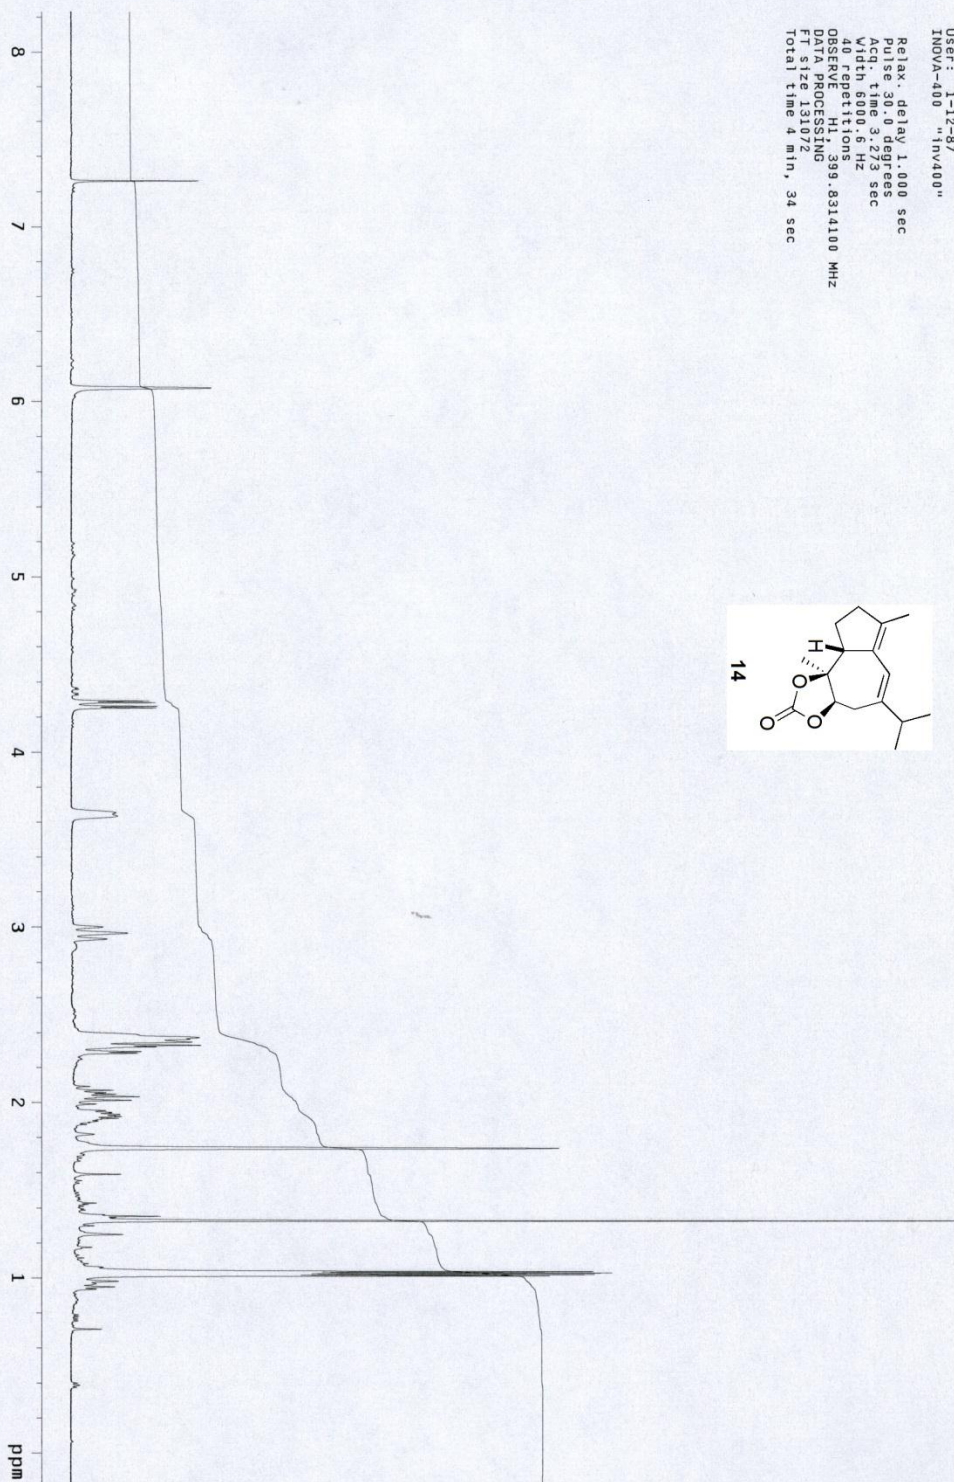

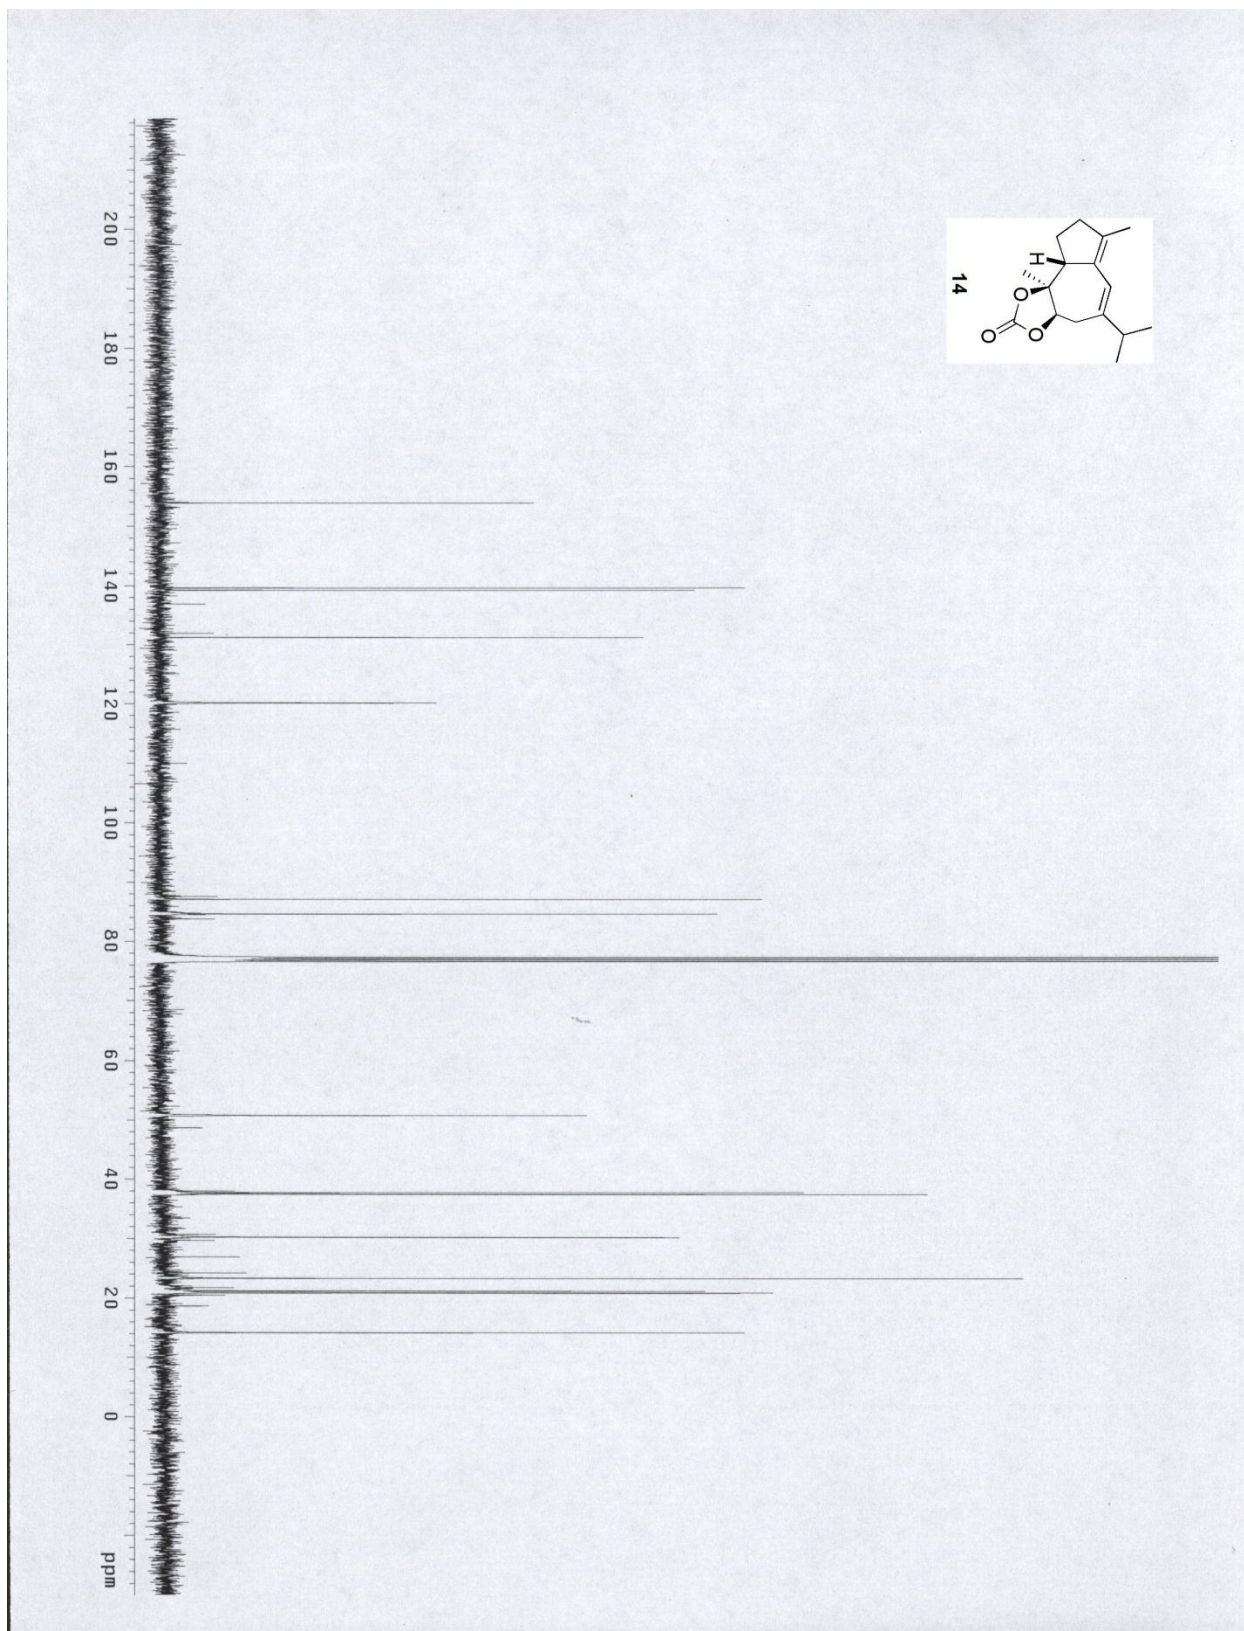

JY-10-6-1-11  
Pulse Sequence: s2pul1  
Solvent: CDCl3  
Temp: 25.0 C / 298.1 K  
User: 4-12-97  
INOVA-400 "INV400"  
Relax. delay 1.000 sec  
Acq. time 3.995 sec  
Width 6000.6 Hz  
32 repetitions  
OBSERVE H1, 399.8314096 MHz  
DATA PROCESSING  
FT size 131072  
Total time 2 min, 17 sec

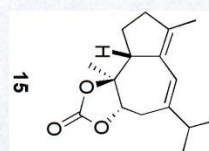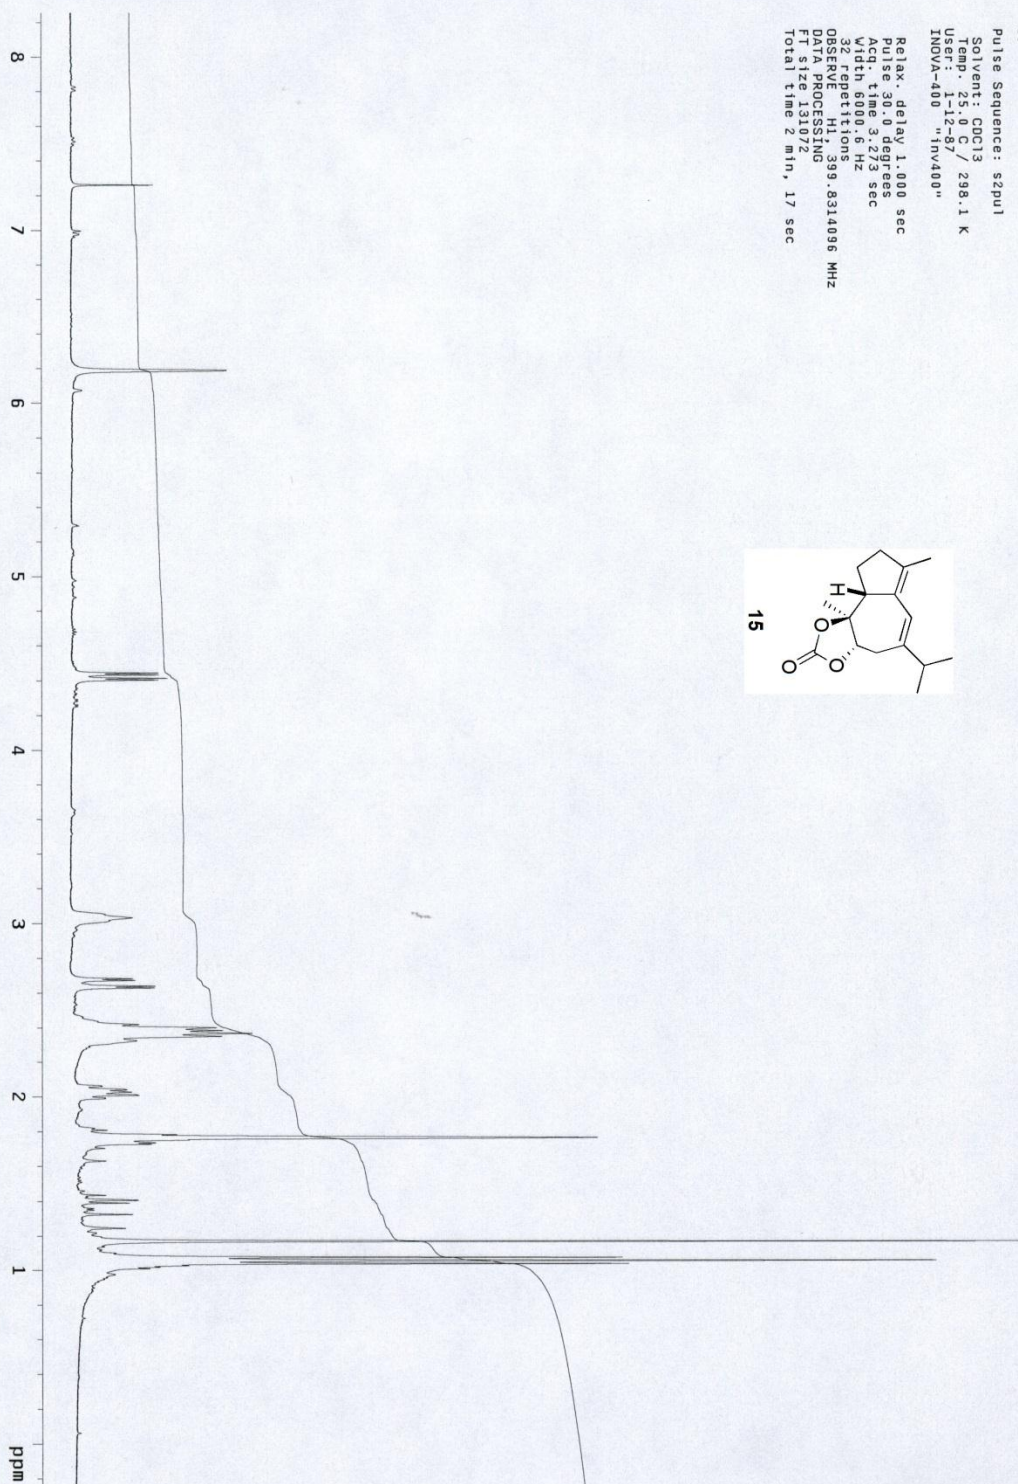

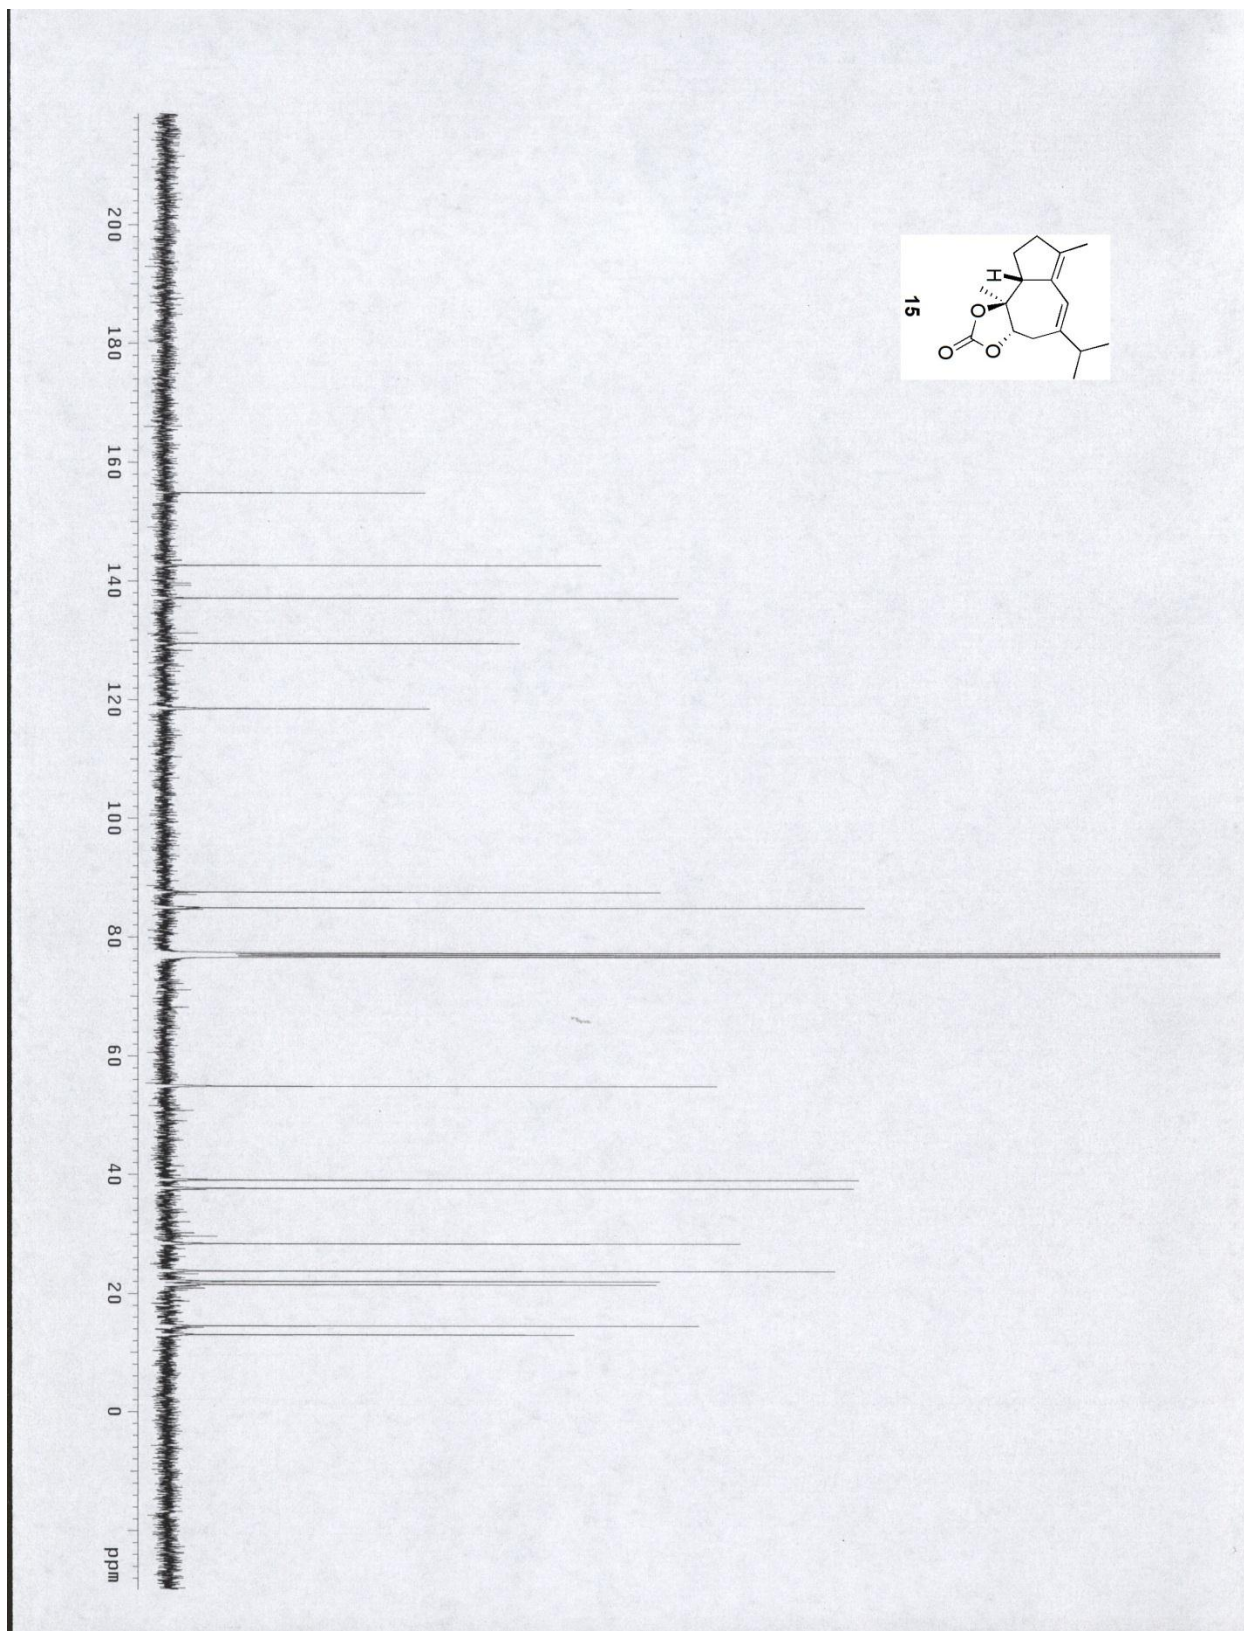

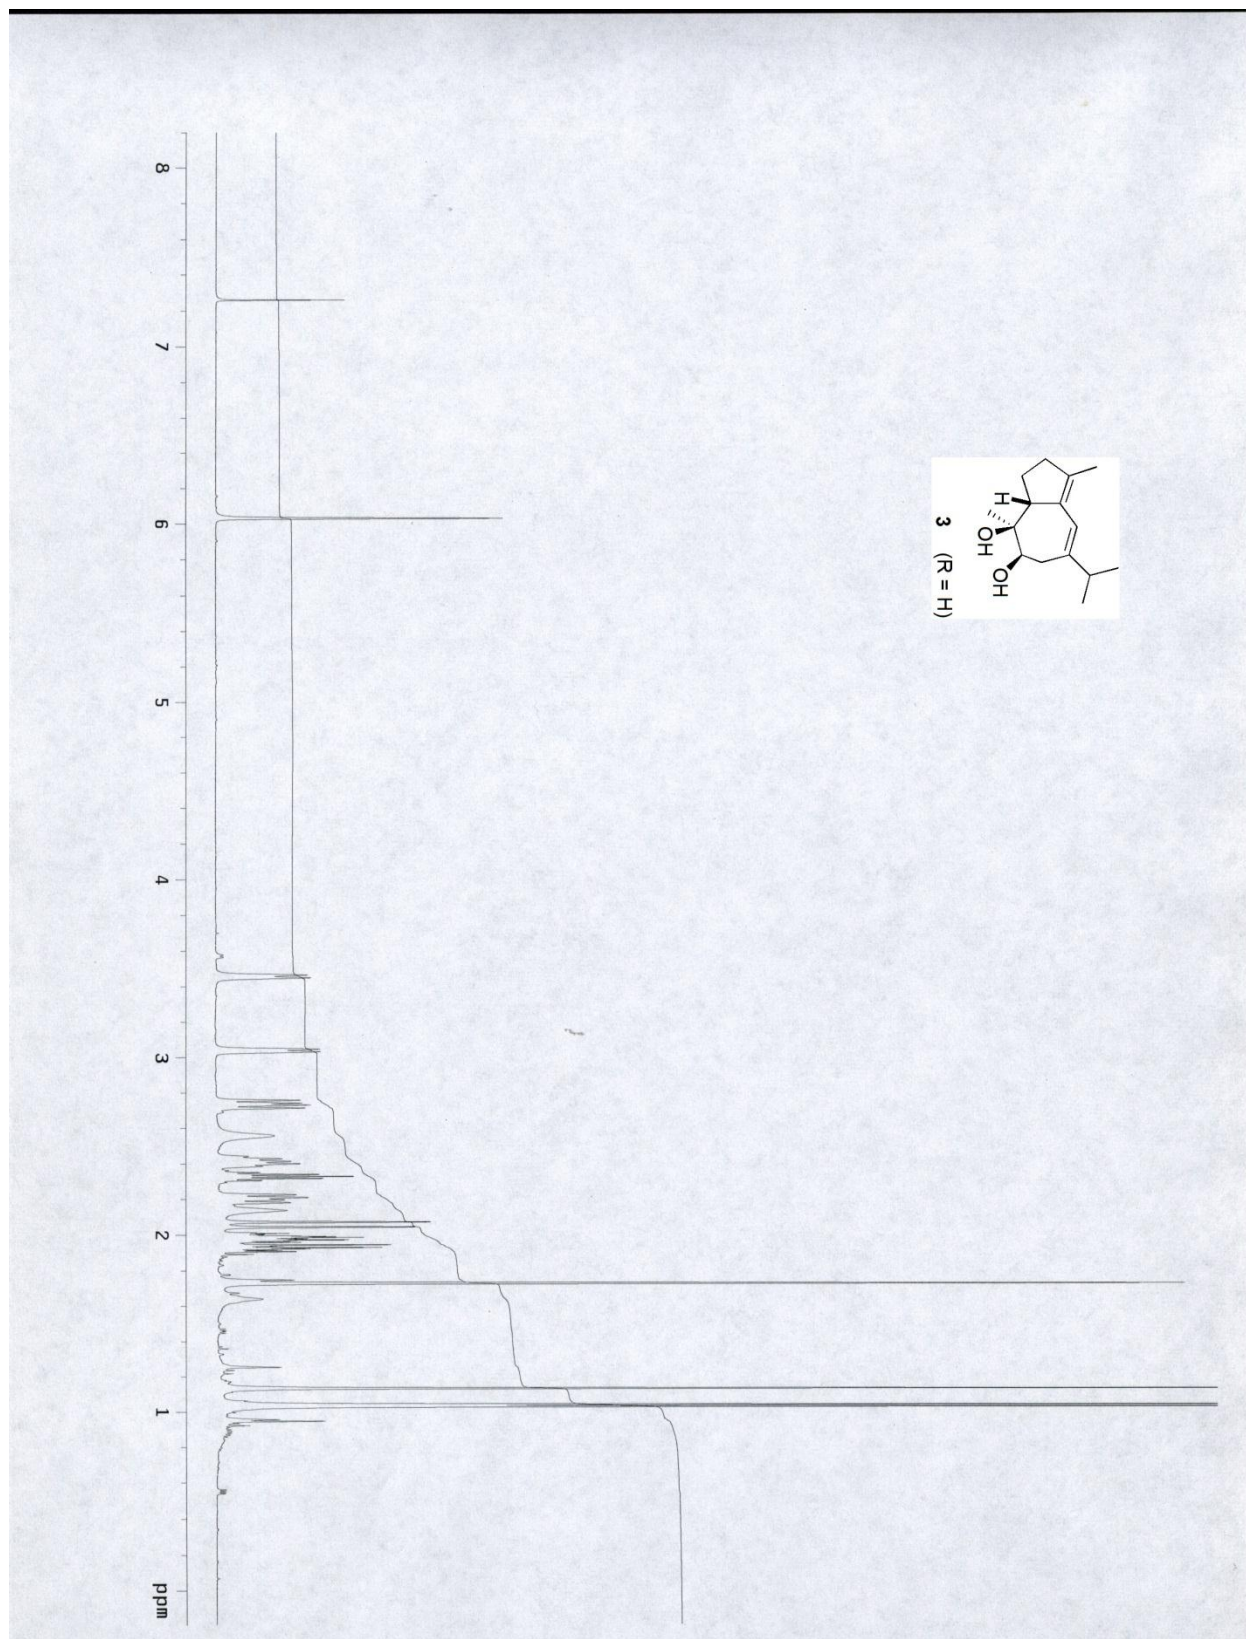

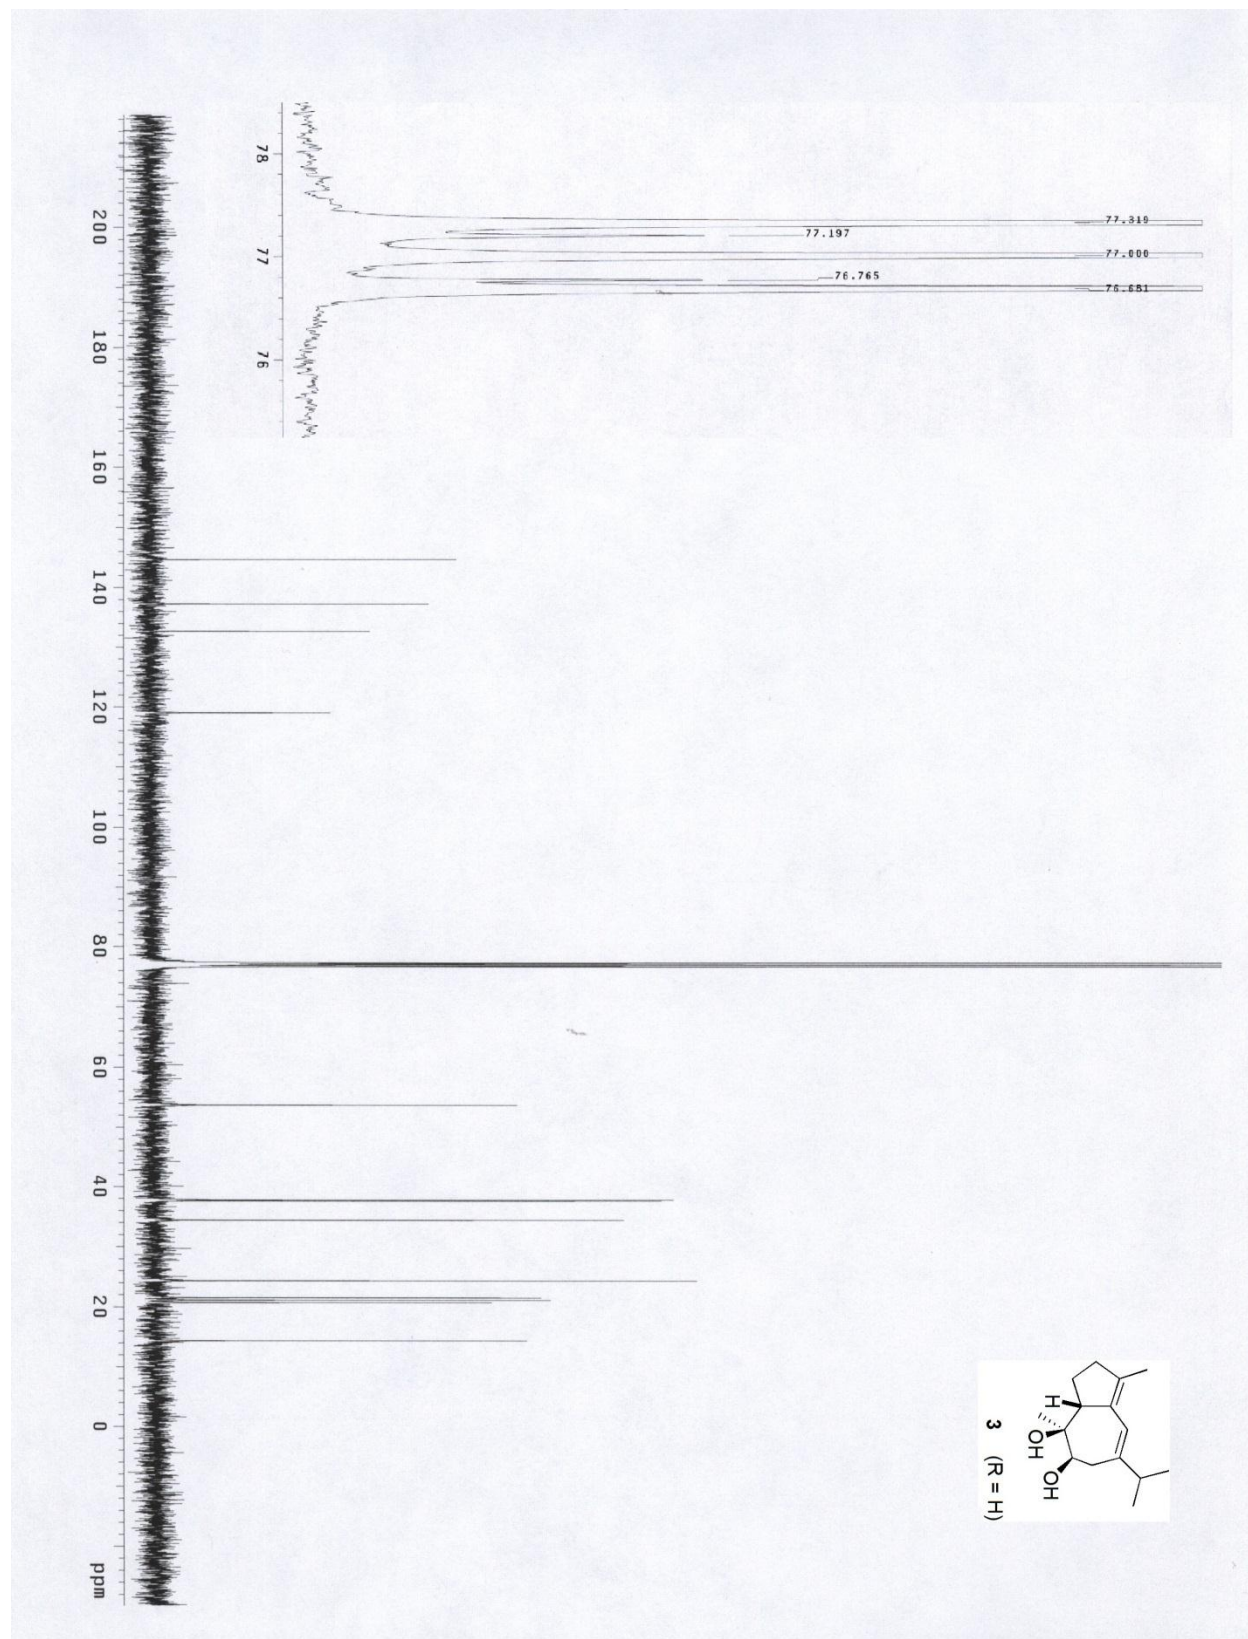



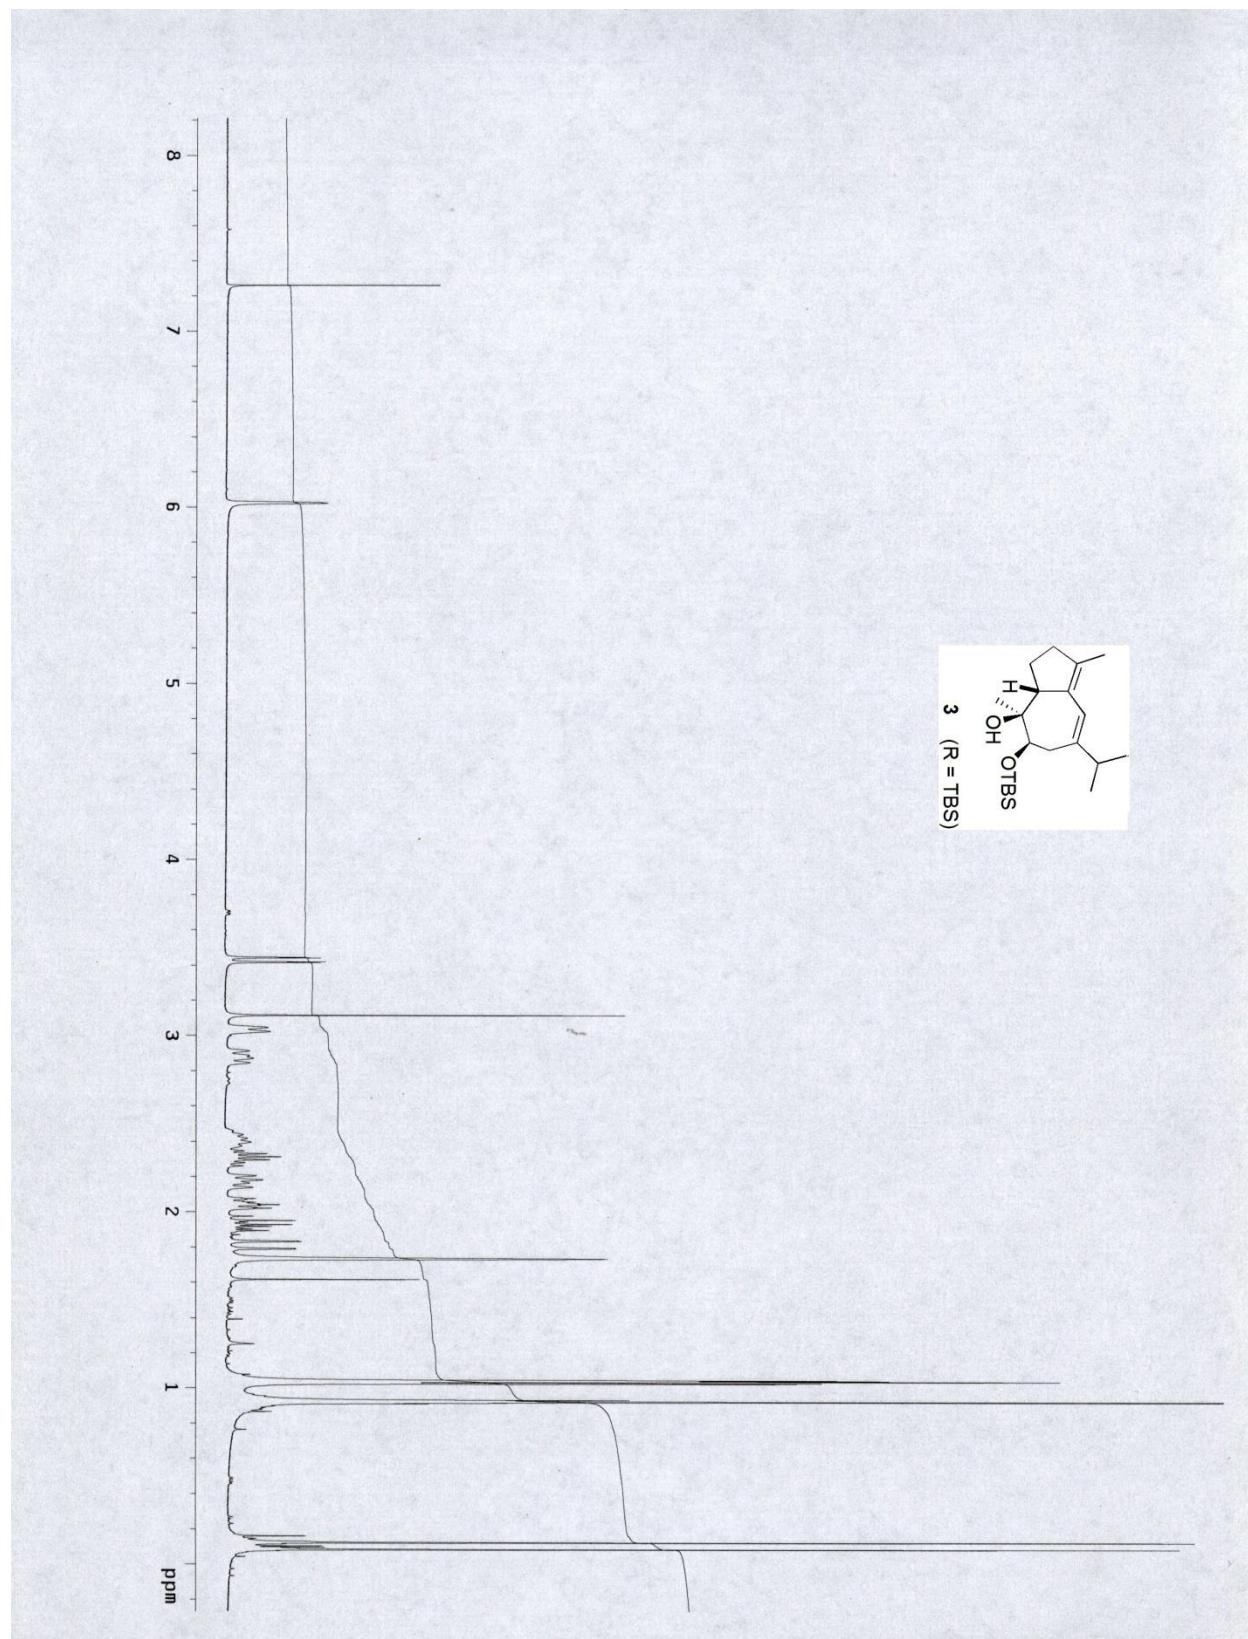

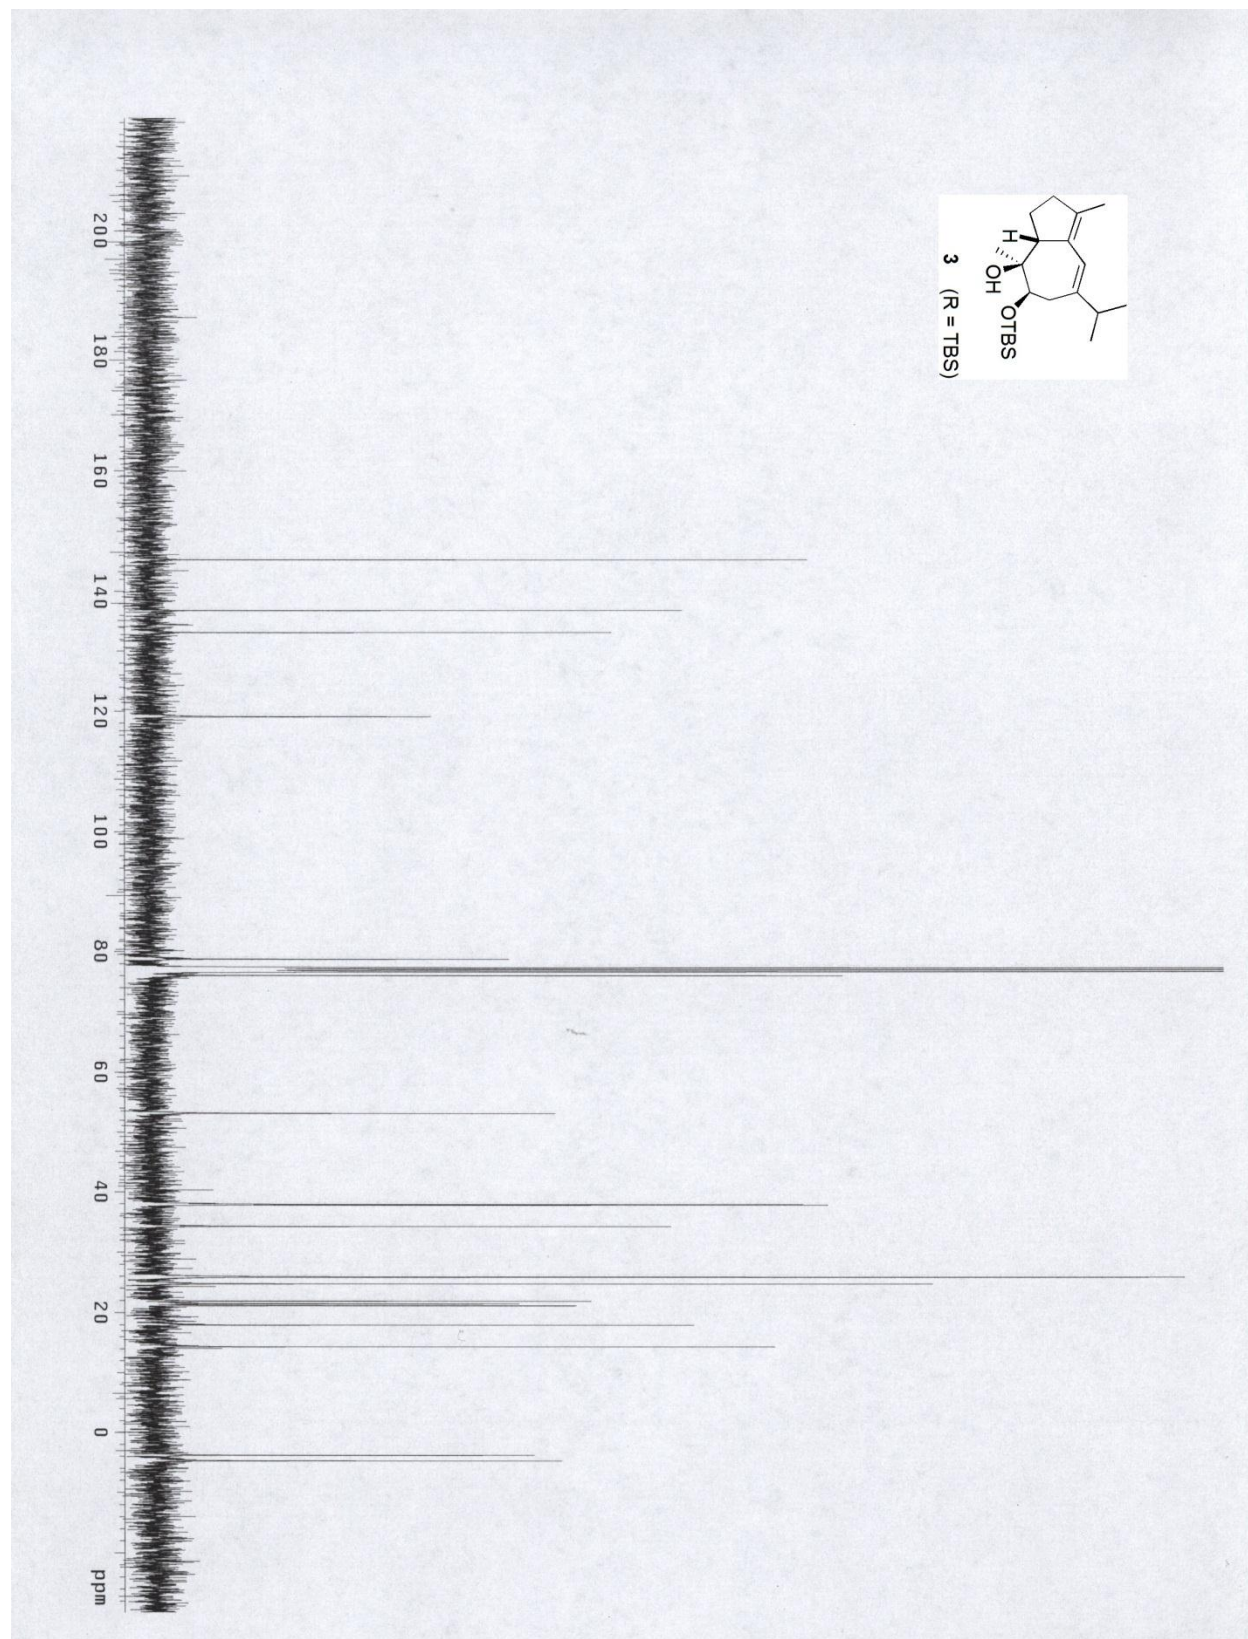

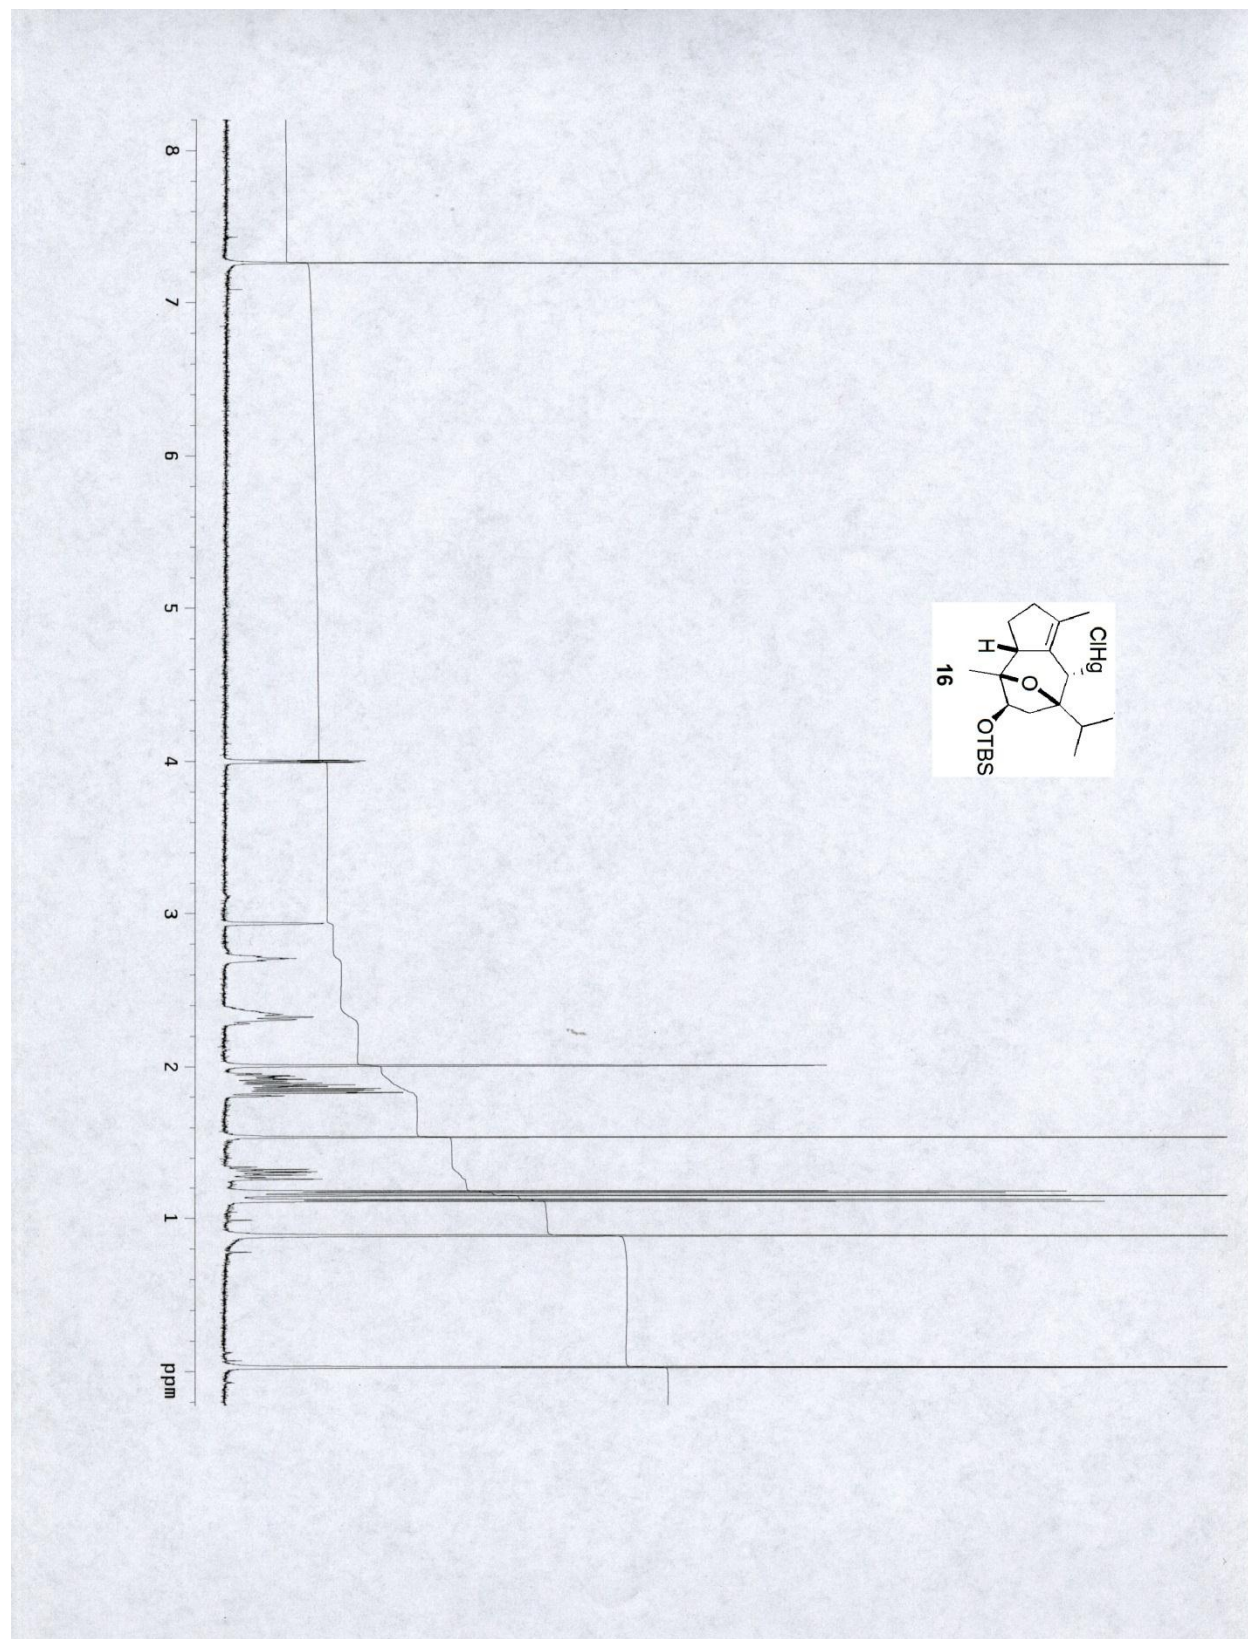

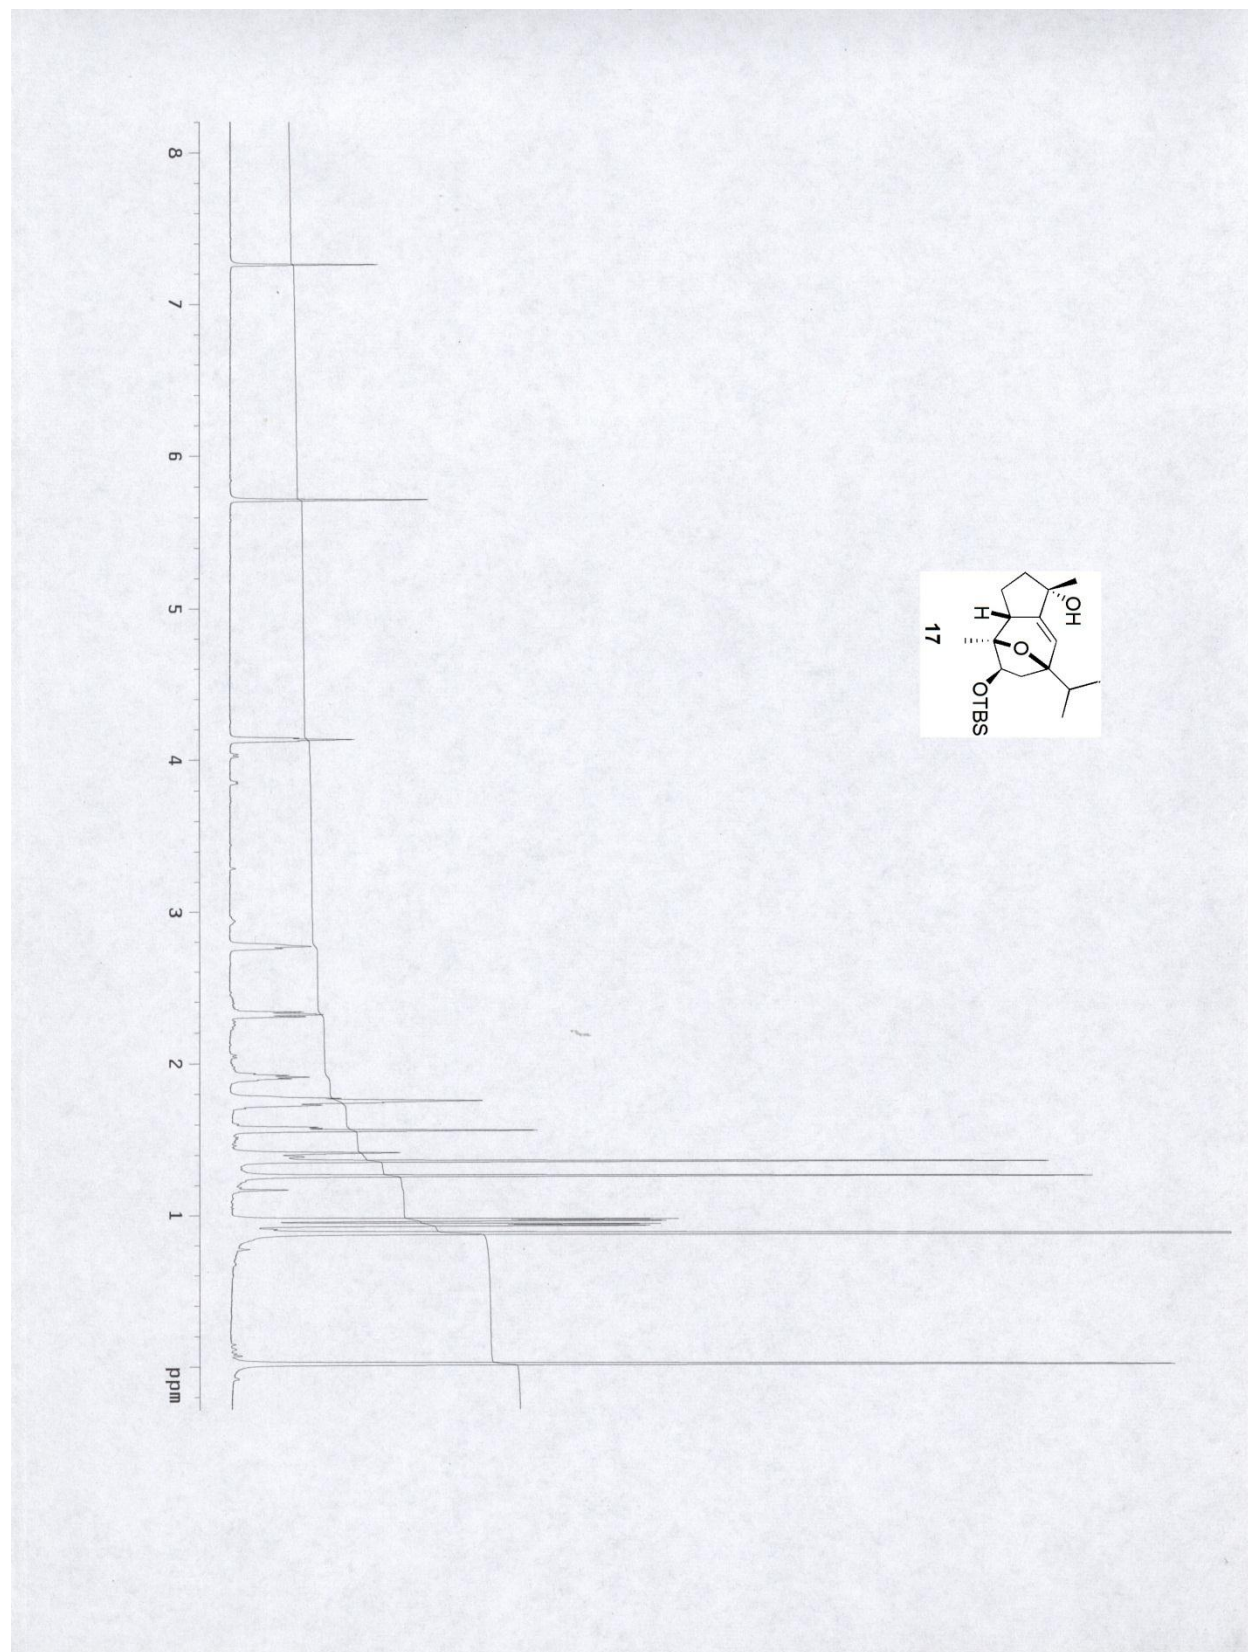

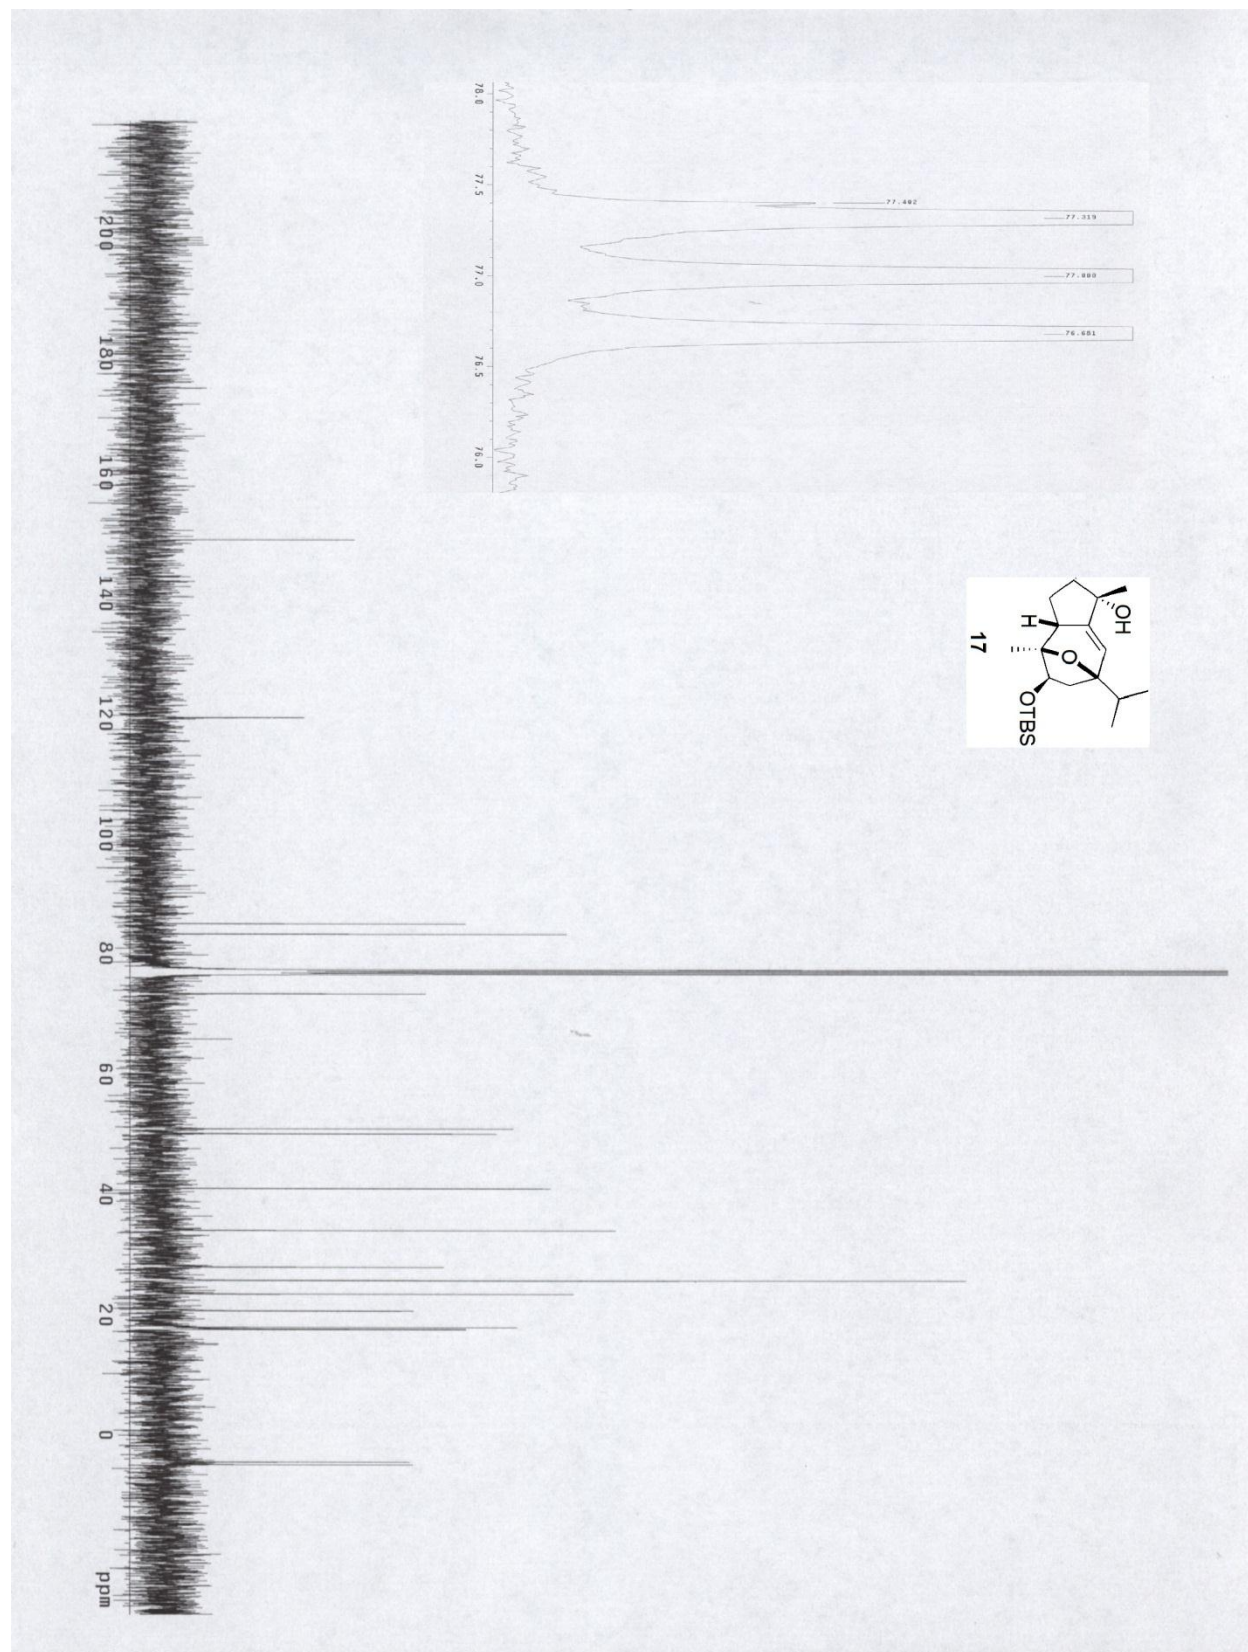

Jy-11-19-1-11  
Pulse Sequence: s2pul  
Solvent: CDCl3  
Temp: 25.0 C / 298.1 K  
User: 1-12-87  
File: Jy-11-19-1-11  
INOVA-400 "1nv400"  
Relax. delay 1.000 sec  
Pulse 30.0 degrees  
Acq. time 3.273 sec  
Width 6000.6 Hz  
Repetitions 399.8314095 MHz  
OSER: 1  
DATA PROCESSING  
FT size 131972  
Total time 4 min, 34 sec

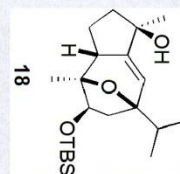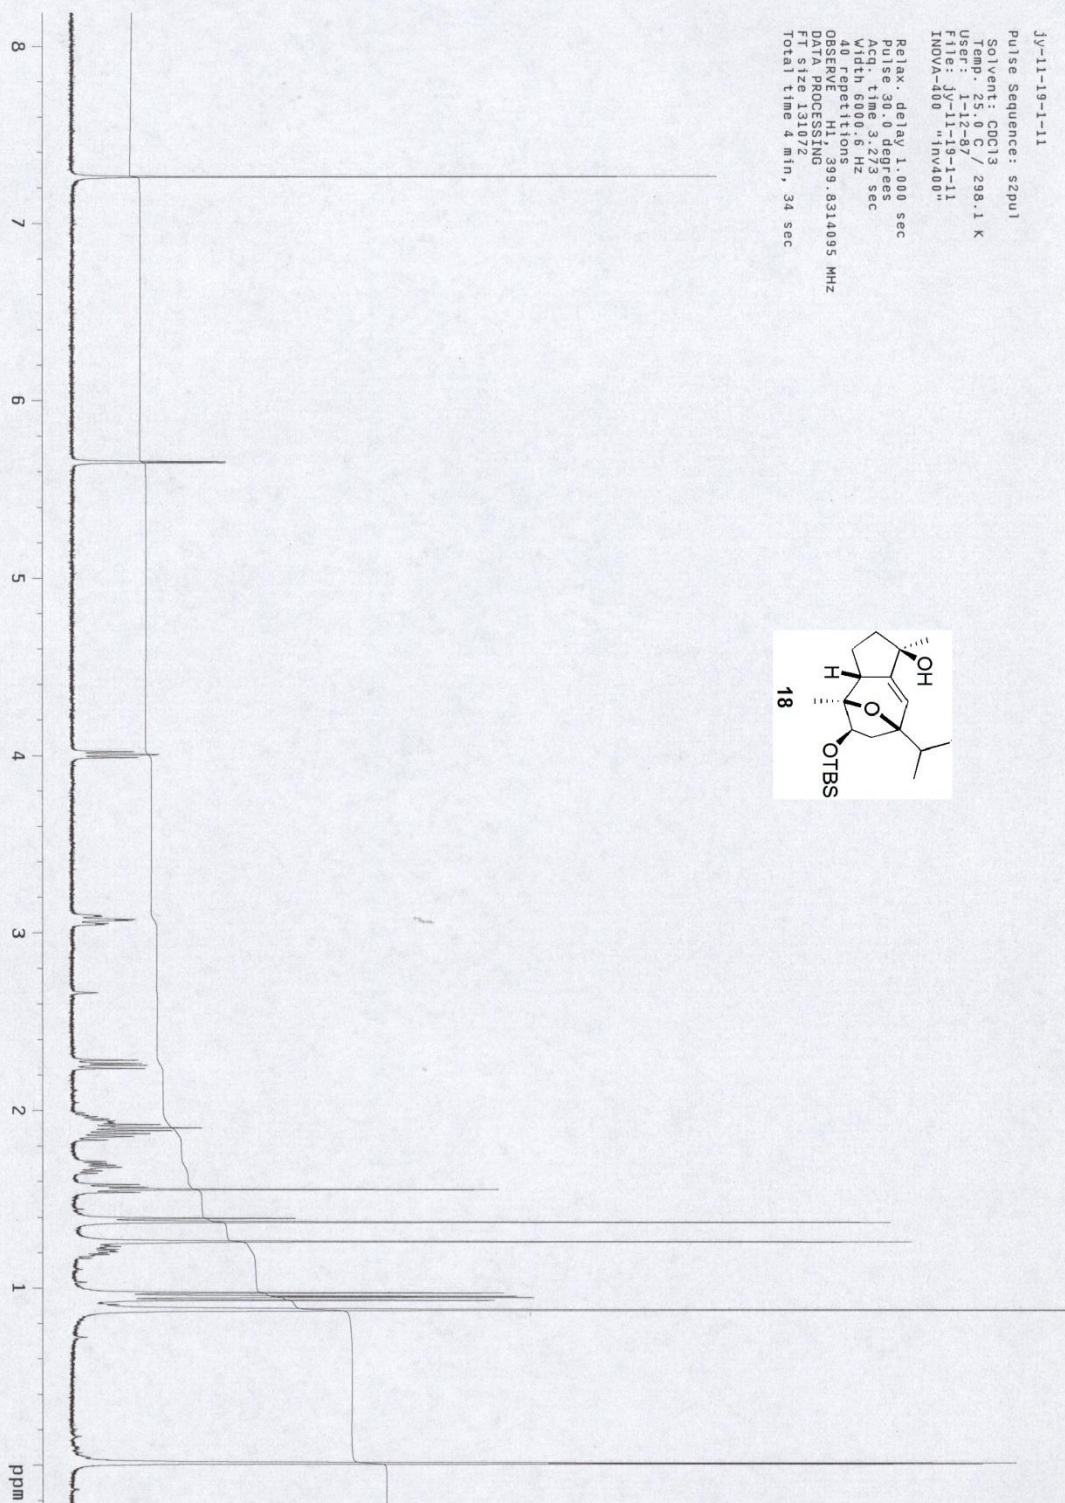

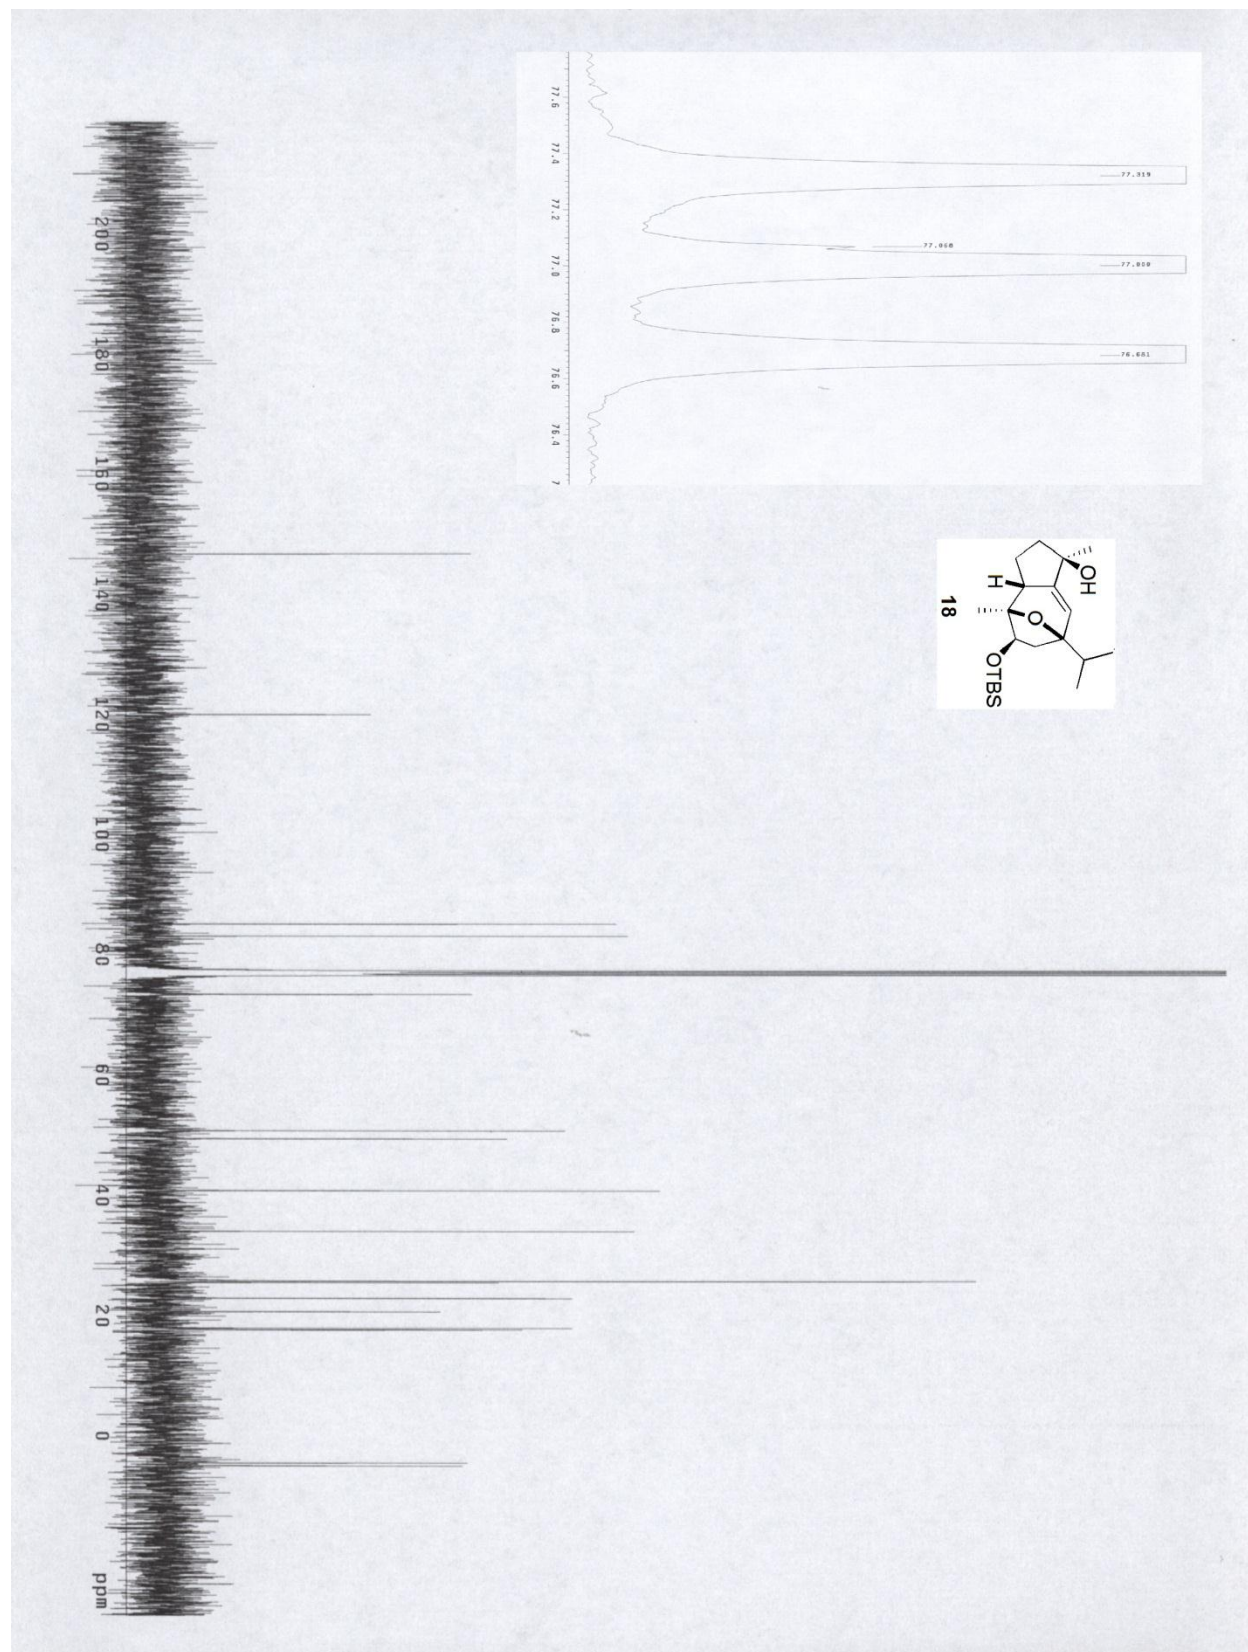

Supplement: NIHMS375937-supplement-1_si_001.pdf [file NIHMS375937-supplement-1_si_001.pdf]
